# Supplementary material for: Comparison of influencing factors on outcomes of single and multiple road traffic injuries: A regional study in Shanghai, China (2011-2014)
Source: PubMed Central journal article supplement (PMC5426634; doi:10.1371/journal.pone.0176907), 2017-05-11
Supplement: pone.0176907.s002.pdf [file pone.0176907.s002.pdf]

| <b>ID</b> | <b>Gender</b> | <b>Age</b> | <b>Marital status</b> | <b>Admission pathway</b> | <b>Prehospital time</b> | <b>Outcome</b> |
|-----------|---------------|------------|-----------------------|--------------------------|-------------------------|----------------|
| 1         | 1             | 4          | 3                     | 3                        | 1                       | 3              |
| 2         | 2             | 5          | 3                     | 2                        | 3                       | 3              |
| 3         | 2             | 4          | 3                     | 2                        | 3                       | 4              |
| 4         | 1             | 3          | 2                     | 3                        | 3                       | 4              |
| 5         | 1             | 2          | 2                     | 3                        | 3                       | 3              |
| 6         | 1             | 6          | 3                     | 3                        | 3                       | 4              |
| 7         | 1             | 6          | 3                     | 3                        | 2                       | 4              |
| 8         | 1             | 7          | 2                     | 3                        | 3                       | 4              |
| 9         | 1             | 4          | 3                     | 3                        | 1                       | 4              |
| 10        | 1             | 6          | 3                     | 3                        | 3                       | 4              |
| 11        | 1             | 6          | 2                     | 2                        | 3                       | 3              |
| 12        | 2             | 6          | 3                     | 3                        | 2                       | 4              |
| 13        | 2             | 5          | 3                     | 3                        | 3                       | 3              |
| 14        | 2             | 6          | 2                     | 3                        | 3                       | 3              |
| 15        | 1             | 3          | 3                     | 3                        | 2                       | 3              |
| 16        | 2             | 6          | 2                     | 3                        | 3                       | 3              |
| 17        | 1             | 4          | 3                     | 3                        | 3                       | 3              |
| 18        | 1             | 5          | 2                     | 2                        | 3                       | 3              |
| 19        | 1             | 6          | 3                     | 3                        | 3                       | 3              |
| 20        | 2             | 5          | 3                     | 2                        | 2                       | 4              |
| 21        | 2             | 2          | 2                     | 3                        | 2                       | 3              |
| 22        | 2             | 5          | 3                     | 3                        | 1                       | 4              |
| 23        | 2             | 5          | 3                     | 3                        | 2                       | 4              |
| 24        | 1             | 4          | 2                     | 3                        | 3                       | 3              |
| 25        | 1             | 7          | 3                     | 3                        | 3                       | 4              |
| 26        | 2             | 5          | 2                     | 2                        | 3                       | 4              |
| 27        | 1             | 5          | 3                     | 3                        | 1                       | 4              |
| 28        | 2             | 3          | 2                     | 3                        | 3                       | 3              |
| 29        | 1             | 5          | 3                     | 3                        | 2                       | 4              |
| 30        | 1             | 6          | 3                     | 3                        | 3                       | 1              |
| 31        | 1             | 4          | 3                     | 3                        | 1                       | 3              |
| 32        | 2             | 5          | 3                     | 1                        | 3                       | 3              |
| 33        | 2             | 4          | 3                     | 3                        | 1                       | 4              |
| 34        | 1             | 6          | 3                     | 3                        | 2                       | 4              |
| 35        | 2             | 4          | 3                     | 3                        | 2                       | 4              |
| 36        | 1             | 5          | 3                     | 3                        | 3                       | 4              |
| 37        | 1             | 6          | 2                     | 3                        | 3                       | 4              |
| 38        | 1             | 3          | 2                     | 3                        | 2                       | 1              |
| 39        | 1             | 6          | 3                     | 3                        | 1                       | 4              |
| 40        | 1             | 6          | 3                     | 3                        | 3                       | 3              |
| 41        | 1             | 7          | 3                     | 3                        | 2                       | 3              |
| 42        | 1             | 2          | 2                     | 3                        | 3                       | 3              |
| 43        | 2             | 6          | 3                     | 3                        | 2                       | 4              |
| 44        | 1             | 6          | 3                     | 2                        | 3                       | 4              |
| 45        | 1             | 7          | 3                     | 3                        | 2                       | 1              |
| 46        | 1             | 5          | 3                     | 3                        | 3                       | 3              |
| 47        | 2             | 7          | 3                     | 3                        | 2                       | 4              |

|    |   |   |   |   |   |   |
|----|---|---|---|---|---|---|
| 48 | 2 | 7 | 3 | 3 | 1 | 4 |
| 49 | 1 | 7 | 3 | 3 | 3 | 4 |
| 50 | 2 | 7 | 3 | 3 | 2 | 3 |
| 51 | 2 | 6 | 3 | 3 | 2 | 3 |
| 52 | 1 | 7 | 3 | 3 | 2 | 4 |
| 53 | 1 | 7 | 3 | 3 | 1 | 4 |
| 54 | 1 | 6 | 3 | 3 | 2 | 4 |
| 55 | 1 | 5 | 1 | 3 | 3 | 3 |
| 56 | 1 | 6 | 3 | 3 | 2 | 4 |
| 57 | 1 | 5 | 2 | 3 | 2 | 3 |
| 58 | 1 | 4 | 3 | 3 | 2 | 4 |
| 59 | 1 | 5 | 3 | 3 | 2 | 4 |
| 60 | 1 | 5 | 3 | 3 | 3 | 3 |
| 61 | 1 | 5 | 3 | 3 | 2 | 4 |
| 62 | 1 | 4 | 3 | 3 | 3 | 3 |
| 63 | 2 | 5 | 3 | 3 | 3 | 4 |
| 64 | 2 | 5 | 3 | 3 | 2 | 3 |
| 65 | 2 | 6 | 3 | 3 | 3 | 4 |
| 66 | 2 | 6 | 3 | 3 | 2 | 4 |
| 67 | 1 | 3 | 2 | 2 | 3 | 3 |
| 68 | 1 | 5 | 3 | 3 | 2 | 4 |
| 69 | 1 | 7 | 3 | 3 | 2 | 4 |
| 70 | 1 | 6 | 3 | 2 | 3 | 3 |
| 71 | 1 | 3 | 3 | 3 | 3 | 4 |
| 72 | 2 | 4 | 3 | 2 | 3 | 3 |
| 73 | 1 | 7 | 3 | 3 | 1 | 4 |
| 74 | 2 | 3 | 2 | 2 | 3 | 4 |
| 75 | 1 | 6 | 3 | 3 | 3 | 3 |
| 76 | 1 | 6 | 3 | 3 | 3 | 3 |
| 77 | 1 | 6 | 3 | 3 | 3 | 3 |
| 78 | 1 | 5 | 3 | 3 | 3 | 3 |
| 79 | 1 | 4 | 3 | 3 | 3 | 3 |
| 80 | 2 | 7 | 3 | 3 | 2 | 1 |
| 81 | 1 | 7 | 3 | 3 | 3 | 3 |
| 82 | 1 | 6 | 3 | 3 | 2 | 4 |
| 83 | 2 | 4 | 3 | 3 | 3 | 3 |
| 84 | 1 | 5 | 3 | 2 | 3 | 3 |
| 85 | 2 | 7 | 3 | 3 | 3 | 3 |
| 86 | 1 | 6 | 3 | 2 | 3 | 4 |
| 87 | 1 | 6 | 3 | 3 | 2 | 3 |
| 88 | 1 | 5 | 3 | 3 | 3 | 4 |
| 89 | 2 | 7 | 3 | 3 | 1 | 3 |
| 90 | 2 | 7 | 2 | 3 | 2 | 3 |
| 91 | 1 | 7 | 2 | 3 | 2 | 3 |
| 92 | 1 | 5 | 3 | 2 | 3 | 4 |
| 93 | 1 | 7 | 3 | 3 | 3 | 1 |
| 94 | 1 | 4 | 2 | 3 | 3 | 4 |
| 95 | 2 | 6 | 3 | 3 | 3 | 3 |

|     |   |   |   |   |   |   |
|-----|---|---|---|---|---|---|
| 96  | 1 | 7 | 3 | 3 | 3 | 4 |
| 97  | 1 | 7 | 3 | 3 | 3 | 3 |
| 98  | 1 | 7 | 3 | 2 | 3 | 4 |
| 99  | 2 | 5 | 3 | 3 | 3 | 4 |
| 100 | 1 | 7 | 3 | 3 | 2 | 4 |
| 101 | 2 | 7 | 3 | 2 | 3 | 4 |
| 102 | 1 | 3 | 2 | 2 | 2 | 4 |
| 103 | 1 | 5 | 3 | 3 | 3 | 4 |
| 104 | 1 | 6 | 3 | 2 | 3 | 4 |
| 105 | 1 | 4 | 3 | 3 | 1 | 4 |
| 106 | 2 | 6 | 2 | 2 | 3 | 4 |
| 107 | 2 | 7 | 3 | 3 | 3 | 4 |
| 108 | 1 | 5 | 3 | 3 | 3 | 3 |
| 109 | 1 | 2 | 2 | 3 | 3 | 3 |
| 110 | 1 | 6 | 3 | 3 | 3 | 4 |
| 111 | 2 | 5 | 3 | 2 | 3 | 3 |
| 112 | 1 | 3 | 3 | 3 | 2 | 3 |
| 113 | 1 | 3 | 2 | 3 | 3 | 3 |
| 114 | 2 | 5 | 3 | 3 | 3 | 3 |
| 115 | 1 | 3 | 3 | 3 | 3 | 4 |
| 116 | 1 | 6 | 3 | 2 | 3 | 4 |
| 117 | 2 | 6 | 3 | 2 | 3 | 3 |
| 118 | 1 | 6 | 3 | 3 | 2 | 3 |
| 119 | 2 | 5 | 2 | 3 | 2 | 4 |
| 120 | 1 | 3 | 3 | 3 | 2 | 3 |
| 121 | 1 | 3 | 3 | 3 | 3 | 3 |
| 122 | 1 | 7 | 3 | 3 | 3 | 3 |
| 123 | 1 | 5 | 3 | 3 | 1 | 3 |
| 124 | 1 | 4 | 3 | 3 | 2 | 4 |
| 125 | 1 | 6 | 3 | 3 | 2 | 1 |
| 126 | 2 | 7 | 3 | 3 | 2 | 4 |
| 127 | 2 | 2 | 2 | 3 | 1 | 4 |
| 128 | 1 | 7 | 3 | 3 | 3 | 3 |
| 129 | 1 | 3 | 3 | 3 | 2 | 4 |
| 130 | 1 | 2 | 2 | 2 | 3 | 4 |
| 131 | 2 | 6 | 2 | 3 | 2 | 3 |
| 132 | 2 | 5 | 2 | 3 | 3 | 4 |
| 133 | 1 | 6 | 3 | 3 | 1 | 4 |
| 134 | 1 | 4 | 3 | 3 | 2 | 4 |
| 135 | 1 | 7 | 3 | 3 | 2 | 4 |
| 136 | 2 | 3 | 3 | 3 | 2 | 3 |
| 137 | 2 | 2 | 2 | 3 | 2 | 4 |
| 138 | 2 | 3 | 2 | 3 | 3 | 4 |
| 139 | 1 | 5 | 3 | 3 | 1 | 4 |
| 140 | 1 | 5 | 3 | 3 | 2 | 4 |
| 141 | 2 | 4 | 3 | 3 | 3 | 4 |
| 142 | 2 | 6 | 3 | 3 | 1 | 4 |
| 143 | 1 | 6 | 3 | 3 | 2 | 3 |

|     |   |   |   |   |   |   |
|-----|---|---|---|---|---|---|
| 144 | 2 | 7 | 3 | 3 | 3 | 3 |
| 145 | 1 | 4 | 2 | 3 | 3 | 3 |
| 146 | 1 | 3 | 3 | 2 | 2 | 3 |
| 147 | 2 | 3 | 3 | 3 | 2 | 3 |
| 148 | 1 | 5 | 3 | 3 | 1 | 4 |
| 149 | 1 | 7 | 3 | 3 | 2 | 3 |
| 150 | 2 | 3 | 2 | 3 | 3 | 3 |
| 151 | 1 | 7 | 3 | 3 | 2 | 1 |
| 152 | 1 | 4 | 3 | 3 | 3 | 3 |
| 153 | 2 | 6 | 3 | 3 | 2 | 3 |
| 154 | 2 | 4 | 3 | 3 | 2 | 4 |
| 155 | 2 | 5 | 3 | 3 | 3 | 4 |
| 156 | 1 | 5 | 3 | 3 | 3 | 3 |
| 157 | 1 | 3 | 3 | 2 | 3 | 4 |
| 158 | 1 | 3 | 3 | 3 | 2 | 3 |
| 159 | 1 | 2 | 2 | 3 | 2 | 3 |
| 160 | 1 | 7 | 3 | 3 | 2 | 3 |
| 161 | 1 | 5 | 3 | 3 | 2 | 4 |
| 162 | 2 | 5 | 3 | 3 | 2 | 3 |
| 163 | 1 | 3 | 2 | 3 | 2 | 4 |
| 164 | 1 | 5 | 2 | 3 | 1 | 4 |
| 165 | 1 | 4 | 3 | 2 | 3 | 4 |
| 166 | 2 | 5 | 3 | 3 | 2 | 4 |
| 167 | 2 | 6 | 3 | 3 | 2 | 4 |
| 168 | 1 | 7 | 3 | 3 | 3 | 4 |
| 169 | 1 | 7 | 2 | 3 | 3 | 3 |
| 170 | 1 | 6 | 3 | 3 | 2 | 1 |
| 171 | 1 | 2 | 2 | 3 | 1 | 4 |
| 172 | 2 | 5 | 3 | 3 | 3 | 4 |
| 173 | 2 | 5 | 3 | 3 | 2 | 4 |
| 174 | 1 | 7 | 3 | 3 | 3 | 3 |
| 175 | 1 | 6 | 3 | 3 | 3 | 4 |
| 176 | 1 | 4 | 2 | 3 | 3 | 3 |
| 177 | 1 | 3 | 2 | 3 | 1 | 3 |
| 178 | 2 | 4 | 3 | 3 | 3 | 4 |
| 179 | 1 | 6 | 3 | 3 | 3 | 3 |
| 180 | 1 | 6 | 3 | 3 | 3 | 3 |
| 181 | 1 | 5 | 3 | 3 | 3 | 3 |
| 182 | 1 | 4 | 3 | 3 | 3 | 3 |
| 183 | 2 | 5 | 3 | 2 | 3 | 4 |
| 184 | 2 | 6 | 3 | 3 | 3 | 4 |
| 185 | 2 | 4 | 3 | 3 | 2 | 4 |
| 186 | 2 | 5 | 3 | 1 | 3 | 4 |
| 187 | 1 | 5 | 3 | 2 | 3 | 4 |
| 188 | 1 | 7 | 2 | 3 | 3 | 1 |
| 189 | 2 | 6 | 3 | 3 | 1 | 3 |
| 190 | 2 | 7 | 3 | 2 | 2 | 4 |
| 191 | 2 | 6 | 3 | 3 | 3 | 3 |

|     |   |   |   |   |   |   |
|-----|---|---|---|---|---|---|
| 192 | 1 | 7 | 3 | 2 | 3 | 3 |
| 193 | 1 | 5 | 3 | 3 | 3 | 4 |
| 194 | 1 | 6 | 3 | 2 | 2 | 4 |
| 195 | 1 | 6 | 2 | 3 | 2 | 4 |
| 196 | 1 | 4 | 3 | 3 | 2 | 4 |
| 197 | 2 | 7 | 3 | 3 | 2 | 3 |
| 198 | 1 | 7 | 3 | 3 | 3 | 4 |
| 199 | 1 | 6 | 3 | 3 | 3 | 4 |
| 200 | 1 | 5 | 3 | 3 | 3 | 4 |
| 201 | 1 | 6 | 3 | 3 | 1 | 4 |
| 202 | 1 | 3 | 2 | 3 | 2 | 4 |
| 203 | 1 | 7 | 3 | 2 | 3 | 4 |
| 204 | 1 | 7 | 3 | 3 | 2 | 3 |
| 205 | 1 | 4 | 3 | 3 | 3 | 4 |
| 206 | 2 | 6 | 3 | 3 | 1 | 3 |
| 207 | 1 | 5 | 3 | 3 | 1 | 3 |
| 208 | 1 | 3 | 3 | 3 | 1 | 3 |
| 209 | 1 | 4 | 3 | 3 | 2 | 4 |
| 210 | 1 | 5 | 3 | 3 | 2 | 4 |
| 211 | 2 | 4 | 3 | 3 | 3 | 4 |
| 212 | 2 | 4 | 3 | 3 | 3 | 1 |
| 213 | 2 | 4 | 3 | 3 | 3 | 3 |
| 214 | 2 | 5 | 3 | 3 | 3 | 4 |
| 215 | 2 | 7 | 3 | 3 | 3 | 3 |
| 216 | 2 | 5 | 3 | 3 | 2 | 4 |
| 217 | 1 | 7 | 3 | 3 | 3 | 4 |
| 218 | 2 | 7 | 3 | 3 | 3 | 3 |
| 219 | 1 | 6 | 3 | 3 | 3 | 3 |
| 220 | 1 | 6 | 3 | 3 | 3 | 2 |
| 221 | 2 | 4 | 3 | 3 | 2 | 4 |
| 222 | 1 | 5 | 3 | 3 | 3 | 4 |
| 223 | 2 | 7 | 3 | 3 | 2 | 4 |
| 224 | 1 | 5 | 3 | 3 | 2 | 4 |
| 225 | 2 | 4 | 3 | 3 | 2 | 3 |
| 226 | 1 | 5 | 3 | 3 | 3 | 4 |
| 227 | 1 | 5 | 3 | 3 | 3 | 3 |
| 228 | 1 | 6 | 3 | 3 | 2 | 3 |
| 229 | 1 | 5 | 2 | 3 | 3 | 4 |
| 230 | 1 | 7 | 3 | 1 | 3 | 3 |
| 231 | 1 | 5 | 3 | 3 | 2 | 4 |
| 232 | 1 | 7 | 3 | 3 | 1 | 4 |
| 233 | 1 | 6 | 3 | 2 | 3 | 4 |
| 234 | 2 | 6 | 3 | 3 | 2 | 3 |
| 235 | 1 | 7 | 2 | 3 | 3 | 3 |
| 236 | 2 | 7 | 3 | 3 | 3 | 4 |
| 237 | 1 | 7 | 3 | 3 | 2 | 3 |
| 238 | 1 | 3 | 2 | 3 | 2 | 3 |
| 239 | 1 | 6 | 3 | 2 | 3 | 4 |

|     |   |   |   |   |   |   |
|-----|---|---|---|---|---|---|
| 240 | 1 | 7 | 3 | 3 | 3 | 4 |
| 241 | 1 | 5 | 3 | 2 | 2 | 3 |
| 242 | 2 | 6 | 3 | 1 | 3 | 3 |
| 243 | 2 | 4 | 2 | 3 | 3 | 4 |
| 244 | 1 | 4 | 2 | 3 | 1 | 4 |
| 245 | 1 | 1 | 2 | 2 | 2 | 3 |
| 246 | 1 | 7 | 3 | 3 | 2 | 4 |
| 247 | 1 | 5 | 3 | 1 | 3 | 3 |
| 248 | 1 | 7 | 3 | 2 | 3 | 1 |
| 249 | 1 | 5 | 3 | 3 | 2 | 4 |
| 250 | 1 | 6 | 3 | 3 | 3 | 3 |
| 251 | 1 | 4 | 3 | 3 | 3 | 3 |
| 252 | 2 | 6 | 3 | 3 | 3 | 3 |
| 253 | 1 | 4 | 3 | 2 | 3 | 3 |
| 254 | 1 | 6 | 3 | 2 | 3 | 4 |
| 255 | 2 | 6 | 3 | 3 | 2 | 3 |
| 256 | 1 | 5 | 3 | 3 | 3 | 4 |
| 257 | 1 | 5 | 2 | 3 | 3 | 4 |
| 258 | 2 | 6 | 3 | 2 | 3 | 4 |
| 259 | 1 | 3 | 3 | 1 | 3 | 4 |
| 260 | 2 | 3 | 2 | 3 | 3 | 3 |
| 261 | 1 | 6 | 3 | 3 | 2 | 4 |
| 262 | 1 | 6 | 3 | 3 | 1 | 3 |
| 263 | 1 | 6 | 3 | 3 | 3 | 2 |
| 264 | 1 | 4 | 3 | 3 | 2 | 4 |
| 265 | 2 | 7 | 3 | 3 | 2 | 3 |
| 266 | 1 | 5 | 2 | 3 | 3 | 3 |
| 267 | 2 | 7 | 2 | 3 | 1 | 1 |
| 268 | 1 | 3 | 3 | 3 | 2 | 3 |
| 269 | 1 | 7 | 2 | 3 | 3 | 1 |
| 270 | 1 | 6 | 3 | 3 | 2 | 4 |
| 271 | 1 | 6 | 3 | 3 | 1 | 4 |
| 272 | 1 | 6 | 3 | 3 | 3 | 3 |
| 273 | 1 | 5 | 3 | 3 | 2 | 3 |
| 274 | 1 | 1 | 2 | 3 | 3 | 3 |
| 275 | 2 | 4 | 3 | 3 | 2 | 4 |
| 276 | 1 | 4 | 3 | 3 | 2 | 2 |
| 277 | 1 | 4 | 3 | 3 | 2 | 4 |
| 278 | 1 | 6 | 3 | 3 | 3 | 4 |
| 279 | 2 | 7 | 3 | 3 | 3 | 4 |
| 280 | 2 | 5 | 2 | 3 | 4 | 3 |
| 281 | 1 | 5 | 3 | 3 | 4 | 3 |
| 282 | 1 | 3 | 3 | 3 | 4 | 3 |
| 283 | 1 | 6 | 3 | 1 | 4 | 4 |
| 284 | 2 | 7 | 3 | 3 | 4 | 3 |
| 285 | 1 | 2 | 3 | 1 | 4 | 4 |
| 286 | 2 | 4 | 3 | 1 | 4 | 3 |
| 287 | 1 | 5 | 3 | 3 | 4 | 3 |

|     |   |   |   |   |   |   |
|-----|---|---|---|---|---|---|
| 288 | 1 | 5 | 3 | 1 | 4 | 4 |
| 289 | 1 | 6 | 3 | 1 | 4 | 4 |
| 290 | 2 | 3 | 3 | 1 | 4 | 3 |
| 291 | 1 | 2 | 2 | 3 | 4 | 3 |
| 292 | 1 | 7 | 2 | 2 | 4 | 3 |
| 293 | 1 | 2 | 2 | 1 | 4 | 4 |
| 294 | 1 | 5 | 3 | 1 | 4 | 3 |
| 295 | 2 | 4 | 3 | 1 | 4 | 4 |
| 296 | 1 | 1 | 2 | 1 | 4 | 4 |
| 297 | 1 | 3 | 2 | 1 | 4 | 4 |
| 298 | 2 | 5 | 3 | 1 | 4 | 3 |
| 299 | 1 | 1 | 2 | 1 | 4 | 3 |
| 300 | 2 | 6 | 3 | 3 | 4 | 4 |
| 301 | 2 | 2 | 2 | 1 | 4 | 4 |
| 302 | 2 | 6 | 2 | 1 | 4 | 3 |
| 303 | 2 | 2 | 2 | 1 | 4 | 3 |
| 304 | 1 | 7 | 3 | 1 | 4 | 4 |
| 305 | 1 | 7 | 3 | 1 | 4 | 2 |
| 306 | 1 | 3 | 3 | 2 | 4 | 3 |
| 307 | 1 | 6 | 3 | 3 | 4 | 4 |
| 308 | 1 | 1 | 2 | 1 | 4 | 3 |
| 309 | 2 | 6 | 3 | 1 | 4 | 3 |
| 310 | 2 | 6 | 3 | 1 | 4 | 4 |
| 311 | 1 | 5 | 3 | 1 | 4 | 3 |
| 312 | 1 | 6 | 3 | 3 | 4 | 4 |
| 313 | 1 | 7 | 3 | 2 | 4 | 3 |
| 314 | 2 | 7 | 3 | 2 | 4 | 3 |
| 315 | 1 | 3 | 3 | 1 | 4 | 2 |
| 316 | 1 | 7 | 2 | 3 | 4 | 3 |
| 317 | 2 | 4 | 3 | 3 | 4 | 3 |
| 318 | 1 | 2 | 3 | 1 | 4 | 4 |
| 319 | 1 | 4 | 3 | 1 | 4 | 3 |
| 320 | 1 | 6 | 2 | 3 | 4 | 4 |
| 321 | 2 | 7 | 2 | 1 | 4 | 3 |
| 322 | 2 | 7 | 3 | 1 | 4 | 3 |
| 323 | 1 | 4 | 2 | 1 | 4 | 4 |
| 324 | 1 | 3 | 3 | 2 | 4 | 4 |
| 325 | 2 | 6 | 3 | 2 | 4 | 3 |
| 326 | 2 | 3 | 3 | 1 | 4 | 3 |
| 327 | 1 | 6 | 3 | 1 | 4 | 3 |
| 328 | 1 | 1 | 2 | 1 | 4 | 3 |
| 329 | 2 | 5 | 3 | 1 | 4 | 4 |
| 330 | 1 | 6 | 3 | 1 | 4 | 4 |
| 331 | 1 | 4 | 3 | 1 | 4 | 3 |
| 332 | 2 | 5 | 2 | 1 | 4 | 4 |
| 333 | 2 | 7 | 3 | 1 | 4 | 3 |
| 334 | 2 | 2 | 2 | 1 | 4 | 3 |
| 335 | 2 | 5 | 3 | 1 | 4 | 4 |

|     |   |   |   |   |   |   |
|-----|---|---|---|---|---|---|
| 336 | 1 | 5 | 3 | 1 | 4 | 2 |
| 337 | 2 | 2 | 2 | 3 | 4 | 1 |
| 338 | 1 | 2 | 2 | 1 | 4 | 4 |
| 339 | 2 | 4 | 3 | 1 | 3 | 3 |
| 340 | 1 | 4 | 3 | 2 | 3 | 4 |
| 341 | 1 | 5 | 3 | 3 | 1 | 4 |
| 342 | 1 | 6 | 3 | 3 | 3 | 3 |
| 343 | 2 | 7 | 3 | 3 | 3 | 1 |
| 344 | 1 | 7 | 3 | 2 | 3 | 3 |
| 345 | 1 | 4 | 3 | 2 | 3 | 3 |
| 346 | 1 | 5 | 3 | 2 | 3 | 3 |
| 347 | 1 | 6 | 3 | 2 | 3 | 4 |
| 348 | 2 | 6 | 3 | 3 | 1 | 4 |
| 349 | 1 | 2 | 2 | 2 | 3 | 3 |
| 350 | 1 | 3 | 2 | 3 | 3 | 4 |
| 351 | 2 | 4 | 3 | 2 | 3 | 3 |
| 352 | 2 | 3 | 2 | 3 | 3 | 3 |
| 353 | 1 | 7 | 3 | 3 | 3 | 1 |
| 354 | 1 | 7 | 3 | 1 | 3 | 2 |
| 355 | 1 | 6 | 3 | 1 | 3 | 4 |
| 356 | 1 | 6 | 3 | 2 | 3 | 3 |
| 357 | 2 | 3 | 2 | 3 | 3 | 4 |
| 358 | 1 | 5 | 3 | 3 | 2 | 4 |
| 359 | 1 | 4 | 3 | 3 | 3 | 3 |
| 360 | 1 | 3 | 2 | 2 | 3 | 4 |
| 361 | 1 | 6 | 3 | 3 | 3 | 4 |
| 362 | 2 | 3 | 2 | 3 | 3 | 3 |
| 363 | 1 | 3 | 3 | 3 | 3 | 4 |
| 364 | 1 | 6 | 3 | 2 | 3 | 4 |
| 365 | 1 | 5 | 3 | 3 | 3 | 3 |
| 366 | 2 | 5 | 3 | 3 | 3 | 4 |
| 367 | 1 | 6 | 3 | 3 | 3 | 4 |
| 368 | 1 | 3 | 3 | 2 | 3 | 4 |
| 369 | 1 | 7 | 3 | 3 | 1 | 4 |
| 370 | 2 | 5 | 3 | 3 | 3 | 4 |
| 371 | 2 | 7 | 3 | 2 | 3 | 4 |
| 372 | 1 | 5 | 3 | 3 | 1 | 1 |
| 373 | 1 | 6 | 3 | 3 | 3 | 4 |
| 374 | 1 | 7 | 3 | 3 | 2 | 1 |
| 375 | 1 | 5 | 3 | 3 | 3 | 4 |
| 376 | 2 | 3 | 3 | 1 | 3 | 4 |
| 377 | 2 | 2 | 2 | 3 | 3 | 3 |
| 378 | 1 | 2 | 2 | 3 | 3 | 4 |
| 379 | 1 | 6 | 3 | 3 | 1 | 3 |
| 380 | 1 | 3 | 3 | 3 | 3 | 3 |
| 381 | 2 | 5 | 3 | 3 | 3 | 4 |
| 382 | 1 | 4 | 3 | 1 | 3 | 4 |
| 383 | 2 | 6 | 3 | 3 | 3 | 4 |



|     |   |   |   |   |   |   |
|-----|---|---|---|---|---|---|
| 384 | 1 | 5 | 3 | 1 | 4 | 3 |
| 385 | 1 | 5 | 3 | 1 | 4 | 3 |
| 386 | 2 | 2 | 2 | 2 | 4 | 3 |
| 387 | 1 | 5 | 3 | 1 | 4 | 4 |
| 388 | 1 | 6 | 3 | 2 | 4 | 4 |
| 389 | 2 | 6 | 3 | 2 | 4 | 4 |
| 390 | 1 | 5 | 3 | 1 | 4 | 3 |
| 391 | 1 | 6 | 3 | 2 | 4 | 3 |
| 392 | 2 | 6 | 3 | 1 | 4 | 4 |
| 393 | 1 | 2 | 2 | 1 | 4 | 4 |
| 394 | 1 | 4 | 3 | 1 | 4 | 1 |
| 395 | 2 | 3 | 3 | 2 | 4 | 3 |
| 396 | 1 | 7 | 3 | 1 | 4 | 4 |
| 397 | 1 | 4 | 3 | 1 | 4 | 4 |
| 398 | 1 | 6 | 3 | 1 | 4 | 3 |
| 399 | 2 | 4 | 3 | 1 | 4 | 4 |
| 400 | 1 | 4 | 3 | 1 | 4 | 4 |
| 401 | 1 | 5 | 3 | 1 | 4 | 3 |
| 402 | 2 | 6 | 3 | 2 | 4 | 4 |
| 403 | 1 | 5 | 3 | 1 | 4 | 4 |
| 404 | 1 | 7 | 3 | 2 | 4 | 4 |
| 405 | 1 | 6 | 3 | 1 | 4 | 3 |
| 406 | 1 | 6 | 3 | 2 | 4 | 3 |
| 407 | 1 | 4 | 3 | 1 | 4 | 3 |
| 408 | 1 | 7 | 3 | 1 | 4 | 3 |
| 409 | 1 | 6 | 3 | 2 | 4 | 4 |
| 410 | 1 | 2 | 3 | 1 | 4 | 3 |
| 411 | 1 | 4 | 3 | 1 | 4 | 4 |
| 412 | 1 | 5 | 3 | 1 | 4 | 4 |
| 413 | 2 | 3 | 2 | 1 | 4 | 4 |
| 414 | 1 | 2 | 2 | 1 | 4 | 3 |
| 415 | 1 | 5 | 3 | 2 | 4 | 3 |
| 416 | 1 | 6 | 3 | 1 | 4 | 3 |
| 417 | 2 | 5 | 3 | 2 | 4 | 4 |
| 418 | 1 | 6 | 3 | 1 | 4 | 4 |
| 419 | 1 | 6 | 3 | 1 | 4 | 3 |
| 420 | 1 | 5 | 3 | 1 | 4 | 4 |
| 421 | 1 | 5 | 3 | 1 | 4 | 2 |
| 422 | 1 | 4 | 3 | 1 | 4 | 4 |
| 423 | 1 | 4 | 3 | 2 | 4 | 4 |
| 424 | 2 | 6 | 3 | 1 | 4 | 3 |
| 425 | 1 | 3 | 3 | 1 | 4 | 3 |
| 426 | 1 | 5 | 3 | 2 | 4 | 2 |
| 427 | 1 | 6 | 3 | 1 | 4 | 3 |
| 428 | 2 | 4 | 3 | 1 | 4 | 3 |
| 429 | 2 | 5 | 3 | 3 | 4 | 4 |
| 430 | 2 | 3 | 2 | 2 | 4 | 3 |
| 431 | 1 | 1 | 2 | 1 | 4 | 3 |

|     |   |   |   |   |   |   |
|-----|---|---|---|---|---|---|
| 432 | 2 | 5 | 3 | 1 | 4 | 4 |
| 433 | 1 | 6 | 3 | 1 | 4 | 4 |
| 434 | 1 | 4 | 3 | 1 | 4 | 3 |
| 435 | 1 | 4 | 3 | 1 | 4 | 4 |
| 436 | 1 | 5 | 3 | 1 | 4 | 4 |
| 437 | 1 | 5 | 3 | 1 | 4 | 4 |
| 438 | 1 | 5 | 3 | 1 | 4 | 2 |
| 439 | 2 | 4 | 3 | 1 | 4 | 4 |
| 440 | 2 | 6 | 3 | 1 | 4 | 4 |
| 441 | 1 | 2 | 2 | 1 | 4 | 3 |
| 442 | 1 | 5 | 3 | 1 | 4 | 3 |
| 443 | 2 | 6 | 3 | 2 | 4 | 4 |
| 444 | 1 | 4 | 3 | 1 | 4 | 3 |
| 445 | 1 | 4 | 3 | 1 | 4 | 3 |
| 446 | 2 | 4 | 3 | 1 | 4 | 4 |
| 447 | 1 | 6 | 3 | 2 | 4 | 2 |
| 448 | 1 | 2 | 2 | 2 | 4 | 4 |
| 449 | 1 | 3 | 2 | 1 | 3 | 3 |
| 450 | 1 | 7 | 3 | 2 | 3 | 4 |
| 451 | 1 | 6 | 3 | 3 | 3 | 3 |
| 452 | 1 | 6 | 3 | 3 | 1 | 1 |
| 453 | 1 | 7 | 3 | 2 | 3 | 3 |
| 454 | 1 | 6 | 3 | 3 | 3 | 3 |
| 455 | 2 | 6 | 3 | 3 | 3 | 4 |
| 456 | 2 | 4 | 3 | 3 | 1 | 4 |
| 457 | 1 | 7 | 3 | 2 | 3 | 2 |
| 458 | 2 | 5 | 3 | 1 | 3 | 4 |
| 459 | 2 | 6 | 3 | 3 | 3 | 4 |
| 460 | 1 | 5 | 3 | 3 | 2 | 3 |
| 461 | 1 | 7 | 3 | 3 | 2 | 4 |
| 462 | 1 | 6 | 3 | 1 | 3 | 3 |
| 463 | 1 | 5 | 3 | 3 | 1 | 3 |
| 464 | 1 | 3 | 3 | 3 | 3 | 4 |
| 465 | 1 | 3 | 2 | 2 | 3 | 4 |
| 466 | 2 | 2 | 2 | 1 | 3 | 4 |
| 467 | 1 | 4 | 3 | 3 | 3 | 4 |
| 468 | 1 | 6 | 3 | 2 | 3 | 4 |
| 469 | 1 | 5 | 3 | 2 | 3 | 4 |
| 470 | 1 | 6 | 3 | 3 | 3 | 4 |
| 471 | 2 | 5 | 3 | 3 | 3 | 4 |
| 472 | 2 | 5 | 3 | 3 | 2 | 4 |
| 473 | 2 | 5 | 3 | 1 | 3 | 4 |
| 474 | 1 | 3 | 2 | 1 | 3 | 3 |
| 475 | 1 | 3 | 3 | 2 | 2 | 4 |
| 476 | 1 | 5 | 3 | 2 | 3 | 4 |
| 477 | 1 | 5 | 3 | 3 | 1 | 4 |
| 478 | 2 | 7 | 3 | 3 | 3 | 4 |
| 479 | 1 | 5 | 3 | 3 | 2 | 3 |

|     |   |   |   |   |   |   |
|-----|---|---|---|---|---|---|
| 480 | 1 | 5 | 3 | 3 | 3 | 4 |
| 481 | 2 | 7 | 3 | 3 | 3 | 4 |
| 482 | 2 | 6 | 3 | 2 | 3 | 4 |
| 483 | 1 | 7 | 3 | 3 | 2 | 3 |
| 484 | 2 | 5 | 3 | 1 | 3 | 4 |
| 485 | 2 | 7 | 3 | 3 | 2 | 4 |
| 486 | 1 | 3 | 3 | 1 | 3 | 4 |
| 487 | 2 | 5 | 3 | 2 | 3 | 3 |
| 488 | 2 | 6 | 3 | 3 | 3 | 3 |
| 489 | 1 | 4 | 3 | 3 | 2 | 4 |
| 490 | 1 | 5 | 3 | 3 | 1 | 3 |
| 491 | 1 | 6 | 3 | 3 | 3 | 4 |
| 492 | 1 | 7 | 3 | 2 | 3 | 4 |
| 493 | 1 | 6 | 3 | 3 | 2 | 3 |
| 494 | 1 | 7 | 3 | 3 | 3 | 4 |
| 495 | 1 | 5 | 3 | 3 | 3 | 4 |
| 496 | 1 | 5 | 3 | 3 | 2 | 3 |
| 497 | 2 | 5 | 3 | 3 | 1 | 4 |
| 498 | 1 | 7 | 3 | 1 | 3 | 4 |
| 499 | 1 | 1 | 2 | 1 | 3 | 4 |
| 500 | 1 | 4 | 3 | 3 | 3 | 4 |
| 501 | 1 | 2 | 2 | 2 | 3 | 4 |
| 502 | 2 | 5 | 3 | 3 | 3 | 4 |
| 503 | 1 | 5 | 3 | 1 | 4 | 3 |
| 504 | 1 | 4 | 3 | 1 | 4 | 2 |
| 505 | 1 | 5 | 3 | 1 | 4 | 4 |
| 506 | 1 | 3 | 3 | 1 | 4 | 3 |
| 507 | 1 | 7 | 3 | 1 | 4 | 3 |
| 508 | 1 | 5 | 3 | 1 | 4 | 2 |
| 509 | 1 | 6 | 3 | 2 | 4 | 3 |
| 510 | 2 | 3 | 3 | 1 | 4 | 3 |
| 511 | 2 | 6 | 3 | 1 | 4 | 3 |
| 512 | 1 | 6 | 3 | 1 | 4 | 3 |
| 513 | 1 | 5 | 3 | 1 | 4 | 4 |
| 514 | 1 | 5 | 3 | 2 | 4 | 4 |
| 515 | 1 | 6 | 3 | 1 | 4 | 3 |
| 516 | 1 | 5 | 3 | 1 | 4 | 3 |
| 517 | 1 | 3 | 3 | 2 | 4 | 3 |
| 518 | 1 | 6 | 3 | 1 | 4 | 4 |
| 519 | 1 | 7 | 3 | 2 | 4 | 1 |
| 520 | 1 | 5 | 3 | 2 | 4 | 3 |
| 521 | 1 | 2 | 2 | 1 | 4 | 4 |
| 522 | 1 | 5 | 3 | 1 | 4 | 4 |
| 523 | 1 | 7 | 3 | 1 | 4 | 3 |
| 524 | 1 | 6 | 3 | 1 | 4 | 3 |
| 525 | 1 | 6 | 3 | 1 | 4 | 3 |
| 526 | 1 | 1 | 2 | 1 | 4 | 4 |
| 527 | 2 | 6 | 3 | 1 | 4 | 3 |

|     |   |   |   |   |   |   |
|-----|---|---|---|---|---|---|
| 528 | 2 | 6 | 3 | 2 | 4 | 2 |
| 529 | 2 | 7 | 3 | 1 | 4 | 3 |
| 530 | 1 | 5 | 3 | 1 | 4 | 3 |
| 531 | 2 | 7 | 3 | 1 | 4 | 3 |
| 532 | 2 | 5 | 3 | 1 | 4 | 3 |
| 533 | 2 | 6 | 3 | 1 | 4 | 3 |
| 534 | 1 | 6 | 3 | 1 | 4 | 3 |
| 535 | 2 | 5 | 3 | 1 | 4 | 3 |
| 536 | 1 | 6 | 3 | 1 | 4 | 4 |
| 537 | 1 | 4 | 3 | 1 | 4 | 3 |
| 538 | 1 | 4 | 3 | 1 | 4 | 3 |
| 539 | 1 | 5 | 3 | 1 | 4 | 3 |
| 540 | 1 | 4 | 3 | 1 | 4 | 3 |
| 541 | 2 | 7 | 3 | 2 | 4 | 3 |
| 542 | 1 | 6 | 3 | 1 | 4 | 3 |
| 543 | 1 | 6 | 3 | 1 | 4 | 3 |
| 544 | 1 | 6 | 3 | 1 | 4 | 4 |
| 545 | 1 | 5 | 3 | 1 | 4 | 3 |
| 546 | 1 | 5 | 3 | 1 | 4 | 3 |
| 547 | 1 | 5 | 3 | 1 | 4 | 3 |
| 548 | 1 | 2 | 2 | 1 | 4 | 4 |
| 549 | 1 | 7 | 3 | 1 | 4 | 3 |
| 550 | 2 | 4 | 3 | 1 | 4 | 3 |
| 551 | 2 | 5 | 3 | 1 | 4 | 4 |
| 552 | 2 | 2 | 2 | 2 | 4 | 4 |
| 553 | 1 | 7 | 3 | 2 | 4 | 4 |
| 554 | 1 | 3 | 3 | 2 | 4 | 4 |
| 555 | 1 | 6 | 3 | 1 | 4 | 4 |
| 556 | 1 | 6 | 3 | 2 | 4 | 3 |
| 557 | 2 | 6 | 3 | 1 | 4 | 4 |
| 558 | 1 | 1 | 2 | 1 | 4 | 4 |
| 559 | 1 | 7 | 3 | 1 | 4 | 4 |
| 560 | 1 | 5 | 3 | 2 | 4 | 3 |
| 561 | 1 | 5 | 3 | 1 | 4 | 3 |
| 562 | 1 | 6 | 3 | 1 | 4 | 4 |
| 563 | 1 | 6 | 3 | 1 | 4 | 3 |
| 564 | 2 | 5 | 3 | 1 | 4 | 3 |
| 565 | 1 | 7 | 3 | 2 | 4 | 4 |
| 566 | 1 | 6 | 3 | 1 | 4 | 3 |
| 567 | 1 | 3 | 3 | 1 | 4 | 3 |
| 568 | 1 | 3 | 3 | 2 | 4 | 4 |
| 569 | 1 | 3 | 3 | 1 | 4 | 3 |
| 570 | 1 | 6 | 3 | 2 | 4 | 4 |
| 571 | 1 | 7 | 3 | 1 | 4 | 3 |
| 572 | 1 | 4 | 3 | 1 | 4 | 4 |
| 573 | 1 | 5 | 3 | 2 | 4 | 3 |
| 574 | 1 | 5 | 3 | 2 | 4 | 4 |
| 575 | 2 | 4 | 3 | 2 | 4 | 4 |

|     |   |   |   |   |   |   |
|-----|---|---|---|---|---|---|
| 576 | 1 | 5 | 3 | 2 | 4 | 4 |
| 577 | 1 | 5 | 3 | 1 | 4 | 4 |
| 578 | 2 | 5 | 3 | 1 | 4 | 4 |
| 579 | 2 | 6 | 3 | 2 | 4 | 3 |
| 580 | 1 | 3 | 3 | 1 | 4 | 4 |
| 581 | 2 | 6 | 3 | 1 | 4 | 3 |
| 582 | 1 | 7 | 3 | 1 | 4 | 2 |
| 583 | 2 | 1 | 2 | 1 | 4 | 3 |
| 584 | 1 | 6 | 3 | 2 | 4 | 2 |
| 585 | 1 | 6 | 3 | 1 | 4 | 4 |
| 586 | 1 | 5 | 3 | 1 | 4 | 4 |
| 587 | 2 | 6 | 3 | 2 | 4 | 4 |
| 588 | 1 | 7 | 3 | 2 | 4 | 4 |
| 589 | 1 | 4 | 3 | 2 | 4 | 4 |
| 590 | 1 | 5 | 3 | 1 | 4 | 3 |
| 591 | 1 | 5 | 3 | 1 | 4 | 3 |
| 592 | 2 | 5 | 3 | 2 | 4 | 2 |
| 593 | 1 | 4 | 3 | 1 | 4 | 4 |
| 594 | 1 | 6 | 3 | 3 | 4 | 4 |
| 595 | 1 | 6 | 3 | 3 | 3 | 4 |
| 596 | 2 | 6 | 3 | 2 | 3 | 4 |
| 597 | 1 | 3 | 3 | 3 | 1 | 4 |
| 598 | 1 | 2 | 2 | 1 | 3 | 4 |
| 599 | 1 | 4 | 3 | 3 | 3 | 4 |
| 600 | 1 | 4 | 3 | 3 | 2 | 3 |
| 601 | 1 | 4 | 3 | 3 | 3 | 3 |
| 602 | 2 | 5 | 3 | 2 | 3 | 3 |
| 603 | 1 | 2 | 2 | 3 | 3 | 4 |
| 604 | 1 | 6 | 3 | 3 | 3 | 4 |
| 605 | 2 | 4 | 3 | 3 | 3 | 4 |
| 606 | 2 | 6 | 3 | 3 | 2 | 4 |
| 607 | 1 | 7 | 3 | 1 | 3 | 4 |
| 608 | 2 | 6 | 3 | 3 | 3 | 4 |
| 609 | 2 | 4 | 3 | 3 | 3 | 3 |
| 610 | 1 | 6 | 3 | 3 | 3 | 4 |
| 611 | 1 | 3 | 3 | 3 | 2 | 4 |
| 612 | 1 | 5 | 3 | 3 | 2 | 3 |
| 613 | 2 | 7 | 3 | 3 | 3 | 4 |
| 614 | 1 | 7 | 3 | 3 | 3 | 4 |
| 615 | 2 | 7 | 3 | 3 | 3 | 3 |
| 616 | 1 | 4 | 3 | 3 | 3 | 4 |
| 617 | 1 | 5 | 3 | 2 | 3 | 4 |
| 618 | 2 | 2 | 2 | 3 | 3 | 4 |
| 619 | 1 | 6 | 3 | 3 | 3 | 3 |
| 620 | 2 | 6 | 3 | 2 | 3 | 4 |
| 621 | 1 | 4 | 3 | 3 | 3 | 4 |
| 622 | 2 | 7 | 2 | 3 | 3 | 3 |
| 623 | 1 | 6 | 3 | 3 | 3 | 4 |

|     |   |   |   |   |   |   |
|-----|---|---|---|---|---|---|
| 624 | 2 | 3 | 3 | 3 | 4 | 4 |
| 625 | 1 | 7 | 3 | 2 | 4 | 3 |
| 626 | 1 | 5 | 3 | 3 | 4 | 4 |
| 627 | 1 | 7 | 3 | 1 | 4 | 3 |
| 628 | 2 | 3 | 3 | 2 | 4 | 4 |
| 629 | 1 | 3 | 2 | 1 | 4 | 3 |
| 630 | 1 | 5 | 3 | 3 | 4 | 4 |
| 631 | 1 | 3 | 3 | 2 | 4 | 4 |
| 632 | 1 | 6 | 3 | 2 | 4 | 4 |
| 633 | 2 | 6 | 3 | 3 | 4 | 3 |
| 634 | 1 | 5 | 3 | 3 | 4 | 4 |
| 635 | 2 | 5 | 3 | 2 | 4 | 4 |
| 636 | 1 | 3 | 3 | 2 | 3 | 4 |
| 637 | 1 | 5 | 3 | 3 | 2 | 3 |
| 638 | 1 | 6 | 3 | 3 | 3 | 3 |
| 639 | 1 | 3 | 3 | 3 | 2 | 4 |
| 640 | 1 | 4 | 3 | 2 | 3 | 4 |
| 641 | 1 | 2 | 2 | 2 | 3 | 4 |
| 642 | 2 | 6 | 3 | 2 | 3 | 4 |
| 643 | 2 | 5 | 3 | 2 | 3 | 4 |
| 644 | 1 | 4 | 3 | 2 | 3 | 3 |
| 645 | 2 | 4 | 3 | 3 | 3 | 4 |
| 646 | 2 | 7 | 3 | 3 | 3 | 4 |
| 647 | 1 | 5 | 3 | 3 | 3 | 4 |
| 648 | 2 | 6 | 3 | 3 | 3 | 4 |
| 649 | 1 | 1 | 2 | 1 | 3 | 4 |
| 650 | 1 | 4 | 3 | 3 | 2 | 3 |
| 651 | 1 | 4 | 3 | 2 | 3 | 4 |
| 652 | 1 | 3 | 3 | 3 | 3 | 4 |
| 653 | 2 | 4 | 3 | 3 | 3 | 3 |
| 654 | 2 | 5 | 3 | 3 | 2 | 4 |
| 655 | 2 | 3 | 3 | 3 | 3 | 3 |
| 656 | 1 | 6 | 3 | 3 | 3 | 4 |
| 657 | 1 | 2 | 3 | 3 | 3 | 3 |
| 658 | 2 | 5 | 3 | 2 | 3 | 3 |
| 659 | 2 | 2 | 2 | 3 | 3 | 4 |
| 660 | 1 | 4 | 3 | 3 | 3 | 4 |
| 661 | 1 | 5 | 3 | 3 | 3 | 3 |
| 662 | 1 | 4 | 3 | 3 | 1 | 4 |
| 663 | 2 | 6 | 3 | 3 | 3 | 3 |
| 664 | 2 | 4 | 3 | 3 | 3 | 3 |
| 665 | 2 | 7 | 3 | 2 | 3 | 3 |
| 666 | 2 | 2 | 2 | 2 | 1 | 4 |
| 667 | 1 | 3 | 3 | 3 | 3 | 4 |
| 668 | 1 | 3 | 3 | 3 | 1 | 4 |
| 669 | 1 | 6 | 3 | 3 | 3 | 4 |
| 670 | 1 | 6 | 3 | 3 | 3 | 4 |
| 671 | 2 | 4 | 3 | 3 | 3 | 4 |

|     |   |   |   |   |   |   |
|-----|---|---|---|---|---|---|
| 672 | 1 | 6 | 3 | 2 | 3 | 4 |
| 673 | 1 | 6 | 3 | 2 | 3 | 4 |
| 674 | 2 | 3 | 2 | 3 | 3 | 3 |
| 675 | 1 | 4 | 3 | 2 | 3 | 4 |
| 676 | 1 | 6 | 3 | 2 | 3 | 4 |
| 677 | 1 | 6 | 3 | 3 | 3 | 4 |
| 678 | 2 | 4 | 3 | 2 | 3 | 3 |
| 679 | 2 | 5 | 3 | 3 | 1 | 4 |
| 680 | 2 | 2 | 2 | 3 | 3 | 4 |
| 681 | 1 | 7 | 3 | 3 | 3 | 4 |
| 682 | 1 | 2 | 2 | 3 | 3 | 4 |
| 683 | 1 | 5 | 3 | 3 | 3 | 4 |
| 684 | 1 | 5 | 3 | 3 | 2 | 4 |
| 685 | 2 | 4 | 3 | 3 | 3 | 3 |
| 686 | 1 | 3 | 2 | 2 | 3 | 4 |
| 687 | 1 | 3 | 3 | 3 | 3 | 4 |
| 688 | 1 | 5 | 3 | 3 | 3 | 4 |
| 689 | 1 | 5 | 3 | 3 | 3 | 4 |
| 690 | 1 | 3 | 3 | 3 | 3 | 4 |
| 691 | 1 | 6 | 3 | 3 | 1 | 4 |
| 692 | 1 | 7 | 3 | 2 | 3 | 4 |
| 693 | 1 | 6 | 3 | 3 | 3 | 4 |
| 694 | 2 | 6 | 3 | 2 | 2 | 4 |
| 695 | 1 | 4 | 3 | 3 | 2 | 4 |
| 696 | 1 | 6 | 3 | 3 | 2 | 4 |
| 697 | 2 | 1 | 2 | 1 | 3 | 3 |
| 698 | 1 | 4 | 3 | 3 | 3 | 4 |
| 699 | 1 | 3 | 3 | 1 | 3 | 3 |
| 700 | 1 | 6 | 3 | 3 | 3 | 4 |
| 701 | 2 | 7 | 3 | 1 | 3 | 3 |
| 702 | 1 | 5 | 3 | 3 | 2 | 4 |
| 703 | 1 | 2 | 2 | 3 | 2 | 4 |
| 704 | 2 | 4 | 3 | 3 | 2 | 4 |
| 705 | 2 | 4 | 3 | 3 | 2 | 4 |
| 706 | 1 | 5 | 3 | 3 | 3 | 4 |
| 707 | 1 | 6 | 1 | 3 | 2 | 3 |
| 708 | 1 | 5 | 3 | 3 | 3 | 3 |
| 709 | 1 | 6 | 3 | 1 | 3 | 4 |
| 710 | 1 | 4 | 3 | 3 | 3 | 4 |
| 711 | 1 | 5 | 3 | 3 | 2 | 4 |
| 712 | 1 | 4 | 3 | 3 | 3 | 4 |
| 713 | 2 | 1 | 2 | 3 | 1 | 3 |
| 714 | 1 | 4 | 3 | 3 | 3 | 4 |
| 715 | 2 | 3 | 3 | 3 | 1 | 4 |
| 716 | 2 | 4 | 3 | 2 | 2 | 3 |
| 717 | 1 | 6 | 3 | 3 | 2 | 4 |
| 718 | 1 | 3 | 3 | 3 | 2 | 4 |
| 719 | 1 | 5 | 3 | 3 | 2 | 4 |

|     |   |   |   |   |   |   |
|-----|---|---|---|---|---|---|
| 720 | 2 | 2 | 3 | 3 | 3 | 4 |
| 721 | 2 | 3 | 3 | 3 | 2 | 4 |
| 722 | 1 | 2 | 2 | 3 | 1 | 4 |
| 723 | 2 | 6 | 3 | 2 | 3 | 4 |
| 724 | 1 | 7 | 3 | 2 | 3 | 4 |
| 725 | 1 | 2 | 2 | 3 | 3 | 4 |
| 726 | 2 | 5 | 3 | 3 | 1 | 4 |
| 727 | 2 | 5 | 3 | 3 | 3 | 4 |
| 728 | 1 | 6 | 3 | 3 | 3 | 4 |
| 729 | 2 | 7 | 3 | 2 | 2 | 4 |
| 730 | 1 | 4 | 3 | 3 | 2 | 4 |
| 731 | 1 | 4 | 3 | 3 | 3 | 3 |
| 732 | 1 | 6 | 3 | 3 | 2 | 4 |
| 733 | 2 | 7 | 3 | 1 | 3 | 4 |
| 734 | 1 | 6 | 3 | 3 | 3 | 4 |
| 735 | 1 | 6 | 3 | 3 | 2 | 3 |
| 736 | 1 | 3 | 3 | 3 | 2 | 4 |
| 737 | 2 | 7 | 3 | 3 | 3 | 4 |
| 738 | 1 | 6 | 3 | 3 | 3 | 4 |
| 739 | 2 | 2 | 3 | 3 | 1 | 4 |
| 740 | 1 | 1 | 2 | 1 | 3 | 4 |
| 741 | 1 | 5 | 3 | 3 | 3 | 4 |
| 742 | 2 | 6 | 3 | 3 | 2 | 4 |
| 743 | 1 | 3 | 3 | 3 | 1 | 3 |
| 744 | 2 | 5 | 3 | 2 | 3 | 4 |
| 745 | 2 | 5 | 3 | 3 | 3 | 4 |
| 746 | 1 | 3 | 3 | 3 | 3 | 4 |
| 747 | 1 | 4 | 3 | 3 | 3 | 3 |
| 748 | 1 | 3 | 3 | 3 | 1 | 4 |
| 749 | 2 | 7 | 3 | 2 | 3 | 3 |
| 750 | 1 | 5 | 3 | 3 | 3 | 4 |
| 751 | 2 | 2 | 2 | 2 | 3 | 4 |
| 752 | 1 | 7 | 3 | 2 | 3 | 4 |
| 753 | 1 | 2 | 2 | 1 | 4 | 4 |
| 754 | 1 | 6 | 3 | 1 | 4 | 3 |
| 755 | 1 | 3 | 3 | 1 | 4 | 4 |
| 756 | 1 | 4 | 3 | 1 | 4 | 4 |
| 757 | 2 | 6 | 3 | 2 | 4 | 4 |
| 758 | 1 | 7 | 3 | 1 | 4 | 3 |
| 759 | 1 | 7 | 3 | 3 | 4 | 4 |
| 760 | 1 | 1 | 2 | 1 | 4 | 4 |
| 761 | 1 | 7 | 3 | 3 | 4 | 3 |
| 762 | 2 | 7 | 3 | 2 | 4 | 3 |
| 763 | 1 | 5 | 3 | 1 | 4 | 3 |
| 764 | 1 | 5 | 3 | 3 | 4 | 3 |
| 765 | 1 | 5 | 3 | 2 | 4 | 3 |
| 766 | 2 | 6 | 3 | 1 | 4 | 4 |
| 767 | 1 | 6 | 3 | 1 | 4 | 4 |



|     |   |   |   |   |   |   |
|-----|---|---|---|---|---|---|
| 768 | 2 | 7 | 3 | 1 | 4 | 4 |
| 769 | 1 | 5 | 3 | 1 | 4 | 4 |
| 770 | 2 | 4 | 3 | 1 | 4 | 4 |
| 771 | 1 | 2 | 2 | 1 | 4 | 4 |
| 772 | 1 | 5 | 3 | 1 | 4 | 4 |
| 773 | 1 | 5 | 3 | 3 | 4 | 3 |
| 774 | 2 | 3 | 3 | 1 | 4 | 3 |
| 775 | 1 | 5 | 3 | 1 | 4 | 4 |
| 776 | 1 | 3 | 3 | 2 | 4 | 4 |
| 777 | 1 | 3 | 3 | 2 | 4 | 4 |
| 778 | 1 | 5 | 3 | 1 | 4 | 4 |
| 779 | 1 | 6 | 3 | 3 | 4 | 4 |
| 780 | 1 | 5 | 3 | 1 | 4 | 4 |
| 781 | 2 | 7 | 3 | 1 | 4 | 4 |
| 782 | 1 | 3 | 3 | 1 | 4 | 4 |
| 783 | 1 | 6 | 3 | 1 | 4 | 3 |
| 784 | 1 | 2 | 2 | 1 | 4 | 4 |
| 785 | 1 | 5 | 3 | 1 | 4 | 3 |
| 786 | 1 | 2 | 2 | 3 | 4 | 4 |
| 787 | 1 | 4 | 3 | 1 | 4 | 4 |
| 788 | 1 | 6 | 3 | 1 | 4 | 3 |
| 789 | 1 | 4 | 2 | 1 | 4 | 4 |
| 790 | 1 | 6 | 3 | 3 | 4 | 3 |
| 791 | 1 | 5 | 3 | 1 | 4 | 3 |
| 792 | 2 | 3 | 3 | 1 | 4 | 4 |
| 793 | 1 | 2 | 2 | 1 | 4 | 4 |
| 794 | 1 | 5 | 3 | 1 | 4 | 4 |
| 795 | 1 | 6 | 3 | 2 | 4 | 3 |
| 796 | 2 | 2 | 2 | 2 | 4 | 4 |
| 797 | 2 | 7 | 3 | 1 | 3 | 4 |
| 798 | 1 | 5 | 3 | 3 | 4 | 3 |
| 799 | 2 | 3 | 3 | 1 | 4 | 4 |
| 800 | 1 | 6 | 3 | 3 | 3 | 4 |
| 801 | 1 | 3 | 3 | 2 | 3 | 4 |
| 802 | 1 | 6 | 3 | 3 | 3 | 4 |
| 803 | 1 | 7 | 3 | 3 | 3 | 4 |
| 804 | 1 | 5 | 3 | 1 | 3 | 4 |
| 805 | 2 | 5 | 3 | 2 | 3 | 4 |
| 806 | 2 | 3 | 3 | 1 | 3 | 3 |
| 807 | 1 | 2 | 2 | 3 | 3 | 4 |
| 808 | 1 | 7 | 3 | 2 | 3 | 4 |
| 809 | 1 | 5 | 3 | 3 | 3 | 3 |
| 810 | 1 | 3 | 2 | 1 | 3 | 3 |
| 811 | 2 | 5 | 3 | 2 | 3 | 3 |
| 812 | 1 | 5 | 3 | 2 | 3 | 3 |
| 813 | 2 | 4 | 3 | 1 | 3 | 3 |
| 814 | 1 | 3 | 3 | 3 | 3 | 3 |
| 815 | 1 | 4 | 3 | 1 | 2 | 4 |

|     |   |   |   |   |   |   |
|-----|---|---|---|---|---|---|
| 816 | 1 | 3 | 2 | 3 | 3 | 4 |
| 817 | 1 | 6 | 3 | 2 | 3 | 4 |
| 818 | 2 | 5 | 3 | 1 | 3 | 4 |
| 819 | 1 | 5 | 3 | 1 | 3 | 3 |
| 820 | 1 | 5 | 3 | 2 | 3 | 4 |
| 821 | 2 | 4 | 3 | 2 | 3 | 4 |
| 822 | 1 | 6 | 3 | 2 | 3 | 3 |
| 823 | 2 | 5 | 3 | 1 | 3 | 4 |
| 824 | 1 | 6 | 3 | 3 | 3 | 4 |
| 825 | 2 | 5 | 3 | 2 | 3 | 4 |
| 826 | 1 | 7 | 3 | 2 | 3 | 3 |
| 827 | 1 | 6 | 3 | 1 | 3 | 3 |
| 828 | 1 | 7 | 3 | 3 | 3 | 3 |
| 829 | 1 | 7 | 3 | 1 | 3 | 4 |
| 830 | 1 | 7 | 3 | 2 | 3 | 3 |
| 831 | 1 | 5 | 3 | 1 | 3 | 4 |
| 832 | 1 | 2 | 2 | 3 | 3 | 4 |
| 833 | 2 | 7 | 3 | 3 | 3 | 3 |
| 834 | 1 | 4 | 3 | 2 | 3 | 3 |
| 835 | 2 | 5 | 3 | 3 | 3 | 4 |
| 836 | 1 | 5 | 3 | 2 | 3 | 4 |
| 837 | 2 | 6 | 3 | 1 | 4 | 4 |
| 838 | 2 | 4 | 3 | 1 | 4 | 3 |
| 839 | 1 | 3 | 2 | 1 | 4 | 3 |
| 840 | 1 | 5 | 3 | 1 | 4 | 4 |
| 841 | 1 | 6 | 3 | 1 | 4 | 4 |
| 842 | 1 | 5 | 3 | 1 | 4 | 3 |
| 843 | 1 | 3 | 3 | 2 | 4 | 4 |
| 844 | 1 | 6 | 3 | 1 | 4 | 4 |
| 845 | 1 | 6 | 3 | 2 | 4 | 4 |
| 846 | 2 | 2 | 2 | 1 | 4 | 4 |
| 847 | 1 | 3 | 2 | 1 | 4 | 4 |
| 848 | 2 | 3 | 3 | 1 | 4 | 3 |
| 849 | 1 | 3 | 3 | 1 | 4 | 3 |
| 850 | 2 | 5 | 3 | 3 | 4 | 4 |
| 851 | 1 | 5 | 3 | 2 | 4 | 3 |
| 852 | 1 | 3 | 3 | 1 | 4 | 3 |
| 853 | 1 | 5 | 3 | 1 | 4 | 4 |
| 854 | 2 | 5 | 3 | 1 | 4 | 3 |
| 855 | 1 | 4 | 3 | 2 | 4 | 4 |
| 856 | 2 | 1 | 2 | 1 | 4 | 3 |
| 857 | 1 | 3 | 3 | 1 | 4 | 3 |
| 858 | 2 | 6 | 3 | 2 | 4 | 4 |
| 859 | 1 | 5 | 3 | 1 | 4 | 2 |
| 860 | 1 | 4 | 3 | 1 | 4 | 3 |
| 861 | 1 | 5 | 3 | 1 | 4 | 3 |
| 862 | 1 | 6 | 3 | 1 | 4 | 3 |
| 863 | 1 | 3 | 2 | 1 | 4 | 3 |

|     |   |   |   |   |   |   |
|-----|---|---|---|---|---|---|
| 864 | 1 | 5 | 3 | 1 | 4 | 3 |
| 865 | 2 | 4 | 3 | 1 | 4 | 3 |
| 866 | 2 | 5 | 3 | 2 | 4 | 4 |
| 867 | 1 | 2 | 2 | 1 | 4 | 3 |
| 868 | 2 | 6 | 3 | 1 | 4 | 3 |
| 869 | 1 | 3 | 3 | 1 | 4 | 3 |
| 870 | 1 | 6 | 3 | 2 | 4 | 4 |
| 871 | 1 | 5 | 3 | 2 | 4 | 3 |
| 872 | 2 | 5 | 3 | 1 | 4 | 4 |
| 873 | 1 | 6 | 3 | 1 | 4 | 3 |
| 874 | 1 | 2 | 2 | 1 | 4 | 4 |
| 875 | 1 | 5 | 3 | 1 | 4 | 3 |
| 876 | 1 | 6 | 3 | 1 | 4 | 4 |
| 877 | 1 | 1 | 2 | 1 | 4 | 4 |
| 878 | 2 | 7 | 3 | 1 | 4 | 2 |
| 879 | 2 | 6 | 3 | 2 | 4 | 4 |
| 880 | 1 | 3 | 3 | 1 | 4 | 3 |
| 881 | 1 | 4 | 3 | 1 | 4 | 3 |
| 882 | 1 | 2 | 2 | 1 | 4 | 3 |
| 883 | 2 | 6 | 3 | 1 | 4 | 4 |
| 884 | 2 | 7 | 3 | 1 | 4 | 4 |
| 885 | 2 | 5 | 3 | 2 | 4 | 4 |
| 886 | 2 | 3 | 3 | 1 | 4 | 3 |
| 887 | 2 | 4 | 3 | 1 | 4 | 4 |
| 888 | 1 | 3 | 3 | 1 | 4 | 4 |
| 889 | 1 | 3 | 3 | 2 | 4 | 4 |
| 890 | 2 | 5 | 3 | 1 | 4 | 3 |
| 891 | 2 | 5 | 3 | 1 | 4 | 3 |
| 892 | 1 | 7 | 3 | 2 | 4 | 4 |
| 893 | 1 | 5 | 3 | 2 | 4 | 4 |
| 894 | 1 | 6 | 3 | 2 | 4 | 4 |
| 895 | 2 | 3 | 3 | 3 | 3 | 4 |
| 896 | 1 | 7 | 3 | 3 | 2 | 3 |
| 897 | 1 | 5 | 3 | 3 | 3 | 3 |
| 898 | 1 | 4 | 3 | 2 | 3 | 4 |
| 899 | 2 | 7 | 3 | 2 | 3 | 3 |
| 900 | 2 | 6 | 3 | 3 | 3 | 3 |
| 901 | 1 | 6 | 3 | 1 | 3 | 4 |
| 902 | 1 | 2 | 2 | 2 | 3 | 4 |
| 903 | 1 | 6 | 3 | 3 | 3 | 3 |
| 904 | 1 | 5 | 3 | 2 | 3 | 3 |
| 905 | 2 | 5 | 3 | 3 | 3 | 3 |
| 906 | 1 | 6 | 3 | 2 | 3 | 4 |
| 907 | 2 | 5 | 3 | 2 | 3 | 3 |
| 908 | 1 | 4 | 3 | 2 | 2 | 3 |
| 909 | 1 | 6 | 3 | 2 | 3 | 4 |
| 910 | 1 | 3 | 2 | 3 | 3 | 3 |
| 911 | 1 | 4 | 3 | 2 | 3 | 3 |

|     |   |   |   |   |   |   |
|-----|---|---|---|---|---|---|
| 912 | 1 | 4 | 3 | 2 | 3 | 4 |
| 913 | 1 | 3 | 3 | 2 | 3 | 4 |
| 914 | 2 | 6 | 3 | 2 | 3 | 4 |
| 915 | 1 | 6 | 3 | 3 | 3 | 3 |
| 916 | 2 | 4 | 3 | 3 | 3 | 3 |
| 917 | 1 | 4 | 3 | 2 | 3 | 4 |
| 918 | 1 | 6 | 3 | 2 | 2 | 4 |
| 919 | 1 | 5 | 3 | 1 | 3 | 4 |
| 920 | 2 | 6 | 3 | 3 | 3 | 3 |
| 921 | 2 | 6 | 3 | 3 | 3 | 4 |
| 922 | 1 | 5 | 3 | 3 | 3 | 3 |
| 923 | 1 | 2 | 2 | 3 | 3 | 4 |
| 924 | 1 | 6 | 3 | 1 | 3 | 3 |
| 925 | 2 | 7 | 3 | 2 | 3 | 3 |
| 926 | 1 | 6 | 3 | 2 | 3 | 4 |
| 927 | 1 | 6 | 3 | 3 | 3 | 4 |
| 928 | 1 | 4 | 3 | 3 | 3 | 4 |
| 929 | 2 | 5 | 3 | 2 | 3 | 4 |
| 930 | 2 | 5 | 3 | 3 | 3 | 3 |
| 931 | 1 | 4 | 3 | 2 | 3 | 4 |
| 932 | 1 | 5 | 3 | 1 | 4 | 3 |
| 933 | 2 | 1 | 2 | 1 | 4 | 3 |
| 934 | 1 | 7 | 3 | 2 | 4 | 3 |
| 935 | 1 | 3 | 2 | 1 | 4 | 3 |
| 936 | 1 | 4 | 3 | 2 | 4 | 4 |
| 937 | 1 | 7 | 3 | 1 | 4 | 2 |
| 938 | 1 | 6 | 3 | 2 | 4 | 3 |
| 939 | 1 | 4 | 3 | 1 | 4 | 4 |
| 940 | 1 | 4 | 3 | 1 | 4 | 4 |
| 941 | 1 | 7 | 3 | 1 | 4 | 3 |
| 942 | 1 | 6 | 3 | 1 | 4 | 4 |
| 943 | 1 | 6 | 3 | 2 | 4 | 3 |
| 944 | 2 | 5 | 3 | 1 | 4 | 4 |
| 945 | 1 | 2 | 2 | 2 | 4 | 4 |
| 946 | 1 | 6 | 3 | 2 | 4 | 4 |
| 947 | 1 | 2 | 2 | 1 | 4 | 4 |
| 948 | 1 | 5 | 3 | 2 | 4 | 4 |
| 949 | 1 | 6 | 3 | 1 | 4 | 3 |
| 950 | 1 | 4 | 3 | 2 | 4 | 2 |
| 951 | 1 | 4 | 3 | 2 | 4 | 4 |
| 952 | 2 | 6 | 3 | 1 | 4 | 2 |
| 953 | 1 | 3 | 3 | 2 | 4 | 3 |
| 954 | 1 | 6 | 3 | 2 | 4 | 3 |
| 955 | 1 | 5 | 3 | 1 | 4 | 4 |
| 956 | 1 | 2 | 3 | 1 | 4 | 4 |
| 957 | 1 | 7 | 3 | 1 | 4 | 3 |
| 958 | 2 | 6 | 3 | 3 | 4 | 3 |
| 959 | 1 | 4 | 3 | 1 | 4 | 3 |

|     |   |   |   |   |   |   |
|-----|---|---|---|---|---|---|
| 960 | 1 | 4 | 3 | 1 | 4 | 2 |
| 961 | 1 | 4 | 3 | 1 | 4 | 4 |
| 962 | 1 | 5 | 3 | 1 | 4 | 3 |
| 963 | 2 | 6 | 3 | 2 | 4 | 4 |
| 964 | 1 | 5 | 3 | 1 | 4 | 3 |
| 965 | 1 | 3 | 3 | 2 | 4 | 3 |
| 966 | 1 | 4 | 3 | 1 | 4 | 4 |
| 967 | 1 | 7 | 3 | 2 | 4 | 4 |
| 968 | 2 | 5 | 3 | 2 | 4 | 4 |
| 969 | 1 | 4 | 3 | 2 | 4 | 4 |
| 970 | 1 | 6 | 3 | 2 | 4 | 4 |
| 971 | 2 | 6 | 3 | 2 | 4 | 4 |
| 972 | 1 | 6 | 3 | 2 | 4 | 3 |
| 973 | 1 | 5 | 3 | 2 | 4 | 1 |

| LOS | Number of body regions | Head | Thorax | Abdomen | Upper extremity |
|-----|------------------------|------|--------|---------|-----------------|
| 3   | 4                      | 1    | 1      | 0       | 1               |
| 3   | 2                      | 1    | 1      | 0       | 0               |
| 3   | 3                      | 0    | 1      | 0       | 1               |
| 4   | 2                      | 1    | 0      | 0       | 0               |
| 2   | 2                      | 1    | 0      | 0       | 1               |
| 5   | 3                      | 1    | 1      | 0       | 0               |
| 2   | 2                      | 1    | 0      | 0       | 1               |
| 4   | 2                      | 1    | 0      | 0       | 0               |
| 5   | 4                      | 1    | 1      | 1       | 0               |
| 4   | 4                      | 1    | 1      | 0       | 1               |
| 4   | 3                      | 1    | 1      | 0       | 1               |
| 4   | 3                      | 1    | 0      | 0       | 1               |
| 4   | 3                      | 1    | 1      | 1       | 0               |
| 4   | 3                      | 1    | 1      | 0       | 1               |
| 1   | 2                      | 1    | 1      | 0       | 0               |
| 3   | 2                      | 1    | 0      | 0       | 1               |
| 4   | 3                      | 1    | 0      | 0       | 1               |
| 4   | 2                      | 1    | 1      | 0       | 0               |
| 4   | 2                      | 1    | 1      | 0       | 0               |
| 5   | 3                      | 1    | 1      | 0       | 0               |
| 3   | 2                      | 1    | 0      | 0       | 0               |
| 4   | 2                      | 0    | 0      | 0       | 1               |
| 4   | 3                      | 1    | 1      | 0       | 0               |
| 2   | 3                      | 1    | 1      | 0       | 1               |
| 3   | 2                      | 1    | 0      | 0       | 0               |
| 5   | 3                      | 0    | 1      | 1       | 1               |
| 3   | 2                      | 1    | 1      | 0       | 0               |
| 3   | 3                      | 1    | 0      | 0       | 1               |
| 3   | 3                      | 1    | 1      | 0       | 0               |
| 4   | 2                      | 1    | 0      | 0       | 0               |
| 2   | 3                      | 1    | 1      | 1       | 0               |
| 5   | 6                      | 0    | 1      | 1       | 1               |
| 4   | 2                      | 1    | 1      | 0       | 0               |
| 5   | 4                      | 1    | 1      | 0       | 1               |
| 4   | 3                      | 1    | 0      | 0       | 1               |
| 4   | 3                      | 1    | 0      | 0       | 0               |
| 4   | 3                      | 1    | 0      | 0       | 0               |
| 1   | 2                      | 0    | 1      | 1       | 0               |
| 4   | 3                      | 1    | 0      | 0       | 1               |
| 2   | 3                      | 0    | 1      | 0       | 0               |
| 3   | 2                      | 1    | 1      | 0       | 0               |
| 5   | 3                      | 1    | 1      | 0       | 0               |
| 4   | 3                      | 1    | 1      | 0       | 1               |
| 3   | 5                      | 1    | 1      | 1       | 1               |
| 1   | 2                      | 1    | 0      | 0       | 1               |
| 4   | 3                      | 1    | 0      | 0       | 1               |
| 4   | 3                      | 1    | 0      | 0       | 1               |

|   |   |   |   |   |   |
|---|---|---|---|---|---|
| 4 | 3 | 1 | 0 | 0 | 1 |
| 4 | 3 | 1 | 1 | 0 | 0 |
| 4 | 2 | 1 | 1 | 0 | 0 |
| 3 | 3 | 1 | 1 | 0 | 0 |
| 3 | 4 | 0 | 1 | 1 | 1 |
| 4 | 5 | 1 | 1 | 0 | 0 |
| 5 | 5 | 1 | 1 | 0 | 1 |
| 5 | 5 | 1 | 1 | 0 | 1 |
| 4 | 3 | 1 | 1 | 0 | 0 |
| 2 | 3 | 1 | 1 | 0 | 1 |
| 4 | 3 | 1 | 1 | 0 | 1 |
| 3 | 3 | 1 | 1 | 0 | 1 |
| 4 | 4 | 1 | 1 | 0 | 0 |
| 5 | 4 | 1 | 1 | 1 | 0 |
| 3 | 3 | 1 | 0 | 0 | 1 |
| 5 | 3 | 1 | 1 | 0 | 0 |
| 5 | 4 | 1 | 1 | 0 | 0 |
| 3 | 5 | 1 | 1 | 0 | 1 |
| 4 | 3 | 0 | 0 | 0 | 1 |
| 2 | 3 | 1 | 1 | 1 | 0 |
| 4 | 3 | 1 | 1 | 1 | 0 |
| 4 | 3 | 1 | 0 | 0 | 1 |
| 4 | 3 | 1 | 1 | 0 | 0 |
| 4 | 2 | 1 | 0 | 0 | 0 |
| 2 | 3 | 0 | 1 | 0 | 0 |
| 3 | 3 | 1 | 1 | 0 | 0 |
| 5 | 3 | 1 | 1 | 0 | 0 |
| 3 | 4 | 1 | 1 | 0 | 1 |
| 2 | 3 | 1 | 1 | 0 | 0 |
| 4 | 3 | 1 | 1 | 1 | 0 |
| 2 | 4 | 1 | 1 | 0 | 1 |
| 2 | 3 | 0 | 1 | 1 | 0 |
| 1 | 5 | 0 | 1 | 1 | 1 |
| 5 | 3 | 1 | 1 | 0 | 0 |
| 4 | 2 | 1 | 1 | 0 | 0 |
| 4 | 3 | 1 | 0 | 0 | 0 |
| 4 | 3 | 1 | 1 | 0 | 0 |
| 4 | 3 | 1 | 1 | 0 | 1 |
| 4 | 2 | 1 | 1 | 0 | 0 |
| 4 | 4 | 1 | 1 | 0 | 1 |
| 2 | 2 | 1 | 0 | 0 | 1 |
| 4 | 3 | 1 | 1 | 0 | 1 |
| 2 | 2 | 1 | 0 | 0 | 1 |
| 4 | 3 | 1 | 0 | 0 | 0 |
| 4 | 2 | 1 | 1 | 0 | 0 |
| 4 | 4 | 1 | 1 | 0 | 1 |
| 4 | 3 | 1 | 0 | 0 | 1 |
| 4 | 3 | 1 | 1 | 0 | 1 |

|   |   |   |   |   |   |
|---|---|---|---|---|---|
| 3 | 2 | 1 | 0 | 0 | 1 |
| 5 | 3 | 1 | 1 | 1 | 0 |
| 4 | 3 | 1 | 1 | 0 | 1 |
| 4 | 4 | 1 | 1 | 0 | 0 |
| 4 | 3 | 1 | 1 | 0 | 1 |
| 5 | 3 | 0 | 1 | 1 | 1 |
| 3 | 3 | 1 | 1 | 0 | 0 |
| 4 | 3 | 1 | 1 | 0 | 1 |
| 4 | 3 | 1 | 1 | 0 | 1 |
| 5 | 3 | 1 | 0 | 0 | 1 |
| 1 | 2 | 1 | 0 | 0 | 1 |
| 5 | 3 | 1 | 0 | 0 | 1 |
| 3 | 3 | 1 | 1 | 0 | 1 |
| 3 | 2 | 1 | 0 | 0 | 1 |
| 3 | 2 | 0 | 1 | 0 | 1 |
| 5 | 4 | 1 | 1 | 1 | 1 |
| 3 | 3 | 1 | 0 | 0 | 1 |
| 4 | 4 | 1 | 1 | 1 | 0 |
| 5 | 5 | 1 | 1 | 0 | 1 |
| 4 | 4 | 1 | 1 | 0 | 1 |
| 4 | 2 | 1 | 1 | 0 | 0 |
| 3 | 2 | 1 | 1 | 0 | 0 |
| 4 | 4 | 1 | 1 | 0 | 1 |
| 4 | 3 | 1 | 1 | 0 | 1 |
| 2 | 4 | 1 | 1 | 0 | 1 |
| 5 | 2 | 0 | 0 | 0 | 1 |
| 3 | 2 | 1 | 0 | 0 | 1 |
| 5 | 2 | 0 | 1 | 0 | 0 |
| 5 | 3 | 0 | 0 | 0 | 0 |
| 1 | 2 | 1 | 0 | 0 | 1 |
| 4 | 2 | 0 | 0 | 0 | 1 |
| 5 | 2 | 1 | 0 | 0 | 0 |
| 4 | 2 | 1 | 0 | 0 | 1 |
| 4 | 2 | 0 | 0 | 0 | 1 |
| 5 | 2 | 1 | 0 | 0 | 1 |
| 4 | 2 | 1 | 0 | 0 | 0 |
| 4 | 2 | 0 | 1 | 0 | 0 |
| 4 | 2 | 0 | 0 | 0 | 0 |
| 4 | 2 | 0 | 0 | 0 | 0 |
| 4 | 2 | 0 | 0 | 0 | 1 |
| 4 | 2 | 0 | 0 | 0 | 1 |
| 2 | 4 | 1 | 1 | 1 | 0 |
| 4 | 2 | 1 | 0 | 0 | 0 |
| 3 | 3 | 1 | 1 | 0 | 1 |
| 4 | 2 | 0 | 1 | 0 | 0 |
| 4 | 2 | 1 | 0 | 0 | 1 |
| 4 | 2 | 1 | 0 | 0 | 0 |
| 4 | 2 | 0 | 0 | 0 | 1 |
| 2 | 2 | 1 | 0 | 0 | 0 |



|   |   |   |   |   |   |
|---|---|---|---|---|---|
| 4 | 2 | 1 | 1 | 0 | 0 |
| 2 | 2 | 1 | 1 | 0 | 0 |
| 4 | 2 | 1 | 1 | 0 | 0 |
| 3 | 2 | 1 | 0 | 0 | 1 |
| 5 | 2 | 1 | 0 | 0 | 1 |
| 1 | 2 | 1 | 0 | 0 | 1 |
| 3 | 2 | 1 | 0 | 0 | 0 |
| 1 | 2 | 1 | 1 | 0 | 0 |
| 2 | 2 | 1 | 1 | 0 | 0 |
| 4 | 2 | 1 | 0 | 0 | 0 |
| 3 | 2 | 1 | 0 | 0 | 0 |
| 4 | 2 | 1 | 0 | 0 | 0 |
| 2 | 2 | 0 | 1 | 1 | 0 |
| 3 | 2 | 1 | 0 | 0 | 1 |
| 3 | 2 | 1 | 0 | 1 | 0 |
| 3 | 2 | 1 | 1 | 0 | 0 |
| 5 | 2 | 0 | 0 | 0 | 1 |
| 3 | 2 | 1 | 0 | 0 | 0 |
| 3 | 2 | 1 | 0 | 0 | 0 |
| 3 | 2 | 1 | 0 | 0 | 0 |
| 2 | 2 | 0 | 1 | 1 | 0 |
| 2 | 2 | 0 | 0 | 0 | 1 |
| 4 | 2 | 0 | 0 | 0 | 0 |
| 4 | 2 | 1 | 0 | 0 | 1 |
| 3 | 3 | 1 | 0 | 0 | 1 |
| 2 | 2 | 1 | 0 | 0 | 0 |
| 4 | 2 | 1 | 1 | 0 | 0 |
| 4 | 3 | 1 | 1 | 0 | 1 |
| 3 | 2 | 1 | 0 | 0 | 1 |
| 4 | 2 | 1 | 1 | 0 | 0 |
| 4 | 2 | 1 | 1 | 0 | 0 |
| 3 | 2 | 0 | 1 | 0 | 1 |
| 5 | 4 | 0 | 1 | 1 | 0 |
| 1 | 2 | 0 | 0 | 0 | 1 |
| 4 | 2 | 0 | 0 | 0 | 1 |
| 3 | 2 | 0 | 1 | 0 | 0 |
| 3 | 2 | 0 | 1 | 0 | 0 |
| 3 | 2 | 1 | 0 | 0 | 1 |
| 2 | 2 | 1 | 1 | 0 | 0 |
| 4 | 2 | 0 | 0 | 0 | 1 |
| 2 | 2 | 0 | 0 | 0 | 1 |
| 3 | 2 | 0 | 0 | 0 | 1 |
| 4 | 2 | 0 | 0 | 0 | 1 |
| 4 | 2 | 0 | 1 | 0 | 1 |
| 5 | 3 | 1 | 1 | 1 | 0 |
| 4 | 2 | 0 | 0 | 0 | 0 |
| 3 | 2 | 0 | 0 | 0 | 1 |
| 3 | 2 | 1 | 1 | 0 | 0 |

|   |   |   |   |   |   |
|---|---|---|---|---|---|
| 4 | 2 | 0 | 1 | 0 | 0 |
| 3 | 2 | 1 | 0 | 0 | 1 |
| 4 | 2 | 0 | 1 | 0 | 0 |
| 4 | 2 | 0 | 1 | 0 | 1 |
| 4 | 2 | 0 | 1 | 0 | 1 |
| 4 | 2 | 0 | 1 | 0 | 1 |
| 4 | 2 | 1 | 0 | 0 | 0 |
| 4 | 2 | 0 | 0 | 0 | 1 |
| 3 | 2 | 0 | 1 | 0 | 1 |
| 3 | 2 | 0 | 1 | 0 | 1 |
| 3 | 2 | 0 | 1 | 0 | 1 |
| 4 | 2 | 1 | 1 | 0 | 0 |
| 4 | 2 | 1 | 1 | 0 | 0 |
| 4 | 2 | 0 | 1 | 0 | 1 |
| 4 | 2 | 1 | 0 | 0 | 0 |
| 4 | 2 | 1 | 0 | 0 | 0 |
| 3 | 2 | 0 | 0 | 1 | 0 |
| 4 | 2 | 0 | 0 | 0 | 1 |
| 5 | 2 | 0 | 1 | 0 | 1 |
| 3 | 2 | 1 | 0 | 0 | 0 |
| 2 | 2 | 1 | 1 | 0 | 0 |
| 3 | 2 | 1 | 0 | 0 | 0 |
| 3 | 2 | 1 | 1 | 0 | 0 |
| 4 | 2 | 1 | 0 | 0 | 0 |
| 4 | 2 | 1 | 1 | 0 | 0 |
| 3 | 2 | 1 | 0 | 0 | 0 |
| 2 | 2 | 1 | 0 | 0 | 0 |
| 1 | 2 | 1 | 1 | 0 | 0 |
| 3 | 3 | 1 | 0 | 0 | 1 |
| 4 | 3 | 0 | 1 | 0 | 0 |
| 3 | 2 | 0 | 1 | 0 | 1 |
| 2 | 2 | 1 | 0 | 0 | 1 |
| 3 | 2 | 0 | 1 | 0 | 1 |
| 2 | 2 | 0 | 1 | 0 | 1 |
| 2 | 2 | 0 | 0 | 0 | 1 |
| 4 | 2 | 1 | 0 | 0 | 0 |
| 1 | 3 | 1 | 0 | 0 | 1 |
| 3 | 3 | 0 | 1 | 1 | 0 |
| 4 | 2 | 1 | 0 | 0 | 1 |
| 4 | 2 | 0 | 1 | 1 | 0 |
| 5 | 2 | 1 | 1 | 0 | 0 |
| 5 | 2 | 0 | 1 | 1 | 0 |
| 3 | 2 | 1 | 1 | 0 | 0 |
| 4 | 2 | 1 | 0 | 0 | 1 |
| 4 | 2 | 1 | 1 | 0 | 0 |
| 3 | 2 | 1 | 0 | 0 | 1 |
| 2 | 2 | 1 | 0 | 0 | 1 |
| 4 | 2 | 0 | 1 | 0 | 1 |

|   |   |   |   |   |   |
|---|---|---|---|---|---|
| 4 | 2 | 1 | 1 | 0 | 0 |
| 5 | 2 | 1 | 1 | 0 | 0 |
| 4 | 2 | 1 | 1 | 0 | 0 |
| 4 | 3 | 1 | 0 | 0 | 0 |
| 4 | 2 | 1 | 1 | 0 | 0 |
| 3 | 2 | 1 | 1 | 0 | 0 |
| 3 | 3 | 1 | 1 | 0 | 1 |
| 4 | 2 | 0 | 1 | 0 | 1 |
| 1 | 2 | 1 | 0 | 0 | 0 |
| 3 | 2 | 0 | 1 | 0 | 1 |
| 4 | 2 | 1 | 1 | 0 | 0 |
| 4 | 2 | 1 | 1 | 0 | 0 |
| 3 | 2 | 1 | 1 | 0 | 0 |
| 4 | 2 | 1 | 0 | 0 | 0 |
| 4 | 2 | 0 | 0 | 1 | 1 |
| 3 | 2 | 0 | 1 | 0 | 0 |
| 3 | 2 | 0 | 1 | 0 | 1 |
| 3 | 2 | 0 | 1 | 0 | 1 |
| 3 | 3 | 1 | 1 | 0 | 0 |
| 4 | 2 | 0 | 1 | 0 | 1 |
| 4 | 2 | 1 | 0 | 0 | 0 |
| 5 | 2 | 1 | 1 | 0 | 0 |
| 3 | 2 | 0 | 1 | 0 | 1 |
| 1 | 2 | 0 | 0 | 0 | 1 |
| 4 | 2 | 1 | 0 | 0 | 0 |
| 5 | 2 | 1 | 1 | 0 | 0 |
| 3 | 2 | 0 | 1 | 0 | 1 |
| 1 | 3 | 1 | 1 | 1 | 0 |
| 4 | 4 | 1 | 1 | 1 | 0 |
| 2 | 2 | 1 | 0 | 0 | 0 |
| 4 | 3 | 0 | 1 | 1 | 0 |
| 4 | 2 | 0 | 0 | 0 | 0 |
| 4 | 4 | 0 | 0 | 1 | 1 |
| 3 | 2 | 0 | 0 | 0 | 0 |
| 3 | 2 | 1 | 0 | 0 | 1 |
| 3 | 2 | 0 | 0 | 0 | 0 |
| 1 | 2 | 1 | 0 | 0 | 0 |
| 3 | 2 | 1 | 1 | 0 | 0 |
| 4 | 2 | 0 | 1 | 0 | 0 |
| 4 | 2 | 0 | 0 | 0 | 1 |
| 3 | 4 | 1 | 0 | 0 | 1 |
| 3 | 4 | 0 | 1 | 1 | 0 |
| 1 | 3 | 1 | 0 | 0 | 1 |
| 5 | 2 | 0 | 1 | 0 | 0 |
| 4 | 4 | 1 | 1 | 0 | 1 |
| 5 | 3 | 0 | 1 | 0 | 1 |
| 3 | 3 | 1 | 1 | 0 | 0 |
| 3 | 3 | 1 | 1 | 0 | 1 |

|   |   |   |   |   |   |
|---|---|---|---|---|---|
| 4 | 3 | 0 | 1 | 0 | 1 |
| 5 | 5 | 1 | 1 | 0 | 1 |
| 2 | 2 | 1 | 0 | 0 | 1 |
| 3 | 2 | 1 | 0 | 0 | 1 |
| 4 | 2 | 1 | 1 | 0 | 0 |
| 4 | 3 | 1 | 1 | 0 | 0 |
| 3 | 2 | 1 | 0 | 0 | 1 |
| 2 | 3 | 1 | 1 | 0 | 1 |
| 2 | 3 | 1 | 1 | 0 | 0 |
| 4 | 5 | 0 | 0 | 1 | 1 |
| 5 | 3 | 1 | 1 | 0 | 0 |
| 2 | 3 | 1 | 1 | 0 | 0 |
| 3 | 3 | 0 | 1 | 0 | 1 |
| 5 | 3 | 1 | 0 | 0 | 1 |
| 4 | 2 | 1 | 1 | 0 | 0 |
| 4 | 3 | 1 | 0 | 0 | 1 |
| 5 | 3 | 0 | 1 | 0 | 0 |
| 4 | 4 | 1 | 1 | 0 | 1 |
| 5 | 3 | 0 | 1 | 1 | 1 |
| 3 | 3 | 1 | 1 | 0 | 0 |
| 3 | 3 | 1 | 0 | 0 | 0 |
| 5 | 4 | 1 | 1 | 0 | 0 |
| 3 | 2 | 1 | 1 | 0 | 0 |
| 4 | 3 | 1 | 0 | 0 | 0 |
| 5 | 2 | 1 | 0 | 0 | 0 |
| 5 | 2 | 1 | 0 | 1 | 0 |
| 2 | 2 | 1 | 1 | 0 | 0 |
| 3 | 2 | 0 | 1 | 1 | 0 |
| 3 | 3 | 1 | 1 | 1 | 0 |
| 2 | 2 | 1 | 0 | 0 | 0 |
| 5 | 2 | 1 | 1 | 0 | 0 |
| 3 | 2 | 1 | 0 | 0 | 1 |
| 3 | 3 | 0 | 1 | 1 | 0 |
| 4 | 2 | 0 | 0 | 0 | 0 |
| 4 | 2 | 1 | 1 | 0 | 0 |
| 4 | 3 | 1 | 0 | 0 | 0 |
| 4 | 2 | 1 | 1 | 0 | 0 |
| 1 | 3 | 1 | 1 | 0 | 0 |
| 2 | 2 | 1 | 0 | 0 | 0 |
| 4 | 2 | 1 | 1 | 0 | 0 |
| 5 | 2 | 1 | 1 | 0 | 0 |
| 5 | 2 | 1 | 0 | 0 | 0 |
| 2 | 2 | 0 | 1 | 0 | 1 |
| 4 | 2 | 1 | 0 | 0 | 1 |
| 5 | 2 | 1 | 0 | 0 | 1 |
| 2 | 2 | 1 | 1 | 0 | 0 |
| 4 | 2 | 1 | 1 | 0 | 0 |
| 3 | 3 | 1 | 0 | 0 | 0 |

|   |   |   |   |   |   |
|---|---|---|---|---|---|
| 4 | 5 | 1 | 1 | 1 | 0 |
| 1 | 3 | 1 | 1 | 0 | 0 |
| 3 | 2 | 1 | 0 | 0 | 0 |
| 4 | 3 | 0 | 1 | 1 | 0 |
| 4 | 4 | 1 | 1 | 0 | 1 |
| 5 | 3 | 0 | 1 | 1 | 1 |
| 3 | 3 | 1 | 1 | 0 | 0 |
| 1 | 2 | 1 | 1 | 0 | 0 |
| 3 | 4 | 1 | 1 | 0 | 1 |
| 4 | 3 | 1 | 0 | 0 | 0 |
| 4 | 4 | 1 | 1 | 0 | 1 |
| 5 | 3 | 1 | 1 | 0 | 0 |
| 3 | 2 | 1 | 0 | 0 | 0 |
| 3 | 2 | 1 | 0 | 0 | 1 |
| 3 | 3 | 1 | 0 | 0 | 1 |
| 2 | 2 | 1 | 1 | 0 | 0 |
| 1 | 3 | 1 | 0 | 0 | 1 |
| 3 | 3 | 1 | 0 | 0 | 1 |
| 2 | 2 | 1 | 0 | 0 | 0 |
| 4 | 2 | 1 | 1 | 0 | 0 |
| 2 | 3 | 1 | 1 | 1 | 0 |
| 2 | 3 | 1 | 1 | 1 | 0 |
| 4 | 2 | 1 | 0 | 0 | 1 |
| 3 | 2 | 1 | 0 | 0 | 0 |
| 2 | 2 | 1 | 0 | 0 | 1 |
| 3 | 2 | 1 | 0 | 0 | 0 |
| 2 | 3 | 1 | 0 | 0 | 0 |
| 3 | 2 | 1 | 0 | 1 | 0 |
| 4 | 2 | 1 | 1 | 0 | 0 |
| 4 | 2 | 0 | 1 | 0 | 0 |
| 3 | 2 | 0 | 0 | 0 | 1 |
| 3 | 2 | 1 | 0 | 0 | 1 |
| 3 | 2 | 0 | 0 | 0 | 1 |
| 3 | 2 | 0 | 0 | 0 | 1 |
| 2 | 2 | 1 | 0 | 0 | 1 |
| 4 | 2 | 0 | 0 | 0 | 1 |
| 1 | 2 | 1 | 1 | 0 | 0 |
| 3 | 2 | 1 | 0 | 0 | 0 |
| 4 | 2 | 1 | 1 | 0 | 0 |
| 1 | 2 | 0 | 0 | 0 | 1 |
| 4 | 2 | 1 | 0 | 0 | 0 |
| 2 | 2 | 1 | 0 | 0 | 0 |
| 3 | 2 | 0 | 0 | 0 | 1 |
| 3 | 2 | 1 | 0 | 0 | 0 |
| 2 | 2 | 1 | 0 | 0 | 0 |
| 3 | 2 | 1 | 0 | 0 | 0 |
| 4 | 2 | 0 | 0 | 0 | 0 |
| 2 | 2 | 0 | 0 | 0 | 1 |

|   |   |   |   |   |   |
|---|---|---|---|---|---|
| 4 | 2 | 1 | 0 | 0 | 1 |
| 3 | 4 | 1 | 1 | 1 | 0 |
| 3 | 3 | 1 | 0 | 0 | 1 |
| 4 | 3 | 1 | 1 | 0 | 0 |
| 5 | 3 | 1 | 1 | 0 | 1 |
| 4 | 5 | 1 | 1 | 1 | 1 |
| 4 | 4 | 1 | 0 | 0 | 0 |
| 5 | 6 | 0 | 1 | 1 | 1 |
| 3 | 3 | 1 | 0 | 0 | 1 |
| 4 | 5 | 1 | 1 | 0 | 0 |
| 1 | 3 | 0 | 1 | 1 | 0 |
| 2 | 3 | 1 | 1 | 0 | 0 |
| 4 | 4 | 1 | 1 | 1 | 0 |
| 4 | 4 | 1 | 1 | 1 | 0 |
| 4 | 5 | 1 | 1 | 1 | 0 |
| 4 | 4 | 1 | 1 | 0 | 0 |
| 5 | 6 | 1 | 1 | 1 | 1 |
| 3 | 4 | 0 | 1 | 1 | 1 |
| 2 | 3 | 1 | 0 | 0 | 0 |
| 3 | 3 | 0 | 1 | 0 | 1 |
| 3 | 3 | 0 | 0 | 1 | 1 |
| 4 | 3 | 1 | 1 | 1 | 0 |
| 4 | 4 | 1 | 1 | 0 | 1 |
| 4 | 2 | 1 | 0 | 0 | 1 |
| 4 | 3 | 0 | 1 | 1 | 0 |
| 3 | 3 | 0 | 1 | 0 | 1 |
| 5 | 3 | 0 | 1 | 0 | 1 |
| 2 | 2 | 1 | 1 | 0 | 0 |
| 1 | 2 | 1 | 0 | 0 | 0 |
| 3 | 3 | 0 | 1 | 0 | 0 |
| 3 | 2 | 0 | 0 | 0 | 1 |
| 2 | 2 | 0 | 1 | 0 | 0 |
| 3 | 2 | 1 | 0 | 0 | 1 |
| 2 | 2 | 0 | 0 | 0 | 0 |
| 4 | 2 | 0 | 1 | 0 | 0 |
| 4 | 2 | 1 | 1 | 0 | 0 |
| 2 | 2 | 0 | 0 | 0 | 1 |
| 1 | 2 | 1 | 1 | 0 | 0 |
| 1 | 2 | 0 | 1 | 0 | 1 |
| 4 | 2 | 0 | 1 | 0 | 1 |
| 3 | 2 | 1 | 0 | 0 | 0 |
| 2 | 2 | 1 | 0 | 0 | 0 |
| 2 | 2 | 0 | 0 | 0 | 1 |
| 3 | 2 | 1 | 1 | 0 | 0 |
| 3 | 3 | 1 | 0 | 0 | 0 |
| 3 | 2 | 0 | 0 | 0 | 1 |
| 3 | 2 | 1 | 1 | 0 | 0 |
| 2 | 2 | 1 | 0 | 0 | 0 |

|   |   |   |   |   |   |
|---|---|---|---|---|---|
| 2 | 3 | 1 | 0 | 0 | 1 |
| 3 | 2 | 0 | 1 | 0 | 1 |
| 3 | 2 | 1 | 0 | 0 | 0 |
| 5 | 2 | 1 | 1 | 0 | 0 |
| 2 | 2 | 0 | 0 | 0 | 0 |
| 3 | 2 | 1 | 0 | 0 | 0 |
| 3 | 2 | 0 | 0 | 0 | 0 |
| 2 | 2 | 1 | 0 | 0 | 1 |
| 4 | 2 | 0 | 1 | 0 | 1 |
| 1 | 3 | 1 | 0 | 1 | 0 |
| 3 | 2 | 1 | 0 | 1 | 0 |
| 2 | 2 | 0 | 0 | 0 | 0 |
| 4 | 2 | 0 | 0 | 1 | 0 |
| 5 | 2 | 1 | 0 | 0 | 0 |
| 2 | 2 | 0 | 0 | 1 | 0 |
| 1 | 2 | 1 | 0 | 0 | 1 |
| 3 | 2 | 0 | 0 | 0 | 0 |
| 3 | 5 | 1 | 1 | 1 | 1 |
| 3 | 3 | 1 | 1 | 1 | 0 |
| 4 | 3 | 1 | 1 | 0 | 0 |
| 1 | 5 | 1 | 1 | 1 | 1 |
| 5 | 4 | 1 | 1 | 0 | 1 |
| 3 | 5 | 1 | 1 | 0 | 1 |
| 2 | 2 | 1 | 0 | 0 | 0 |
| 3 | 3 | 1 | 1 | 0 | 0 |
| 2 | 4 | 1 | 1 | 1 | 0 |
| 3 | 3 | 1 | 0 | 0 | 1 |
| 3 | 4 | 0 | 1 | 1 | 1 |
| 2 | 3 | 1 | 1 | 0 | 1 |
| 3 | 4 | 1 | 1 | 0 | 1 |
| 4 | 3 | 0 | 1 | 1 | 1 |
| 2 | 2 | 1 | 1 | 0 | 0 |
| 3 | 3 | 1 | 0 | 0 | 1 |
| 3 | 2 | 1 | 0 | 0 | 0 |
| 3 | 3 | 1 | 0 | 1 | 1 |
| 3 | 3 | 1 | 0 | 0 | 1 |
| 3 | 3 | 1 | 1 | 0 | 1 |
| 3 | 3 | 1 | 1 | 0 | 1 |
| 4 | 4 | 1 | 0 | 0 | 1 |
| 3 | 3 | 1 | 0 | 0 | 0 |
| 3 | 3 | 1 | 0 | 0 | 1 |
| 3 | 2 | 1 | 0 | 0 | 1 |
| 4 | 2 | 1 | 0 | 0 | 0 |
| 3 | 2 | 0 | 0 | 0 | 0 |
| 3 | 2 | 1 | 1 | 0 | 0 |
| 3 | 2 | 1 | 0 | 0 | 0 |
| 3 | 2 | 1 | 0 | 0 | 1 |
| 2 | 2 | 1 | 1 | 0 | 0 |

|   |   |   |   |   |   |
|---|---|---|---|---|---|
| 2 | 2 | 0 | 0 | 0 | 1 |
| 3 | 2 | 0 | 0 | 0 | 1 |
| 3 | 2 | 1 | 0 | 0 | 0 |
| 1 | 2 | 0 | 1 | 0 | 0 |
| 3 | 2 | 1 | 0 | 0 | 1 |
| 4 | 2 | 0 | 0 | 0 | 1 |
| 2 | 2 | 1 | 0 | 0 | 1 |
| 4 | 4 | 1 | 1 | 0 | 0 |
| 3 | 2 | 0 | 0 | 0 | 0 |
| 4 | 2 | 1 | 0 | 0 | 0 |
| 1 | 3 | 0 | 0 | 0 | 1 |
| 3 | 2 | 0 | 1 | 0 | 1 |
| 3 | 2 | 0 | 1 | 0 | 0 |
| 2 | 2 | 1 | 0 | 0 | 0 |
| 3 | 2 | 1 | 1 | 0 | 0 |
| 2 | 2 | 0 | 1 | 0 | 1 |
| 4 | 2 | 1 | 0 | 0 | 0 |
| 3 | 2 | 1 | 1 | 0 | 0 |
| 3 | 2 | 1 | 0 | 0 | 0 |
| 3 | 2 | 1 | 0 | 0 | 0 |
| 3 | 3 | 0 | 0 | 0 | 1 |
| 2 | 2 | 1 | 0 | 0 | 0 |
| 3 | 2 | 1 | 0 | 0 | 0 |
| 4 | 3 | 1 | 1 | 0 | 0 |
| 2 | 2 | 1 | 1 | 0 | 0 |
| 5 | 3 | 0 | 0 | 1 | 0 |
| 3 | 2 | 0 | 0 | 1 | 0 |
| 4 | 4 | 1 | 0 | 1 | 0 |
| 2 | 4 | 1 | 1 | 1 | 0 |
| 3 | 4 | 1 | 1 | 0 | 0 |
| 5 | 3 | 1 | 1 | 1 | 0 |
| 3 | 3 | 0 | 1 | 1 | 0 |
| 4 | 4 | 0 | 1 | 1 | 0 |
| 4 | 5 | 1 | 0 | 1 | 0 |
| 4 | 5 | 1 | 1 | 1 | 1 |
| 4 | 6 | 1 | 1 | 1 | 1 |
| 4 | 3 | 0 | 1 | 1 | 0 |
| 4 | 5 | 1 | 1 | 1 | 0 |
| 3 | 2 | 1 | 1 | 0 | 0 |
| 3 | 2 | 1 | 1 | 0 | 0 |
| 4 | 5 | 1 | 1 | 1 | 1 |
| 2 | 5 | 1 | 1 | 1 | 1 |
| 4 | 3 | 0 | 0 | 0 | 0 |
| 4 | 5 | 1 | 1 | 0 | 1 |
| 4 | 4 | 1 | 1 | 0 | 1 |
| 4 | 4 | 1 | 1 | 0 | 1 |
| 4 | 2 | 1 | 1 | 0 | 0 |
| 3 | 5 | 1 | 1 | 0 | 1 |



|   |   |   |   |   |   |
|---|---|---|---|---|---|
| 4 | 3 | 1 | 1 | 1 | 0 |
| 4 | 5 | 1 | 1 | 1 | 1 |
| 4 | 3 | 0 | 1 | 1 | 0 |
| 4 | 2 | 1 | 1 | 0 | 0 |
| 3 | 3 | 1 | 0 | 0 | 1 |
| 3 | 3 | 0 | 1 | 0 | 1 |
| 4 | 3 | 1 | 1 | 0 | 0 |
| 4 | 3 | 0 | 1 | 0 | 0 |
| 2 | 3 | 1 | 1 | 0 | 0 |
| 4 | 4 | 1 | 1 | 0 | 0 |
| 4 | 3 | 1 | 1 | 0 | 1 |
| 4 | 3 | 0 | 0 | 1 | 0 |
| 3 | 3 | 1 | 1 | 0 | 0 |
| 4 | 3 | 1 | 1 | 0 | 1 |
| 3 | 3 | 1 | 0 | 0 | 0 |
| 4 | 3 | 1 | 0 | 0 | 1 |
| 3 | 4 | 1 | 1 | 0 | 1 |
| 4 | 2 | 1 | 0 | 0 | 0 |
| 2 | 3 | 1 | 0 | 0 | 0 |
| 2 | 3 | 1 | 1 | 0 | 1 |
| 3 | 2 | 0 | 0 | 0 | 0 |
| 4 | 2 | 1 | 0 | 0 | 0 |
| 3 | 3 | 1 | 0 | 1 | 0 |
| 2 | 4 | 1 | 1 | 1 | 0 |
| 4 | 2 | 1 | 0 | 0 | 0 |
| 2 | 3 | 1 | 0 | 0 | 0 |
| 4 | 3 | 1 | 1 | 0 | 0 |
| 3 | 3 | 1 | 0 | 0 | 1 |
| 4 | 2 | 1 | 1 | 0 | 0 |
| 4 | 3 | 0 | 1 | 0 | 1 |
| 3 | 2 | 1 | 0 | 0 | 0 |
| 3 | 2 | 1 | 0 | 0 | 0 |
| 2 | 2 | 1 | 0 | 0 | 0 |
| 5 | 2 | 0 | 1 | 1 | 0 |
| 3 | 2 | 0 | 1 | 0 | 0 |
| 4 | 2 | 0 | 1 | 1 | 0 |
| 3 | 2 | 1 | 0 | 0 | 0 |
| 4 | 2 | 1 | 1 | 0 | 0 |
| 4 | 2 | 1 | 1 | 0 | 0 |
| 4 | 2 | 0 | 1 | 0 | 0 |
| 2 | 2 | 1 | 0 | 0 | 1 |
| 3 | 2 | 0 | 1 | 0 | 0 |
| 2 | 2 | 0 | 1 | 0 | 0 |
| 3 | 2 | 0 | 1 | 0 | 1 |
| 2 | 2 | 0 | 0 | 0 | 0 |
| 2 | 3 | 1 | 0 | 0 | 1 |
| 3 | 2 | 0 | 0 | 0 | 1 |
| 2 | 2 | 0 | 0 | 0 | 0 |

|   |   |   |   |   |   |
|---|---|---|---|---|---|
| 2 | 2 | 0 | 1 | 0 | 1 |
| 4 | 2 | 1 | 0 | 0 | 0 |
| 2 | 2 | 0 | 1 | 0 | 0 |
| 4 | 2 | 1 | 1 | 0 | 0 |
| 5 | 3 | 0 | 0 | 1 | 0 |
| 5 | 2 | 1 | 0 | 1 | 0 |
| 3 | 2 | 0 | 1 | 0 | 1 |
| 3 | 2 | 0 | 0 | 1 | 1 |
| 3 | 2 | 0 | 1 | 1 | 0 |
| 4 | 2 | 0 | 1 | 0 | 0 |
| 3 | 2 | 0 | 1 | 0 | 1 |
| 3 | 2 | 1 | 0 | 0 | 0 |
| 3 | 2 | 0 | 1 | 0 | 1 |
| 2 | 2 | 0 | 1 | 0 | 0 |
| 2 | 3 | 1 | 1 | 0 | 0 |
| 2 | 2 | 0 | 0 | 0 | 0 |
| 1 | 3 | 1 | 0 | 1 | 0 |
| 2 | 2 | 0 | 0 | 0 | 1 |
| 1 | 2 | 0 | 0 | 0 | 1 |
| 3 | 2 | 1 | 0 | 0 | 1 |
| 3 | 2 | 0 | 0 | 0 | 1 |
| 4 | 3 | 1 | 1 | 1 | 0 |
| 3 | 2 | 0 | 1 | 0 | 0 |
| 4 | 2 | 1 | 0 | 0 | 0 |
| 3 | 3 | 1 | 0 | 0 | 1 |
| 2 | 3 | 1 | 1 | 0 | 0 |
| 2 | 3 | 1 | 0 | 0 | 1 |
| 3 | 2 | 1 | 0 | 0 | 0 |
| 2 | 2 | 0 | 0 | 0 | 1 |
| 3 | 2 | 1 | 0 | 0 | 0 |
| 1 | 3 | 0 | 1 | 0 | 1 |
| 2 | 2 | 1 | 0 | 0 | 0 |
| 3 | 3 | 0 | 1 | 0 | 1 |
| 2 | 3 | 1 | 0 | 0 | 1 |
| 3 | 2 | 1 | 0 | 0 | 1 |
| 2 | 2 | 1 | 0 | 0 | 0 |
| 2 | 2 | 0 | 0 | 0 | 1 |
| 3 | 2 | 1 | 0 | 0 | 1 |
| 2 | 2 | 1 | 0 | 0 | 1 |
| 3 | 2 | 1 | 0 | 0 | 0 |
| 2 | 2 | 0 | 1 | 0 | 0 |
| 3 | 4 | 0 | 1 | 1 | 0 |
| 3 | 3 | 0 | 1 | 1 | 1 |
| 2 | 5 | 1 | 0 | 0 | 1 |
| 3 | 2 | 1 | 0 | 0 | 0 |
| 3 | 2 | 1 | 0 | 0 | 1 |
| 2 | 4 | 1 | 1 | 0 | 1 |
| 3 | 2 | 0 | 1 | 0 | 0 |

|   |   |   |   |   |   |
|---|---|---|---|---|---|
| 3 | 2 | 1 | 1 | 0 | 0 |
| 4 | 6 | 1 | 1 | 1 | 1 |
| 4 | 3 | 1 | 0 | 0 | 1 |
| 5 | 2 | 1 | 0 | 0 | 0 |
| 3 | 2 | 1 | 0 | 0 | 0 |
| 4 | 3 | 1 | 1 | 0 | 0 |
| 2 | 2 | 0 | 1 | 0 | 1 |
| 4 | 2 | 0 | 1 | 0 | 0 |
| 2 | 2 | 0 | 0 | 0 | 1 |
| 1 | 2 | 0 | 0 | 0 | 1 |
| 3 | 2 | 0 | 1 | 0 | 1 |
| 2 | 2 | 1 | 0 | 0 | 0 |
| 5 | 2 | 1 | 1 | 0 | 0 |
| 5 | 2 | 1 | 0 | 0 | 0 |
| 4 | 6 | 1 | 1 | 1 | 1 |
| 5 | 3 | 1 | 0 | 0 | 0 |
| 4 | 4 | 1 | 1 | 0 | 1 |
| 5 | 3 | 0 | 1 | 0 | 0 |
| 5 | 5 | 1 | 1 | 1 | 0 |
| 3 | 3 | 1 | 1 | 1 | 0 |
| 2 | 3 | 1 | 1 | 0 | 1 |
| 4 | 4 | 0 | 1 | 0 | 1 |
| 4 | 2 | 1 | 1 | 0 | 0 |
| 5 | 4 | 1 | 0 | 0 | 1 |
| 5 | 5 | 1 | 1 | 0 | 0 |
| 5 | 3 | 1 | 0 | 0 | 1 |
| 4 | 6 | 1 | 1 | 0 | 1 |
| 5 | 3 | 1 | 0 | 0 | 1 |
| 4 | 3 | 1 | 0 | 0 | 1 |
| 5 | 5 | 1 | 0 | 1 | 1 |
| 5 | 2 | 0 | 0 | 0 | 1 |
| 4 | 4 | 1 | 1 | 0 | 0 |
| 5 | 3 | 1 | 1 | 0 | 1 |
| 4 | 3 | 1 | 1 | 1 | 0 |
| 5 | 3 | 0 | 0 | 0 | 1 |
| 5 | 3 | 1 | 0 | 0 | 0 |
| 5 | 2 | 1 | 0 | 0 | 0 |
| 4 | 5 | 0 | 1 | 1 | 1 |
| 5 | 3 | 1 | 1 | 0 | 0 |
| 5 | 3 | 0 | 1 | 0 | 0 |
| 4 | 5 | 0 | 1 | 1 | 0 |
| 5 | 6 | 1 | 1 | 1 | 1 |
| 5 | 3 | 0 | 1 | 1 | 0 |
| 5 | 2 | 1 | 0 | 0 | 1 |
| 4 | 4 | 1 | 1 | 0 | 1 |
| 5 | 5 | 0 | 1 | 1 | 0 |
| 5 | 3 | 1 | 1 | 0 | 1 |
| 5 | 4 | 0 | 1 | 1 | 0 |

|   |   |   |   |   |   |
|---|---|---|---|---|---|
| 5 | 2 | 0 | 1 | 0 | 1 |
| 3 | 4 | 1 | 1 | 0 | 0 |
| 2 | 2 | 1 | 1 | 0 | 0 |
| 5 | 5 | 0 | 1 | 1 | 0 |
| 5 | 3 | 1 | 1 | 0 | 0 |
| 5 | 3 | 1 | 1 | 0 | 0 |
| 5 | 3 | 1 | 1 | 0 | 0 |
| 5 | 3 | 0 | 0 | 1 | 0 |
| 5 | 4 | 0 | 0 | 0 | 1 |
| 4 | 3 | 1 | 1 | 0 | 1 |
| 4 | 4 | 1 | 1 | 1 | 0 |
| 5 | 4 | 1 | 1 | 0 | 0 |
| 5 | 3 | 1 | 1 | 1 | 0 |
| 4 | 2 | 0 | 1 | 0 | 0 |
| 5 | 3 | 1 | 1 | 0 | 0 |
| 5 | 3 | 1 | 0 | 0 | 0 |
| 5 | 4 | 0 | 1 | 0 | 0 |
| 5 | 2 | 0 | 1 | 0 | 0 |
| 3 | 3 | 1 | 1 | 0 | 0 |
| 5 | 3 | 1 | 1 | 0 | 1 |
| 5 | 5 | 1 | 1 | 1 | 1 |
| 5 | 4 | 1 | 1 | 1 | 0 |
| 5 | 3 | 1 | 1 | 0 | 1 |
| 5 | 4 | 1 | 1 | 0 | 1 |
| 5 | 4 | 0 | 1 | 0 | 1 |
| 5 | 4 | 0 | 1 | 1 | 1 |
| 5 | 3 | 1 | 1 | 0 | 1 |
| 5 | 2 | 1 | 0 | 0 | 0 |
| 5 | 4 | 1 | 1 | 0 | 0 |
| 4 | 4 | 1 | 1 | 1 | 1 |
| 4 | 5 | 1 | 1 | 0 | 0 |
| 3 | 2 | 1 | 0 | 0 | 1 |
| 5 | 3 | 1 | 0 | 0 | 1 |
| 5 | 2 | 0 | 0 | 1 | 0 |
| 4 | 2 | 1 | 0 | 0 | 0 |
| 5 | 2 | 1 | 1 | 0 | 0 |
| 3 | 2 | 0 | 1 | 0 | 0 |
| 4 | 2 | 1 | 0 | 0 | 0 |
| 4 | 3 | 0 | 0 | 0 | 1 |
| 5 | 2 | 0 | 1 | 1 | 0 |
| 5 | 2 | 0 | 0 | 1 | 0 |
| 5 | 2 | 0 | 0 | 0 | 0 |
| 5 | 2 | 1 | 0 | 0 | 0 |
| 5 | 3 | 1 | 0 | 0 | 1 |
| 5 | 2 | 0 | 0 | 0 | 1 |
| 4 | 2 | 0 | 1 | 0 | 0 |
| 4 | 2 | 1 | 0 | 0 | 0 |
| 5 | 2 | 0 | 0 | 0 | 1 |

|   |   |   |   |   |   |
|---|---|---|---|---|---|
| 5 | 4 | 0 | 1 | 0 | 0 |
| 5 | 2 | 0 | 0 | 0 | 0 |
| 2 | 2 | 1 | 0 | 0 | 1 |
| 5 | 2 | 1 | 0 | 0 | 0 |
| 4 | 2 | 1 | 0 | 0 | 0 |
| 4 | 2 | 1 | 0 | 0 | 0 |
| 5 | 2 | 0 | 0 | 0 | 1 |
| 5 | 2 | 0 | 0 | 0 | 1 |
| 3 | 2 | 1 | 0 | 0 | 0 |
| 4 | 2 | 0 | 0 | 0 | 1 |
| 4 | 2 | 1 | 0 | 0 | 0 |
| 3 | 2 | 0 | 1 | 1 | 0 |
| 4 | 2 | 1 | 0 | 0 | 0 |
| 4 | 2 | 0 | 0 | 0 | 1 |
| 2 | 2 | 1 | 0 | 0 | 0 |
| 4 | 2 | 0 | 1 | 0 | 0 |
| 5 | 2 | 0 | 0 | 1 | 0 |
| 5 | 3 | 0 | 0 | 0 | 1 |
| 5 | 3 | 0 | 1 | 0 | 1 |
| 5 | 2 | 0 | 0 | 0 | 1 |
| 3 | 2 | 1 | 0 | 0 | 1 |
| 5 | 2 | 0 | 0 | 0 | 0 |
| 4 | 4 | 1 | 1 | 0 | 0 |
| 4 | 2 | 1 | 0 | 0 | 0 |
| 3 | 3 | 1 | 1 | 1 | 0 |
| 5 | 2 | 1 | 0 | 0 | 1 |
| 5 | 2 | 1 | 1 | 0 | 0 |
| 5 | 3 | 0 | 1 | 1 | 1 |
| 5 | 6 | 1 | 1 | 1 | 0 |
| 5 | 6 | 1 | 1 | 1 | 1 |
| 5 | 5 | 1 | 1 | 1 | 0 |
| 5 | 2 | 0 | 0 | 0 | 0 |
| 4 | 2 | 0 | 1 | 0 | 0 |
| 5 | 4 | 1 | 0 | 1 | 0 |
| 5 | 2 | 0 | 1 | 0 | 0 |
| 5 | 3 | 0 | 1 | 1 | 0 |
| 5 | 3 | 1 | 0 | 0 | 0 |
| 5 | 4 | 0 | 0 | 1 | 1 |
| 4 | 4 | 1 | 1 | 1 | 0 |
| 4 | 3 | 1 | 1 | 1 | 0 |
| 3 | 4 | 1 | 0 | 1 | 1 |
| 5 | 3 | 1 | 1 | 1 | 0 |
| 5 | 3 | 1 | 1 | 0 | 0 |
| 2 | 2 | 1 | 0 | 0 | 1 |
| 2 | 3 | 1 | 1 | 1 | 0 |
| 5 | 5 | 1 | 1 | 0 | 1 |
| 5 | 4 | 1 | 1 | 0 | 1 |
| 4 | 3 | 0 | 1 | 0 | 1 |

|   |   |   |   |   |   |
|---|---|---|---|---|---|
| 5 | 6 | 1 | 1 | 1 | 1 |
| 5 | 3 | 0 | 1 | 0 | 0 |
| 5 | 4 | 0 | 1 | 0 | 1 |
| 3 | 3 | 1 | 1 | 0 | 0 |
| 5 | 3 | 1 | 0 | 1 | 0 |
| 5 | 4 | 0 | 1 | 1 | 0 |
| 5 | 4 | 1 | 1 | 1 | 0 |
| 5 | 3 | 0 | 0 | 1 | 0 |
| 5 | 4 | 0 | 0 | 1 | 0 |
| 5 | 3 | 0 | 1 | 1 | 0 |
| 5 | 3 | 0 | 1 | 0 | 1 |
| 5 | 3 | 1 | 0 | 0 | 1 |
| 5 | 3 | 1 | 0 | 0 | 0 |
| 5 | 3 | 1 | 1 | 0 | 1 |
| 4 | 4 | 1 | 1 | 0 | 1 |
| 5 | 2 | 1 | 0 | 0 | 0 |
| 4 | 2 | 0 | 0 | 0 | 1 |
| 5 | 2 | 0 | 0 | 0 | 1 |
| 3 | 3 | 1 | 0 | 0 | 1 |
| 5 | 3 | 0 | 0 | 1 | 0 |
| 5 | 3 | 1 | 0 | 0 | 0 |
| 5 | 3 | 0 | 0 | 0 | 0 |
| 5 | 2 | 1 | 0 | 0 | 0 |
| 5 | 2 | 0 | 0 | 0 | 0 |
| 4 | 2 | 1 | 0 | 0 | 0 |
| 5 | 3 | 0 | 0 | 1 | 0 |
| 4 | 3 | 1 | 0 | 0 | 0 |
| 5 | 2 | 0 | 1 | 0 | 0 |
| 5 | 2 | 0 | 0 | 0 | 0 |
| 4 | 2 | 1 | 0 | 0 | 0 |
| 3 | 3 | 1 | 1 | 1 | 0 |
| 5 | 2 | 1 | 0 | 0 | 0 |
| 3 | 2 | 1 | 0 | 0 | 1 |
| 5 | 4 | 1 | 0 | 1 | 1 |
| 5 | 2 | 1 | 0 | 0 | 0 |
| 4 | 2 | 0 | 0 | 0 | 1 |
| 3 | 2 | 1 | 0 | 0 | 1 |
| 5 | 4 | 0 | 1 | 0 | 1 |
| 3 | 3 | 1 | 1 | 0 | 0 |
| 3 | 2 | 0 | 0 | 0 | 1 |
| 3 | 2 | 1 | 1 | 0 | 0 |
| 3 | 2 | 1 | 0 | 0 | 0 |
| 2 | 2 | 0 | 0 | 0 | 1 |
| 4 | 3 | 1 | 1 | 0 | 1 |
| 3 | 2 | 1 | 0 | 0 | 0 |
| 3 | 3 | 0 | 1 | 0 | 1 |
| 4 | 4 | 1 | 0 | 0 | 1 |
| 4 | 2 | 1 | 1 | 0 | 0 |

|   |   |   |   |   |   |
|---|---|---|---|---|---|
| 2 | 3 | 1 | 1 | 0 | 0 |
| 2 | 2 | 1 | 0 | 0 | 0 |
| 2 | 2 | 1 | 0 | 0 | 0 |
| 4 | 4 | 1 | 1 | 1 | 0 |
| 2 | 2 | 1 | 1 | 0 | 0 |
| 2 | 2 | 1 | 0 | 0 | 0 |
| 4 | 3 | 1 | 1 | 0 | 1 |
| 3 | 2 | 0 | 1 | 0 | 0 |
| 2 | 2 | 1 | 0 | 0 | 0 |
| 4 | 2 | 1 | 1 | 0 | 0 |
| 4 | 2 | 1 | 0 | 0 | 1 |
| 3 | 4 | 1 | 1 | 0 | 0 |
| 4 | 2 | 0 | 1 | 0 | 1 |
| 3 | 2 | 1 | 0 | 0 | 1 |
| 4 | 3 | 0 | 1 | 0 | 1 |
| 2 | 2 | 0 | 1 | 0 | 0 |
| 1 | 2 | 1 | 0 | 0 | 1 |
| 1 | 2 | 1 | 0 | 0 | 1 |
| 4 | 3 | 1 | 1 | 0 | 0 |
| 5 | 2 | 0 | 1 | 1 | 0 |
| 5 | 3 | 1 | 1 | 0 | 1 |
| 5 | 5 | 1 | 1 | 0 | 1 |
| 4 | 5 | 1 | 1 | 1 | 0 |
| 5 | 2 | 0 | 0 | 1 | 0 |
| 5 | 4 | 1 | 1 | 0 | 1 |
| 4 | 3 | 1 | 1 | 0 | 1 |
| 3 | 2 | 0 | 1 | 0 | 0 |
| 5 | 3 | 0 | 0 | 1 | 0 |
| 4 | 2 | 1 | 0 | 0 | 1 |
| 3 | 3 | 0 | 0 | 1 | 0 |
| 3 | 2 | 1 | 0 | 0 | 0 |
| 5 | 3 | 1 | 1 | 0 | 0 |
| 4 | 2 | 1 | 1 | 0 | 0 |
| 3 | 6 | 1 | 1 | 1 | 1 |
| 4 | 4 | 0 | 1 | 0 | 1 |
| 4 | 5 | 1 | 1 | 1 | 1 |
| 3 | 4 | 1 | 1 | 0 | 1 |
| 4 | 3 | 1 | 1 | 0 | 0 |
| 4 | 4 | 1 | 1 | 0 | 1 |
| 2 | 2 | 1 | 0 | 0 | 0 |
| 3 | 3 | 0 | 0 | 0 | 0 |
| 4 | 3 | 1 | 0 | 0 | 1 |
| 2 | 2 | 1 | 0 | 0 | 0 |
| 1 | 2 | 0 | 0 | 0 | 1 |
| 2 | 3 | 1 | 1 | 0 | 0 |
| 5 | 2 | 1 | 1 | 0 | 0 |
| 3 | 2 | 1 | 0 | 0 | 0 |
| 3 | 2 | 1 | 1 | 0 | 0 |

|   |   |   |   |   |   |
|---|---|---|---|---|---|
| 3 | 4 | 1 | 0 | 0 | 1 |
| 4 | 4 | 1 | 1 | 0 | 1 |
| 3 | 2 | 1 | 0 | 0 | 0 |
| 2 | 4 | 1 | 1 | 0 | 1 |
| 2 | 3 | 0 | 1 | 0 | 1 |
| 4 | 2 | 0 | 1 | 0 | 0 |
| 3 | 2 | 1 | 0 | 0 | 0 |
| 4 | 2 | 1 | 0 | 1 | 0 |
| 2 | 2 | 0 | 1 | 0 | 0 |
| 2 | 2 | 1 | 0 | 0 | 0 |
| 4 | 2 | 1 | 0 | 0 | 0 |
| 2 | 2 | 0 | 1 | 0 | 0 |
| 2 | 2 | 1 | 0 | 0 | 0 |
| 4 | 4 | 1 | 1 | 0 | 1 |
| 1 | 2 | 1 | 1 | 0 | 0 |
| 3 | 3 | 1 | 0 | 0 | 1 |
| 2 | 3 | 1 | 1 | 0 | 0 |
| 2 | 2 | 0 | 0 | 0 | 0 |
| 3 | 3 | 0 | 1 | 1 | 0 |
| 3 | 2 | 0 | 1 | 0 | 0 |
| 4 | 4 | 0 | 1 | 0 | 1 |
| 3 | 4 | 0 | 1 | 0 | 1 |
| 4 | 2 | 1 | 0 | 0 | 0 |
| 2 | 3 | 1 | 0 | 0 | 1 |
| 2 | 2 | 1 | 0 | 0 | 0 |
| 4 | 4 | 1 | 1 | 0 | 1 |
| 4 | 2 | 1 | 0 | 0 | 0 |
| 4 | 3 | 0 | 0 | 1 | 1 |
| 4 | 2 | 1 | 0 | 0 | 0 |
| 4 | 2 | 1 | 1 | 0 | 0 |
| 4 | 4 | 1 | 1 | 0 | 1 |
| 5 | 3 | 1 | 1 | 0 | 1 |
| 4 | 3 | 1 | 1 | 0 | 1 |
| 3 | 2 | 1 | 0 | 0 | 0 |
| 2 | 2 | 1 | 1 | 0 | 0 |
| 3 | 2 | 1 | 0 | 0 | 0 |
| 4 | 3 | 1 | 1 | 0 | 0 |
| 1 | 5 | 1 | 0 | 1 | 0 |
| 4 | 3 | 1 | 0 | 0 | 1 |
| 4 | 6 | 1 | 1 | 1 | 1 |
| 4 | 3 | 1 | 1 | 0 | 1 |
| 5 | 4 | 1 | 1 | 0 | 1 |
| 5 | 3 | 0 | 1 | 0 | 1 |
| 5 | 3 | 0 | 1 | 1 | 1 |
| 2 | 3 | 1 | 1 | 0 | 1 |
| 2 | 2 | 1 | 1 | 0 | 0 |
| 4 | 3 | 1 | 0 | 0 | 1 |
| 4 | 3 | 1 | 1 | 0 | 1 |



|   |   |   |   |   |   |
|---|---|---|---|---|---|
| 5 | 2 | 1 | 0 | 0 | 0 |
| 3 | 2 | 1 | 0 | 0 | 0 |
| 3 | 3 | 1 | 0 | 0 | 1 |
| 4 | 3 | 1 | 1 | 0 | 1 |
| 2 | 3 | 1 | 0 | 0 | 1 |
| 3 | 2 | 1 | 1 | 0 | 0 |
| 2 | 2 | 1 | 0 | 0 | 0 |
| 3 | 2 | 1 | 0 | 0 | 0 |
| 3 | 3 | 1 | 1 | 0 | 1 |
| 3 | 2 | 0 | 0 | 0 | 1 |
| 2 | 2 | 1 | 0 | 0 | 0 |
| 4 | 3 | 1 | 0 | 0 | 0 |
| 4 | 2 | 1 | 0 | 0 | 0 |
| 2 | 2 | 0 | 0 | 0 | 1 |
| 2 | 2 | 1 | 0 | 0 | 0 |
| 3 | 3 | 1 | 0 | 0 | 1 |
| 4 | 2 | 0 | 0 | 0 | 1 |
| 4 | 2 | 1 | 0 | 0 | 1 |
| 4 | 3 | 1 | 0 | 0 | 1 |
| 3 | 2 | 1 | 0 | 0 | 1 |
| 4 | 2 | 1 | 1 | 0 | 0 |
| 3 | 3 | 1 | 0 | 0 | 1 |
| 5 | 5 | 1 | 1 | 1 | 0 |
| 4 | 4 | 1 | 1 | 0 | 1 |
| 4 | 4 | 1 | 1 | 0 | 1 |
| 3 | 3 | 1 | 1 | 0 | 0 |
| 3 | 3 | 1 | 1 | 0 | 1 |
| 4 | 3 | 0 | 1 | 0 | 1 |
| 5 | 2 | 0 | 1 | 0 | 0 |
| 3 | 3 | 1 | 0 | 1 | 0 |
| 4 | 4 | 1 | 1 | 0 | 0 |
| 4 | 4 | 1 | 0 | 0 | 1 |
| 3 | 3 | 1 | 1 | 0 | 1 |
| 4 | 4 | 1 | 1 | 0 | 1 |
| 2 | 2 | 1 | 1 | 0 | 0 |
| 4 | 4 | 0 | 0 | 1 | 1 |
| 2 | 4 | 0 | 1 | 0 | 1 |
| 4 | 3 | 1 | 1 | 0 | 1 |
| 2 | 3 | 1 | 0 | 0 | 1 |
| 5 | 4 | 0 | 1 | 1 | 0 |
| 5 | 3 | 1 | 1 | 0 | 1 |
| 1 | 3 | 1 | 0 | 0 | 1 |
| 3 | 2 | 1 | 0 | 0 | 0 |
| 1 | 3 | 1 | 1 | 0 | 0 |
| 2 | 3 | 1 | 0 | 0 | 0 |
| 5 | 4 | 1 | 1 | 1 | 1 |
| 2 | 4 | 1 | 1 | 0 | 1 |
| 3 | 3 | 1 | 0 | 0 | 0 |

|   |   |   |   |   |   |
|---|---|---|---|---|---|
| 1 | 4 | 1 | 1 | 1 | 0 |
| 5 | 4 | 1 | 0 | 0 | 1 |
| 3 | 2 | 1 | 0 | 0 | 0 |
| 2 | 2 | 1 | 0 | 0 | 0 |
| 2 | 2 | 0 | 1 | 0 | 0 |
| 3 | 2 | 1 | 0 | 0 | 1 |
| 4 | 2 | 1 | 0 | 0 | 0 |
| 2 | 2 | 1 | 0 | 0 | 0 |
| 3 | 2 | 0 | 1 | 0 | 1 |
| 4 | 2 | 1 | 0 | 0 | 0 |
| 3 | 2 | 1 | 0 | 0 | 1 |
| 3 | 2 | 1 | 1 | 0 | 0 |
| 2 | 3 | 0 | 1 | 0 | 0 |
| 4 | 7 | 1 | 1 | 1 | 1 |

| Lower extremity | Spine | Pelvis | FJI | SSTI | Destruction | CNSI | PC |
|-----------------|-------|--------|-----|------|-------------|------|----|
| 1               | 0     | 0      | 1   | 1    | 0           | 0    | 1  |
| 0               | 0     | 0      | 1   | 1    | 0           | 1    | 0  |
| 1               | 0     | 0      | 1   | 1    | 0           | 0    | 0  |
| 1               | 0     | 0      | 1   | 1    | 0           | 0    | 0  |
| 0               | 0     | 0      | 1   | 1    | 0           | 0    | 0  |
| 1               | 0     | 0      | 1   | 1    | 0           | 1    | 1  |
| 0               | 0     | 0      | 1   | 1    | 0           | 1    | 0  |
| 0               | 0     | 1      | 1   | 1    | 0           | 0    | 0  |
| 0               | 0     | 1      | 1   | 0    | 0           | 1    | 1  |
| 1               | 0     | 0      | 1   | 0    | 0           | 1    | 1  |
| 0               | 0     | 0      | 1   | 1    | 0           | 1    | 0  |
| 1               | 0     | 0      | 1   | 1    | 0           | 1    | 0  |
| 0               | 0     | 0      | 0   | 1    | 0           | 0    | 0  |
| 0               | 0     | 0      | 1   | 1    | 0           | 0    | 1  |
| 0               | 0     | 0      | 0   | 1    | 0           | 0    | 0  |
| 0               | 0     | 0      | 1   | 1    | 0           | 0    | 0  |
| 0               | 1     | 0      | 1   | 1    | 0           | 1    | 0  |
| 0               | 0     | 0      | 1   | 1    | 0           | 1    | 1  |
| 0               | 0     | 0      | 1   | 1    | 0           | 1    | 0  |
| 1               | 0     | 0      | 1   | 0    | 0           | 1    | 1  |
| 1               | 0     | 0      | 0   | 1    | 0           | 1    | 0  |
| 1               | 0     | 0      | 1   | 1    | 0           | 0    | 0  |
| 0               | 0     | 1      | 1   | 1    | 0           | 0    | 1  |
| 0               | 0     | 0      | 1   | 1    | 0           | 0    | 1  |
| 1               | 0     | 0      | 1   | 1    | 0           | 1    | 0  |
| 0               | 0     | 0      | 1   | 1    | 0           | 0    | 1  |
| 0               | 0     | 0      | 1   | 1    | 0           | 1    | 0  |
| 1               | 0     | 0      | 0   | 1    | 0           | 1    | 0  |
| 1               | 0     | 0      | 1   | 1    | 0           | 1    | 0  |
| 1               | 0     | 0      | 1   | 1    | 0           | 1    | 0  |
| 0               | 0     | 0      | 1   | 1    | 0           | 1    | 1  |
| 1               | 1     | 1      | 1   | 1    | 0           | 0    | 1  |
| 0               | 0     | 0      | 1   | 1    | 0           | 1    | 1  |
| 1               | 0     | 0      | 1   | 1    | 0           | 1    | 1  |
| 0               | 0     | 1      | 1   | 1    | 0           | 0    | 0  |
| 1               | 0     | 1      | 1   | 1    | 0           | 1    | 0  |
| 1               | 1     | 0      | 1   | 1    | 0           | 0    | 0  |
| 0               | 0     | 0      | 1   | 1    | 0           | 0    | 1  |
| 1               | 0     | 0      | 1   | 1    | 0           | 0    | 0  |
| 1               | 0     | 1      | 1   | 1    | 0           | 0    | 1  |
| 0               | 0     | 0      | 0   | 1    | 0           | 1    | 0  |
| 0               | 1     | 0      | 1   | 1    | 0           | 0    | 1  |
| 0               | 0     | 0      | 1   | 1    | 0           | 0    | 1  |
| 0               | 1     | 0      | 1   | 1    | 0           | 1    | 0  |
| 0               | 0     | 0      | 1   | 1    | 0           | 1    | 0  |
| 0               | 1     | 0      | 1   | 1    | 0           | 1    | 0  |
| 1               | 0     | 0      | 1   | 1    | 0           | 1    | 0  |

|   |   |   |   |   |   |   |   |
|---|---|---|---|---|---|---|---|
| 0 | 0 | 1 | 1 | 1 | 0 | 0 | 0 |
| 0 | 1 | 0 | 1 | 1 | 0 | 1 | 1 |
| 0 | 0 | 0 | 1 | 1 | 0 | 0 | 1 |
| 0 | 1 | 0 | 1 | 1 | 0 | 0 | 1 |
| 1 | 0 | 0 | 1 | 0 | 0 | 0 | 1 |
| 1 | 1 | 1 | 1 | 1 | 0 | 1 | 1 |
| 1 | 0 | 1 | 1 | 1 | 0 | 1 | 1 |
| 1 | 1 | 0 | 1 | 1 | 0 | 1 | 1 |
| 1 | 0 | 0 | 1 | 1 | 0 | 0 | 0 |
| 0 | 0 | 0 | 1 | 1 | 0 | 0 | 0 |
| 0 | 0 | 0 | 1 | 1 | 0 | 1 | 1 |
| 0 | 0 | 0 | 1 | 0 | 0 | 1 | 1 |
| 1 | 1 | 0 | 1 | 1 | 0 | 0 | 1 |
| 1 | 0 | 0 | 1 | 1 | 0 | 0 | 1 |
| 1 | 0 | 0 | 1 | 1 | 0 | 1 | 0 |
| 0 | 0 | 1 | 1 | 1 | 0 | 1 | 1 |
| 0 | 1 | 1 | 1 | 1 | 0 | 1 | 1 |
| 1 | 0 | 1 | 1 | 1 | 0 | 0 | 0 |
| 1 | 1 | 0 | 1 | 0 | 0 | 0 | 0 |
| 0 | 0 | 0 | 0 | 0 | 0 | 1 | 1 |
| 0 | 0 | 0 | 1 | 1 | 0 | 0 | 1 |
| 1 | 0 | 0 | 1 | 1 | 0 | 1 | 0 |
| 0 | 1 | 0 | 1 | 1 | 0 | 1 | 1 |
| 0 | 1 | 0 | 1 | 1 | 0 | 1 | 1 |
| 0 | 1 | 0 | 1 | 1 | 0 | 1 | 1 |
| 0 | 0 | 0 | 1 | 1 | 0 | 1 | 0 |
| 1 | 0 | 0 | 1 | 1 | 0 | 0 | 0 |
| 0 | 1 | 0 | 1 | 1 | 0 | 0 | 0 |
| 0 | 1 | 0 | 1 | 1 | 0 | 1 | 0 |
| 0 | 0 | 0 | 1 | 1 | 0 | 1 | 0 |
| 0 | 1 | 0 | 1 | 1 | 0 | 1 | 1 |
| 0 | 0 | 0 | 1 | 1 | 0 | 0 | 0 |
| 0 | 0 | 0 | 1 | 1 | 0 | 0 | 0 |
| 0 | 0 | 0 | 1 | 1 | 0 | 1 | 0 |
| 0 | 1 | 0 | 1 | 1 | 0 | 1 | 1 |
| 0 | 0 | 0 | 1 | 1 | 0 | 0 | 1 |
| 0 | 0 | 0 | 1 | 1 | 0 | 1 | 0 |
| 0 | 1 | 1 | 1 | 1 | 0 | 0 | 0 |
| 0 | 0 | 0 | 1 | 1 | 0 | 1 | 1 |
| 1 | 0 | 0 | 1 | 1 | 0 | 0 | 0 |
| 0 | 0 | 0 | 1 | 1 | 0 | 1 | 0 |

|   |   |   |   |   |   |   |   |
|---|---|---|---|---|---|---|---|
| 0 | 0 | 0 | 1 | 1 | 0 | 1 | 0 |
| 0 | 0 | 0 | 1 | 1 | 0 | 1 | 1 |
| 0 | 0 | 0 | 1 | 1 | 0 | 0 | 1 |
| 1 | 0 | 1 | 1 | 0 | 0 | 0 | 1 |
| 0 | 0 | 0 | 1 | 0 | 0 | 1 | 1 |
| 0 | 0 | 0 | 1 | 0 | 0 | 0 | 0 |
| 0 | 1 | 0 | 1 | 0 | 0 | 1 | 0 |
| 0 | 0 | 0 | 1 | 1 | 0 | 0 | 1 |
| 0 | 0 | 0 | 1 | 0 | 0 | 1 | 0 |
| 1 | 0 | 0 | 1 | 1 | 0 | 0 | 0 |
| 0 | 0 | 0 | 1 | 1 | 0 | 1 | 0 |
| 0 | 1 | 0 | 1 | 1 | 0 | 0 | 0 |
| 0 | 0 | 0 | 1 | 1 | 0 | 0 | 0 |
| 0 | 0 | 0 | 1 | 1 | 0 | 1 | 0 |
| 0 | 0 | 0 | 1 | 0 | 0 | 0 | 0 |
| 0 | 0 | 0 | 1 | 1 | 0 | 1 | 1 |
| 1 | 0 | 0 | 1 | 0 | 0 | 1 | 0 |
| 1 | 0 | 0 | 1 | 1 | 0 | 1 | 1 |
| 0 | 1 | 1 | 1 | 1 | 0 | 0 | 1 |
| 0 | 1 | 0 | 1 | 1 | 0 | 0 | 1 |
| 0 | 0 | 0 | 1 | 1 | 0 | 1 | 1 |
| 0 | 0 | 0 | 1 | 1 | 0 | 0 | 1 |
| 0 | 0 | 1 | 1 | 1 | 0 | 1 | 1 |
| 0 | 0 | 0 | 1 | 1 | 0 | 1 | 1 |
| 1 | 0 | 0 | 0 | 1 | 0 | 1 | 0 |
| 1 | 0 | 0 | 1 | 0 | 0 | 0 | 0 |
| 0 | 0 | 0 | 0 | 1 | 0 | 0 | 0 |
| 1 | 1 | 1 | 1 | 1 | 0 | 0 | 0 |
| 0 | 0 | 0 | 1 | 1 | 0 | 1 | 0 |
| 0 | 0 | 1 | 1 | 0 | 0 | 0 | 0 |
| 1 | 0 | 0 | 1 | 1 | 0 | 1 | 0 |
| 0 | 0 | 0 | 1 | 1 | 0 | 1 | 0 |
| 0 | 1 | 0 | 1 | 1 | 0 | 0 | 0 |
| 1 | 0 | 0 | 1 | 1 | 0 | 0 | 0 |
| 0 | 0 | 0 | 1 | 1 | 0 | 0 | 0 |
| 0 | 1 | 0 | 1 | 1 | 0 | 0 | 0 |
| 1 | 0 | 0 | 1 | 1 | 0 | 0 | 0 |
| 0 | 1 | 1 | 1 | 0 | 0 | 0 | 0 |
| 0 | 0 | 1 | 1 | 0 | 0 | 0 | 0 |
| 1 | 0 | 0 | 1 | 0 | 0 | 0 | 0 |
| 1 | 0 | 0 | 0 | 1 | 0 | 0 | 0 |
| 0 | 0 | 1 | 1 | 1 | 0 | 0 | 0 |
| 0 | 0 | 0 | 1 | 1 | 0 | 0 | 0 |
| 1 | 0 | 0 | 1 | 1 | 0 | 0 | 1 |
| 0 | 0 | 0 | 1 | 1 | 0 | 1 | 0 |
| 1 | 0 | 0 | 1 | 1 | 0 | 1 | 0 |
| 1 | 0 | 0 | 1 | 1 | 0 | 0 | 0 |
| 0 | 1 | 0 | 1 | 0 | 0 | 0 | 0 |

|   |   |   |   |   |   |   |   |
|---|---|---|---|---|---|---|---|
| 0 | 0 | 0 | 1 | 0 | 0 | 1 | 1 |
| 0 | 0 | 0 | 1 | 1 | 0 | 0 | 0 |
| 0 | 0 | 0 | 1 | 1 | 0 | 1 | 0 |
| 0 | 0 | 0 | 0 | 1 | 0 | 1 | 0 |
| 0 | 0 | 0 | 1 | 1 | 0 | 1 | 0 |
| 0 | 0 | 0 | 1 | 1 | 0 | 1 | 0 |
| 0 | 1 | 0 | 1 | 0 | 0 | 1 | 0 |
| 0 | 0 | 0 | 1 | 1 | 0 | 1 | 1 |
| 0 | 0 | 0 | 0 | 1 | 0 | 1 | 1 |
| 0 | 0 | 1 | 1 | 1 | 0 | 1 | 0 |
| 1 | 0 | 0 | 1 | 0 | 0 | 1 | 0 |
| 1 | 0 | 0 | 1 | 1 | 0 | 0 | 0 |
| 0 | 0 | 0 | 1 | 0 | 0 | 0 | 0 |
| 0 | 0 | 0 | 1 | 1 | 0 | 1 | 0 |
| 0 | 0 | 0 | 0 | 1 | 0 | 0 | 0 |
| 0 | 0 | 0 | 0 | 1 | 0 | 1 | 1 |
| 1 | 0 | 0 | 1 | 1 | 0 | 0 | 0 |
| 0 | 0 | 1 | 1 | 1 | 0 | 0 | 0 |
| 0 | 1 | 0 | 1 | 1 | 0 | 1 | 0 |
| 1 | 0 | 0 | 1 | 1 | 0 | 0 | 0 |
| 0 | 0 | 0 | 1 | 0 | 0 | 0 | 1 |
| 1 | 0 | 0 | 1 | 1 | 0 | 0 | 0 |
| 1 | 1 | 0 | 1 | 0 | 0 | 0 | 0 |
| 0 | 0 | 0 | 0 | 1 | 0 | 1 | 0 |
| 1 | 0 | 0 | 1 | 1 | 0 | 0 | 0 |
| 1 | 0 | 0 | 1 | 1 | 0 | 1 | 0 |
| 0 | 0 | 0 | 1 | 1 | 0 | 1 | 1 |
| 0 | 0 | 0 | 1 | 0 | 0 | 1 | 1 |
| 0 | 0 | 0 | 1 | 1 | 0 | 0 | 0 |
| 0 | 0 | 0 | 1 | 1 | 0 | 1 | 0 |
| 0 | 0 | 0 | 1 | 1 | 0 | 1 | 0 |
| 0 | 0 | 0 | 1 | 0 | 0 | 0 | 0 |
| 1 | 0 | 1 | 1 | 1 | 0 | 0 | 1 |
| 1 | 0 | 0 | 1 | 1 | 0 | 0 | 0 |
| 0 | 0 | 1 | 1 | 0 | 0 | 0 | 0 |
| 0 | 1 | 0 | 1 | 0 | 0 | 0 | 1 |
| 0 | 1 | 0 | 1 | 0 | 0 | 0 | 1 |
| 0 | 0 | 0 | 1 | 0 | 0 | 1 | 0 |
| 0 | 0 | 0 | 1 | 1 | 0 | 0 | 0 |
| 1 | 0 | 0 | 1 | 1 | 0 | 0 | 0 |
| 1 | 0 | 0 | 1 | 1 | 0 | 0 | 0 |
| 1 | 0 | 0 | 0 | 1 | 0 | 0 | 0 |
| 0 | 0 | 1 | 1 | 1 | 0 | 0 | 0 |
| 0 | 0 | 0 | 1 | 0 | 0 | 0 | 1 |
| 0 | 0 | 0 | 1 | 1 | 0 | 1 | 0 |
| 1 | 1 | 0 | 1 | 0 | 0 | 0 | 0 |
| 0 | 1 | 0 | 1 | 1 | 0 | 0 | 0 |
| 0 | 0 | 0 | 1 | 1 | 0 | 0 | 0 |

|   |   |   |   |   |   |   |   |
|---|---|---|---|---|---|---|---|
| 1 | 0 | 0 | 1 | 0 | 0 | 0 | 0 |
| 0 | 0 | 0 | 1 | 1 | 0 | 0 | 0 |
| 1 | 0 | 0 | 1 | 0 | 0 | 0 | 1 |
| 0 | 0 | 0 | 1 | 0 | 0 | 0 | 1 |
| 0 | 0 | 0 | 1 | 0 | 0 | 0 | 1 |
| 0 | 0 | 0 | 1 | 0 | 0 | 0 | 0 |
| 0 | 0 | 1 | 1 | 1 | 0 | 1 | 0 |
| 1 | 0 | 0 | 1 | 0 | 0 | 0 | 0 |
| 0 | 0 | 0 | 1 | 1 | 0 | 0 | 0 |
| 0 | 0 | 0 | 1 | 1 | 0 | 0 | 0 |
| 0 | 0 | 0 | 0 | 1 | 1 | 0 | 0 |
| 0 | 0 | 0 | 1 | 1 | 0 | 1 | 1 |
| 0 | 0 | 0 | 1 | 0 | 0 | 0 | 1 |
| 0 | 1 | 0 | 1 | 1 | 0 | 0 | 0 |
| 1 | 0 | 0 | 1 | 0 | 0 | 1 | 0 |
| 0 | 1 | 0 | 1 | 0 | 0 | 0 | 0 |
| 1 | 0 | 0 | 1 | 0 | 0 | 0 | 0 |
| 0 | 0 | 0 | 1 | 0 | 0 | 0 | 0 |
| 0 | 1 | 0 | 0 | 1 | 0 | 1 | 0 |
| 0 | 0 | 0 | 1 | 1 | 0 | 1 | 1 |
| 1 | 0 | 0 | 1 | 1 | 0 | 1 | 0 |
| 0 | 0 | 0 | 1 | 1 | 0 | 0 | 0 |
| 1 | 0 | 0 | 1 | 1 | 0 | 1 | 0 |
| 0 | 0 | 0 | 1 | 1 | 0 | 1 | 1 |
| 1 | 1 | 0 | 1 | 0 | 0 | 1 | 0 |
| 0 | 0 | 0 | 0 | 1 | 0 | 0 | 0 |
| 0 | 1 | 0 | 0 | 1 | 0 | 0 | 0 |
| 0 | 0 | 0 | 0 | 0 | 1 | 1 | 0 |
| 1 | 0 | 1 | 1 | 0 | 0 | 0 | 0 |
| 0 | 0 | 0 | 1 | 0 | 0 | 0 | 0 |
| 0 | 0 | 0 | 1 | 1 | 0 | 0 | 0 |
| 0 | 0 | 0 | 1 | 0 | 0 | 0 | 1 |
| 1 | 0 | 0 | 1 | 0 | 0 | 0 | 0 |
| 0 | 1 | 0 | 1 | 1 | 0 | 1 | 0 |
| 1 | 0 | 0 | 0 | 1 | 0 | 1 | 0 |
| 0 | 0 | 1 | 1 | 0 | 0 | 0 | 0 |
| 0 | 0 | 0 | 1 | 0 | 0 | 1 | 0 |
| 0 | 0 | 0 | 1 | 0 | 0 | 0 | 0 |
| 0 | 0 | 0 | 1 | 1 | 0 | 1 | 1 |
| 0 | 0 | 0 | 1 | 0 | 0 | 0 | 1 |
| 0 | 0 | 0 | 0 | 1 | 1 | 1 | 1 |
| 0 | 0 | 0 | 1 | 1 | 0 | 0 | 0 |
| 0 | 0 | 0 | 1 | 0 | 0 | 1 | 1 |
| 0 | 0 | 0 | 0 | 1 | 1 | 0 | 0 |
| 0 | 0 | 0 | 1 | 0 | 0 | 1 | 1 |
| 0 | 0 | 0 | 0 | 1 | 1 | 0 | 0 |
| 0 | 0 | 0 | 1 | 0 | 0 | 1 | 0 |
| 0 | 0 | 0 | 1 | 1 | 0 | 0 | 0 |
| 0 | 0 | 0 | 1 | 0 | 0 | 0 | 0 |

|   |   |   |   |   |   |   |   |
|---|---|---|---|---|---|---|---|
| 0 | 0 | 0 | 1 | 1 | 0 | 1 | 1 |
| 0 | 0 | 0 | 1 | 1 | 0 | 1 | 1 |
| 0 | 0 | 0 | 1 | 1 | 0 | 0 | 0 |
| 1 | 1 | 0 | 1 | 1 | 0 | 0 | 0 |
| 0 | 0 | 0 | 1 | 1 | 0 | 1 | 1 |
| 0 | 0 | 0 | 1 | 1 | 0 | 1 | 1 |
| 0 | 0 | 0 | 1 | 1 | 0 | 0 | 1 |
| 0 | 0 | 0 | 1 | 0 | 0 | 0 | 1 |
| 0 | 1 | 0 | 1 | 1 | 0 | 1 | 0 |
| 0 | 0 | 0 | 1 | 0 | 0 | 0 | 0 |
| 0 | 0 | 0 | 1 | 1 | 0 | 1 | 0 |
| 0 | 0 | 0 | 1 | 1 | 0 | 0 | 0 |
| 0 | 1 | 0 | 1 | 0 | 0 | 1 | 0 |
| 0 | 0 | 0 | 1 | 0 | 0 | 0 | 0 |
| 1 | 0 | 0 | 1 | 0 | 0 | 0 | 1 |
| 0 | 0 | 0 | 1 | 0 | 0 | 0 | 0 |
| 0 | 0 | 0 | 1 | 0 | 0 | 0 | 0 |
| 1 | 0 | 0 | 1 | 1 | 0 | 0 | 0 |
| 0 | 0 | 0 | 1 | 0 | 0 | 0 | 0 |
| 0 | 0 | 1 | 1 | 1 | 0 | 1 | 0 |
| 0 | 0 | 0 | 1 | 1 | 0 | 1 | 0 |
| 0 | 0 | 0 | 1 | 0 | 0 | 0 | 0 |
| 1 | 0 | 0 | 1 | 0 | 0 | 0 | 0 |
| 0 | 0 | 0 | 1 | 1 | 0 | 1 | 1 |
| 0 | 0 | 0 | 1 | 0 | 0 | 0 | 0 |
| 0 | 0 | 0 | 0 | 1 | 0 | 1 | 0 |
| 0 | 1 | 0 | 1 | 1 | 0 | 1 | 1 |
| 1 | 0 | 0 | 1 | 1 | 0 | 1 | 0 |
| 0 | 1 | 0 | 1 | 0 | 0 | 0 | 1 |
| 1 | 0 | 1 | 1 | 0 | 0 | 0 | 0 |
| 1 | 1 | 0 | 1 | 0 | 0 | 0 | 0 |
| 1 | 0 | 1 | 1 | 0 | 0 | 0 | 0 |
| 0 | 0 | 0 | 0 | 1 | 0 | 1 | 0 |
| 1 | 1 | 0 | 1 | 0 | 0 | 0 | 0 |
| 0 | 1 | 0 | 1 | 0 | 0 | 0 | 0 |
| 0 | 0 | 0 | 1 | 1 | 0 | 1 | 0 |
| 0 | 1 | 0 | 1 | 0 | 0 | 0 | 1 |
| 1 | 0 | 0 | 1 | 0 | 0 | 0 | 0 |
| 1 | 0 | 1 | 1 | 1 | 0 | 0 | 0 |
| 0 | 1 | 1 | 1 | 1 | 0 | 0 | 1 |
| 1 | 0 | 0 | 1 | 1 | 0 | 0 | 0 |
| 0 | 1 | 0 | 1 | 1 | 0 | 0 | 0 |
| 1 | 0 | 0 | 1 | 1 | 0 | 1 | 0 |
| 1 | 0 | 0 | 1 | 1 | 0 | 0 | 0 |
| 0 | 1 | 0 | 1 | 1 | 0 | 1 | 0 |
| 0 | 1 | 0 | 1 | 1 | 0 | 1 | 0 |
| 0 | 0 | 0 | 1 | 1 | 0 | 1 | 1 |





|   |   |   |   |   |   |   |   |
|---|---|---|---|---|---|---|---|
| 1 | 0 | 1 | 1 | 1 | 0 | 1 | 0 |
| 0 | 0 | 1 | 1 | 1 | 0 | 1 | 1 |
| 1 | 0 | 0 | 1 | 0 | 0 | 1 | 0 |
| 1 | 0 | 0 | 1 | 1 | 0 | 0 | 1 |
| 0 | 1 | 0 | 1 | 1 | 0 | 1 | 1 |
| 0 | 0 | 0 | 1 | 1 | 0 | 0 | 1 |
| 1 | 0 | 0 | 1 | 1 | 0 | 1 | 1 |
| 0 | 0 | 0 | 1 | 1 | 0 | 1 | 1 |
| 1 | 0 | 0 | 0 | 1 | 0 | 1 | 1 |
| 0 | 1 | 1 | 1 | 1 | 0 | 1 | 0 |
| 1 | 0 | 0 | 1 | 1 | 0 | 1 | 1 |
| 0 | 1 | 0 | 1 | 1 | 0 | 0 | 1 |
| 1 | 0 | 0 | 1 | 1 | 0 | 1 | 0 |
| 0 | 0 | 0 | 1 | 1 | 0 | 1 | 0 |
| 1 | 0 | 0 | 1 | 1 | 0 | 0 | 0 |
| 0 | 0 | 0 | 1 | 1 | 0 | 1 | 0 |
| 1 | 0 | 0 | 1 | 1 | 0 | 0 | 0 |
| 1 | 0 | 0 | 1 | 1 | 0 | 1 | 0 |
| 0 | 1 | 0 | 1 | 1 | 0 | 1 | 0 |
| 0 | 0 | 0 | 1 | 1 | 0 | 1 | 0 |
| 1 | 0 | 0 | 1 | 1 | 0 | 0 | 0 |
| 0 | 0 | 0 | 1 | 1 | 0 | 1 | 0 |
| 0 | 0 | 0 | 0 | 1 | 0 | 1 | 0 |
| 0 | 0 | 0 | 0 | 1 | 0 | 1 | 0 |
| 1 | 0 | 0 | 1 | 1 | 0 | 1 | 0 |
| 0 | 0 | 0 | 1 | 1 | 0 | 1 | 0 |
| 1 | 0 | 0 | 1 | 1 | 0 | 0 | 0 |
| 1 | 1 | 0 | 1 | 1 | 0 | 0 | 0 |
| 0 | 0 | 0 | 1 | 1 | 0 | 1 | 0 |
| 0 | 0 | 0 | 1 | 1 | 0 | 0 | 0 |
| 0 | 0 | 0 | 0 | 1 | 0 | 1 | 0 |
| 0 | 0 | 0 | 0 | 1 | 0 | 1 | 0 |
| 1 | 0 | 0 | 1 | 1 | 0 | 0 | 0 |
| 0 | 0 | 0 | 1 | 1 | 0 | 1 | 0 |
| 1 | 0 | 0 | 1 | 1 | 0 | 0 | 0 |
| 0 | 1 | 0 | 1 | 1 | 0 | 1 | 0 |
| 1 | 0 | 0 | 0 | 1 | 0 | 1 | 0 |
| 1 | 0 | 0 | 1 | 1 | 0 | 0 | 0 |
| 0 | 1 | 0 | 1 | 1 | 0 | 1 | 0 |
| 0 | 1 | 0 | 1 | 1 | 0 | 1 | 0 |
| 0 | 1 | 0 | 1 | 0 | 0 | 0 | 0 |
| 1 | 1 | 0 | 1 | 1 | 0 | 1 | 0 |
| 1 | 0 | 0 | 1 | 0 | 0 | 0 | 0 |

|   |   |   |   |   |   |   |   |
|---|---|---|---|---|---|---|---|
| 0 | 0 | 0 | 1 | 1 | 0 | 1 | 0 |
| 1 | 0 | 0 | 1 | 1 | 0 | 0 | 1 |
| 1 | 0 | 0 | 1 | 0 | 0 | 1 | 0 |
| 1 | 0 | 0 | 1 | 1 | 0 | 0 | 1 |
| 0 | 0 | 0 | 1 | 1 | 0 | 1 | 1 |
| 0 | 0 | 1 | 1 | 1 | 0 | 1 | 1 |
| 1 | 1 | 1 | 1 | 0 | 0 | 0 | 0 |
| 1 | 1 | 1 | 1 | 0 | 0 | 0 | 1 |
| 1 | 0 | 0 | 1 | 1 | 0 | 1 | 0 |
| 1 | 1 | 1 | 1 | 1 | 0 | 1 | 1 |
| 1 | 0 | 0 | 1 | 1 | 0 | 0 | 1 |
| 0 | 1 | 0 | 1 | 1 | 0 | 1 | 1 |
| 0 | 1 | 0 | 1 | 1 | 0 | 1 | 1 |
| 0 | 1 | 0 | 1 | 1 | 0 | 1 | 1 |
| 0 | 1 | 1 | 1 | 1 | 0 | 1 | 0 |
| 0 | 1 | 1 | 1 | 1 | 0 | 1 | 0 |
| 1 | 0 | 1 | 1 | 1 | 1 | 0 | 1 |
| 0 | 1 | 0 | 1 | 0 | 0 | 0 | 0 |
| 1 | 1 | 0 | 1 | 1 | 0 | 0 | 0 |
| 0 | 1 | 0 | 1 | 0 | 0 | 0 | 1 |
| 1 | 0 | 0 | 1 | 1 | 0 | 0 | 0 |
| 0 | 0 | 0 | 1 | 0 | 0 | 1 | 1 |
| 1 | 0 | 0 | 1 | 1 | 0 | 1 | 0 |
| 0 | 0 | 0 | 1 | 0 | 0 | 1 | 0 |
| 0 | 1 | 0 | 1 | 0 | 0 | 0 | 0 |
| 0 | 1 | 0 | 1 | 0 | 0 | 0 | 0 |
| 1 | 0 | 0 | 1 | 1 | 0 | 0 | 0 |
| 0 | 0 | 0 | 1 | 0 | 0 | 1 | 0 |
| 0 | 1 | 0 | 1 | 1 | 0 | 0 | 0 |
| 0 | 1 | 1 | 1 | 0 | 0 | 0 | 0 |
| 0 | 1 | 0 | 1 | 0 | 0 | 0 | 1 |
| 0 | 0 | 0 | 1 | 1 | 0 | 0 | 0 |
| 0 | 1 | 0 | 1 | 0 | 0 | 0 | 0 |
| 0 | 0 | 0 | 1 | 0 | 0 | 1 | 1 |
| 0 | 0 | 0 | 1 | 1 | 0 | 0 | 0 |
| 0 | 0 | 0 | 1 | 0 | 0 | 0 | 0 |
| 0 | 1 | 0 | 1 | 1 | 0 | 1 | 0 |
| 0 | 1 | 0 | 1 | 0 | 0 | 1 | 0 |
| 1 | 0 | 0 | 1 | 0 | 0 | 0 | 0 |
| 0 | 0 | 0 | 1 | 1 | 0 | 1 | 1 |
| 0 | 1 | 1 | 1 | 0 | 0 | 1 | 0 |
| 0 | 0 | 1 | 1 | 0 | 0 | 0 | 0 |
| 0 | 0 | 0 | 1 | 1 | 0 | 0 | 0 |
| 1 | 0 | 0 | 1 | 1 | 0 | 1 | 0 |

|   |   |   |   |   |   |   |   |
|---|---|---|---|---|---|---|---|
| 0 | 1 | 0 | 0 | 1 | 0 | 1 | 0 |
| 0 | 0 | 0 | 1 | 0 | 0 | 0 | 0 |
| 1 | 0 | 0 | 1 | 1 | 0 | 0 | 0 |
| 0 | 0 | 0 | 1 | 0 | 0 | 0 | 0 |
| 1 | 1 | 0 | 1 | 1 | 0 | 0 | 0 |
| 0 | 1 | 0 | 1 | 1 | 0 | 1 | 0 |
| 1 | 0 | 1 | 1 | 1 | 0 | 0 | 0 |
| 0 | 0 | 0 | 1 | 1 | 0 | 0 | 0 |
| 0 | 0 | 0 | 1 | 0 | 0 | 0 | 0 |
| 0 | 1 | 0 | 1 | 1 | 0 | 1 | 0 |
| 0 | 0 | 0 | 0 | 1 | 0 | 1 | 0 |
| 1 | 1 | 0 | 1 | 0 | 0 | 0 | 0 |
| 0 | 1 | 0 | 1 | 1 | 0 | 1 | 0 |
| 0 | 1 | 0 | 1 | 1 | 0 | 0 | 0 |
| 1 | 0 | 1 | 1 | 1 | 0 | 0 | 0 |
| 1 | 0 | 0 | 1 | 1 | 0 | 0 | 0 |
| 0 | 0 | 0 | 1 | 1 | 0 | 1 | 1 |
| 0 | 1 | 1 | 1 | 1 | 0 | 1 | 0 |
| 0 | 0 | 0 | 1 | 1 | 0 | 1 | 1 |
| 1 | 0 | 0 | 1 | 1 | 0 | 1 | 1 |
| 1 | 0 | 0 | 1 | 1 | 0 | 1 | 1 |
| 0 | 0 | 1 | 1 | 1 | 0 | 1 | 1 |
| 0 | 1 | 0 | 1 | 1 | 0 | 0 | 0 |
| 0 | 1 | 0 | 1 | 1 | 0 | 0 | 1 |
| 0 | 0 | 0 | 1 | 1 | 0 | 1 | 1 |
| 1 | 0 | 0 | 1 | 1 | 0 | 0 | 0 |
| 0 | 0 | 0 | 1 | 0 | 0 | 0 | 1 |
| 0 | 0 | 0 | 1 | 0 | 0 | 1 | 0 |
| 1 | 0 | 0 | 1 | 0 | 0 | 0 | 0 |
| 1 | 0 | 0 | 1 | 1 | 0 | 0 | 0 |
| 0 | 0 | 0 | 1 | 1 | 0 | 0 | 0 |
| 0 | 1 | 0 | 1 | 1 | 0 | 0 | 0 |
| 0 | 0 | 0 | 1 | 1 | 0 | 1 | 0 |
| 0 | 0 | 0 | 1 | 1 | 0 | 1 | 0 |
| 1 | 0 | 1 | 1 | 1 | 0 | 0 | 0 |
| 1 | 0 | 1 | 1 | 1 | 0 | 1 | 0 |
| 0 | 0 | 0 | 1 | 1 | 0 | 0 | 0 |
| 0 | 0 | 0 | 1 | 1 | 0 | 1 | 0 |
| 1 | 0 | 0 | 1 | 1 | 0 | 1 | 0 |
| 0 | 1 | 1 | 1 | 0 | 0 | 0 | 0 |
| 0 | 0 | 0 | 1 | 1 | 0 | 0 | 0 |
| 1 | 0 | 0 | 1 | 1 | 0 | 1 | 0 |
| 0 | 0 | 0 | 1 | 1 | 0 | 1 | 0 |
| 0 | 0 | 0 | 1 | 1 | 0 | 1 | 0 |

|   |   |   |   |   |   |   |   |
|---|---|---|---|---|---|---|---|
| 0 | 1 | 0 | 1 | 0 | 0 | 0 | 0 |
| 1 | 0 | 0 | 1 | 0 | 0 | 0 | 0 |
| 0 | 1 | 0 | 1 | 1 | 0 | 0 | 0 |
| 1 | 0 | 0 | 1 | 0 | 0 | 0 | 0 |
| 0 | 0 | 0 | 1 | 0 | 0 | 0 | 0 |
| 1 | 0 | 0 | 1 | 0 | 0 | 0 | 0 |
| 0 | 0 | 0 | 1 | 0 | 0 | 0 | 0 |
| 0 | 1 | 1 | 1 | 1 | 0 | 1 | 1 |
| 1 | 1 | 0 | 1 | 0 | 0 | 0 | 0 |
| 1 | 0 | 0 | 1 | 1 | 0 | 0 | 0 |
| 1 | 0 | 1 | 1 | 1 | 0 | 0 | 0 |
| 0 | 0 | 0 | 1 | 0 | 0 | 0 | 0 |
| 1 | 0 | 0 | 1 | 1 | 0 | 0 | 0 |
| 1 | 0 | 0 | 1 | 1 | 0 | 0 | 0 |
| 0 | 0 | 0 | 1 | 1 | 0 | 1 | 0 |
| 0 | 0 | 0 | 1 | 0 | 0 | 0 | 0 |
| 1 | 0 | 0 | 1 | 1 | 0 | 0 | 0 |
| 0 | 0 | 0 | 0 | 1 | 0 | 1 | 0 |
| 0 | 1 | 0 | 1 | 1 | 0 | 0 | 0 |
| 1 | 0 | 0 | 1 | 1 | 0 | 0 | 0 |
| 1 | 1 | 0 | 1 | 1 | 0 | 0 | 0 |
| 0 | 1 | 0 | 1 | 1 | 0 | 1 | 0 |
| 1 | 0 | 0 | 1 | 0 | 0 | 0 | 0 |
| 0 | 1 | 0 | 1 | 1 | 0 | 1 | 1 |
| 0 | 0 | 0 | 1 | 1 | 0 | 1 | 1 |
| 1 | 0 | 1 | 1 | 1 | 0 | 0 | 0 |
| 1 | 1 | 0 | 1 | 1 | 0 | 1 | 0 |
| 0 | 1 | 0 | 1 | 1 | 0 | 1 | 1 |
| 0 | 1 | 1 | 1 | 1 | 0 | 1 | 1 |
| 0 | 1 | 0 | 1 | 1 | 0 | 0 | 1 |
| 0 | 1 | 1 | 1 | 1 | 0 | 0 | 1 |
| 1 | 1 | 1 | 1 | 1 | 0 | 0 | 0 |
| 1 | 1 | 0 | 1 | 1 | 0 | 1 | 1 |
| 0 | 1 | 0 | 1 | 1 | 0 | 1 | 1 |
| 0 | 1 | 0 | 1 | 1 | 0 | 1 | 1 |
| 0 | 0 | 0 | 1 | 1 | 0 | 1 | 1 |
| 1 | 0 | 1 | 1 | 1 | 0 | 1 | 1 |
| 0 | 1 | 0 | 1 | 1 | 0 | 1 | 1 |
| 1 | 1 | 1 | 1 | 1 | 0 | 1 | 1 |
| 1 | 1 | 0 | 1 | 1 | 0 | 1 | 1 |
| 0 | 1 | 0 | 1 | 1 | 0 | 1 | 1 |
| 0 | 0 | 0 | 1 | 1 | 0 | 1 | 1 |
| 1 | 0 | 1 | 1 | 1 | 0 | 1 | 1 |

|   |   |   |   |   |   |   |   |
|---|---|---|---|---|---|---|---|
| 0 | 0 | 0 | 1 | 1 | 0 | 0 | 0 |
| 1 | 0 | 0 | 1 | 0 | 0 | 1 | 1 |
| 1 | 0 | 0 | 1 | 0 | 0 | 0 | 1 |
| 0 | 0 | 0 | 1 | 1 | 0 | 1 | 1 |
| 1 | 0 | 0 | 1 | 1 | 0 | 1 | 0 |
| 0 | 1 | 0 | 1 | 0 | 0 | 0 | 1 |
| 1 | 0 | 0 | 1 | 0 | 0 | 1 | 0 |
| 0 | 1 | 1 | 1 | 0 | 0 | 0 | 1 |
| 0 | 1 | 0 | 1 | 1 | 0 | 0 | 0 |
| 1 | 0 | 1 | 1 | 1 | 0 | 1 | 1 |
| 0 | 0 | 0 | 1 | 1 | 0 | 1 | 1 |
| 0 | 1 | 1 | 1 | 1 | 0 | 0 | 0 |
| 0 | 1 | 0 | 1 | 1 | 0 | 1 | 1 |
| 0 | 0 | 0 | 1 | 1 | 0 | 1 | 0 |
| 1 | 0 | 1 | 1 | 1 | 0 | 1 | 0 |
| 1 | 0 | 0 | 1 | 1 | 0 | 1 | 0 |
| 0 | 1 | 0 | 1 | 0 | 0 | 1 | 0 |
| 0 | 1 | 0 | 1 | 1 | 0 | 1 | 0 |
| 1 | 0 | 1 | 1 | 1 | 0 | 1 | 0 |
| 0 | 0 | 0 | 1 | 1 | 0 | 0 | 1 |
| 0 | 1 | 1 | 1 | 0 | 0 | 0 | 0 |
| 0 | 1 | 0 | 1 | 1 | 0 | 1 | 0 |
| 0 | 1 | 0 | 1 | 0 | 0 | 1 | 0 |
| 0 | 1 | 0 | 1 | 0 | 0 | 0 | 1 |
| 0 | 0 | 1 | 1 | 1 | 0 | 1 | 0 |
| 0 | 1 | 0 | 1 | 1 | 0 | 0 | 0 |
| 0 | 1 | 0 | 1 | 0 | 0 | 0 | 0 |
| 0 | 0 | 0 | 1 | 0 | 0 | 1 | 0 |
| 1 | 0 | 0 | 1 | 1 | 0 | 1 | 1 |
| 0 | 0 | 0 | 1 | 1 | 0 | 1 | 0 |
| 0 | 1 | 0 | 1 | 0 | 0 | 1 | 0 |
| 0 | 0 | 0 | 1 | 0 | 0 | 0 | 0 |
| 0 | 1 | 0 | 1 | 0 | 0 | 0 | 1 |
| 0 | 1 | 0 | 1 | 0 | 0 | 1 | 1 |
| 0 | 0 | 0 | 1 | 0 | 0 | 0 | 0 |
| 1 | 1 | 0 | 1 | 0 | 0 | 0 | 0 |
| 0 | 1 | 0 | 1 | 1 | 0 | 0 | 0 |
| 1 | 0 | 0 | 1 | 1 | 0 | 0 | 0 |
| 0 | 1 | 1 | 1 | 0 | 0 | 0 | 0 |

|   |   |   |   |   |   |   |   |
|---|---|---|---|---|---|---|---|
| 0 | 0 | 0 | 1 | 0 | 0 | 0 | 1 |
| 0 | 1 | 0 | 1 | 0 | 0 | 1 | 0 |
| 1 | 0 | 0 | 1 | 0 | 0 | 0 | 0 |
| 0 | 0 | 0 | 1 | 1 | 0 | 1 | 0 |
| 1 | 0 | 1 | 0 | 1 | 0 | 1 | 0 |
| 0 | 0 | 0 | 0 | 1 | 0 | 0 | 0 |
| 0 | 0 | 0 | 1 | 1 | 0 | 0 | 0 |
| 0 | 0 | 0 | 0 | 1 | 0 | 0 | 0 |
| 0 | 0 | 0 | 0 | 1 | 0 | 0 | 0 |
| 1 | 0 | 0 | 1 | 1 | 0 | 0 | 0 |
| 0 | 0 | 0 | 1 | 0 | 0 | 0 | 0 |
| 0 | 1 | 0 | 1 | 1 | 0 | 0 | 0 |
| 0 | 0 | 0 | 1 | 0 | 0 | 0 | 0 |
| 1 | 0 | 0 | 1 | 0 | 0 | 0 | 0 |
| 0 | 1 | 0 | 1 | 1 | 0 | 1 | 1 |
| 1 | 1 | 0 | 1 | 0 | 0 | 1 | 0 |
| 0 | 1 | 0 | 1 | 0 | 0 | 1 | 0 |
| 0 | 1 | 0 | 0 | 1 | 0 | 0 | 0 |
| 0 | 0 | 0 | 1 | 0 | 0 | 0 | 0 |
| 1 | 0 | 0 | 1 | 1 | 0 | 0 | 0 |
| 0 | 0 | 0 | 1 | 1 | 0 | 0 | 0 |
| 1 | 0 | 0 | 1 | 0 | 0 | 0 | 0 |
| 1 | 0 | 0 | 1 | 1 | 0 | 0 | 0 |
| 1 | 0 | 0 | 1 | 1 | 0 | 0 | 0 |
| 1 | 0 | 0 | 1 | 1 | 0 | 0 | 0 |
| 1 | 0 | 0 | 1 | 1 | 0 | 0 | 0 |
| 1 | 0 | 0 | 1 | 1 | 0 | 0 | 0 |
| 1 | 0 | 0 | 1 | 1 | 0 | 0 | 0 |
| 1 | 0 | 0 | 1 | 0 | 0 | 0 | 0 |
| 0 | 0 | 1 | 1 | 1 | 0 | 0 | 0 |
| 1 | 0 | 0 | 1 | 1 | 0 | 0 | 0 |
| 1 | 0 | 0 | 1 | 1 | 0 | 0 | 0 |
| 1 | 0 | 0 | 1 | 1 | 0 | 0 | 1 |
| 1 | 0 | 0 | 1 | 1 | 0 | 0 | 0 |
| 0 | 0 | 0 | 1 | 1 | 0 | 0 | 0 |
| 1 | 0 | 0 | 1 | 1 | 0 | 1 | 0 |
| 1 | 0 | 0 | 1 | 0 | 0 | 0 | 0 |
| 0 | 0 | 0 | 1 | 1 | 0 | 0 | 0 |
| 0 | 0 | 0 | 1 | 0 | 0 | 0 | 0 |
| 1 | 0 | 0 | 1 | 1 | 0 | 0 | 0 |
| 1 | 0 | 0 | 1 | 0 | 0 | 0 | 0 |
| 0 | 1 | 1 | 1 | 1 | 0 | 0 | 1 |
| 0 | 0 | 0 | 1 | 1 | 0 | 0 | 0 |
| 1 | 1 | 1 | 1 | 1 | 0 | 0 | 0 |
| 1 | 0 | 0 | 1 | 1 | 0 | 0 | 0 |
| 0 | 0 | 0 | 1 | 0 | 0 | 0 | 0 |
| 1 | 0 | 0 | 1 | 1 | 0 | 0 | 0 |
| 1 | 0 | 0 | 1 | 0 | 0 | 0 | 0 |

|   |   |   |   |   |   |   |   |
|---|---|---|---|---|---|---|---|
| 0 | 0 | 0 | 1 | 1 | 0 | 0 | 0 |
| 0 | 1 | 1 | 1 | 1 | 0 | 0 | 1 |
| 1 | 0 | 0 | 1 | 1 | 0 | 0 | 0 |
| 1 | 0 | 0 | 1 | 0 | 0 | 0 | 0 |
| 0 | 0 | 1 | 1 | 1 | 0 | 0 | 0 |
| 0 | 1 | 0 | 1 | 1 | 0 | 1 | 0 |
| 0 | 0 | 0 | 1 | 0 | 0 | 0 | 1 |
| 1 | 0 | 0 | 1 | 1 | 0 | 0 | 0 |
| 0 | 1 | 0 | 1 | 1 | 0 | 0 | 0 |
| 1 | 0 | 0 | 1 | 0 | 0 | 0 | 0 |
| 0 | 0 | 0 | 1 | 0 | 0 | 0 | 0 |
| 1 | 0 | 0 | 1 | 0 | 0 | 0 | 0 |
| 0 | 0 | 0 | 1 | 0 | 0 | 1 | 1 |
| 1 | 0 | 0 | 1 | 1 | 0 | 0 | 0 |
| 1 | 1 | 0 | 1 | 1 | 0 | 0 | 1 |
| 1 | 1 | 0 | 1 | 1 | 1 | 0 | 0 |
| 1 | 0 | 0 | 1 | 1 | 0 | 1 | 0 |
| 1 | 0 | 1 | 1 | 1 | 0 | 0 | 1 |
| 0 | 1 | 1 | 1 | 1 | 0 | 0 | 1 |
| 0 | 0 | 0 | 1 | 1 | 0 | 0 | 0 |
| 0 | 0 | 0 | 1 | 1 | 0 | 0 | 1 |
| 0 | 1 | 1 | 1 | 1 | 0 | 0 | 0 |
| 0 | 0 | 0 | 1 | 1 | 0 | 0 | 1 |
| 1 | 0 | 1 | 1 | 1 | 0 | 0 | 0 |
| 1 | 1 | 1 | 1 | 0 | 0 | 0 | 1 |
| 1 | 0 | 0 | 1 | 1 | 0 | 0 | 0 |
| 1 | 1 | 1 | 1 | 1 | 0 | 1 | 1 |
| 0 | 1 | 0 | 1 | 1 | 0 | 0 | 0 |
| 1 | 0 | 0 | 1 | 1 | 0 | 0 | 0 |
| 0 | 1 | 1 | 1 | 1 | 0 | 0 | 0 |
| 1 | 0 | 0 | 1 | 1 | 0 | 0 | 0 |
| 0 | 1 | 1 | 1 | 1 | 0 | 0 | 1 |
| 0 | 0 | 0 | 1 | 1 | 0 | 1 | 0 |
| 0 | 0 | 0 | 0 | 1 | 0 | 0 | 1 |
| 1 | 1 | 0 | 1 | 0 | 0 | 0 | 0 |
| 1 | 0 | 1 | 1 | 1 | 0 | 1 | 0 |
| 1 | 0 | 0 | 1 | 0 | 0 | 1 | 0 |
| 1 | 0 | 1 | 1 | 1 | 0 | 0 | 1 |
| 0 | 1 | 0 | 1 | 1 | 0 | 0 | 1 |
| 1 | 1 | 0 | 1 | 1 | 0 | 0 | 0 |
| 1 | 1 | 1 | 1 | 1 | 0 | 0 | 1 |
| 1 | 0 | 1 | 1 | 1 | 0 | 0 | 1 |
| 1 | 0 | 0 | 1 | 1 | 0 | 0 | 1 |
| 0 | 0 | 0 | 1 | 1 | 0 | 0 | 0 |
| 1 | 0 | 0 | 1 | 1 | 0 | 1 | 1 |
| 1 | 1 | 1 | 1 | 1 | 0 | 0 | 1 |
| 0 | 0 | 0 | 1 | 1 | 0 | 0 | 1 |
| 1 | 0 | 0 | 1 | 1 | 0 | 0 | 1 |
| 1 | 1 | 1 | 1 | 1 | 0 | 0 | 1 |



|   |   |   |   |   |   |   |   |
|---|---|---|---|---|---|---|---|
| 0 | 0 | 0 | 1 | 1 | 0 | 0 | 1 |
| 1 | 0 | 1 | 1 | 1 | 0 | 0 | 1 |
| 0 | 0 | 0 | 1 | 0 | 0 | 0 | 1 |
| 1 | 1 | 1 | 1 | 1 | 0 | 0 | 0 |
| 1 | 0 | 0 | 1 | 1 | 0 | 1 | 1 |
| 1 | 0 | 0 | 1 | 1 | 0 | 0 | 1 |
| 1 | 0 | 0 | 1 | 1 | 0 | 0 | 0 |
| 1 | 1 | 0 | 1 | 1 | 0 | 0 | 0 |
| 1 | 1 | 1 | 1 | 1 | 0 | 0 | 0 |
| 0 | 0 | 0 | 1 | 1 | 0 | 1 | 1 |
| 1 | 0 | 0 | 1 | 1 | 0 | 1 | 1 |
| 1 | 1 | 0 | 1 | 1 | 0 | 0 | 0 |
| 0 | 0 | 0 | 1 | 0 | 0 | 1 | 1 |
| 0 | 0 | 1 | 1 | 1 | 0 | 0 | 1 |
| 1 | 0 | 0 | 1 | 1 | 0 | 0 | 1 |
| 1 | 0 | 1 | 1 | 1 | 1 | 1 | 0 |
| 1 | 1 | 1 | 1 | 1 | 0 | 0 | 1 |
| 1 | 0 | 0 | 1 | 1 | 0 | 0 | 0 |
| 1 | 0 | 0 | 1 | 1 | 0 | 0 | 1 |
| 0 | 0 | 0 | 1 | 0 | 0 | 0 | 1 |
| 0 | 1 | 0 | 1 | 1 | 0 | 1 | 1 |
| 1 | 0 | 0 | 1 | 1 | 0 | 0 | 1 |
| 0 | 0 | 0 | 1 | 1 | 0 | 0 | 0 |
| 1 | 0 | 0 | 1 | 1 | 0 | 0 | 0 |
| 1 | 0 | 1 | 1 | 1 | 0 | 0 | 1 |
| 1 | 0 | 0 | 1 | 1 | 0 | 0 | 0 |
| 0 | 0 | 0 | 1 | 1 | 0 | 1 | 1 |
| 1 | 0 | 0 | 1 | 1 | 0 | 0 | 0 |
| 1 | 1 | 0 | 1 | 1 | 0 | 1 | 1 |
| 0 | 0 | 0 | 1 | 1 | 0 | 0 | 1 |
| 1 | 1 | 1 | 1 | 1 | 1 | 0 | 0 |
| 0 | 0 | 0 | 1 | 1 | 0 | 0 | 0 |
| 1 | 0 | 0 | 1 | 1 | 0 | 1 | 0 |
| 0 | 0 | 1 | 1 | 1 | 0 | 0 | 0 |
| 1 | 0 | 0 | 1 | 1 | 0 | 1 | 1 |
| 1 | 0 | 0 | 0 | 1 | 0 | 0 | 0 |
| 1 | 0 | 0 | 1 | 1 | 0 | 0 | 0 |
| 1 | 0 | 1 | 1 | 1 | 0 | 0 | 0 |
| 0 | 0 | 0 | 1 | 0 | 0 | 0 | 0 |
| 0 | 0 | 1 | 1 | 0 | 0 | 0 | 0 |
| 1 | 0 | 0 | 1 | 1 | 1 | 0 | 0 |
| 1 | 0 | 0 | 1 | 1 | 0 | 0 | 0 |
| 1 | 0 | 0 | 1 | 1 | 1 | 0 | 0 |
| 1 | 0 | 0 | 1 | 0 | 0 | 0 | 0 |
| 1 | 0 | 0 | 1 | 1 | 0 | 1 | 0 |
| 1 | 0 | 0 | 1 | 1 | 0 | 0 | 0 |

|   |   |   |   |   |   |   |   |
|---|---|---|---|---|---|---|---|
| 1 | 1 | 1 | 1 | 1 | 0 | 0 | 0 |
| 1 | 1 | 0 | 1 | 1 | 0 | 0 | 0 |
| 0 | 0 | 0 | 0 | 1 | 0 | 1 | 0 |
| 1 | 0 | 0 | 0 | 1 | 1 | 1 | 0 |
| 1 | 0 | 0 | 1 | 1 | 0 | 0 | 0 |
| 0 | 1 | 0 | 1 | 0 | 1 | 0 | 0 |
| 1 | 0 | 0 | 1 | 1 | 0 | 0 | 0 |
| 1 | 0 | 0 | 0 | 1 | 1 | 0 | 0 |
| 1 | 0 | 0 | 0 | 1 | 1 | 0 | 0 |
| 1 | 0 | 0 | 0 | 1 | 1 | 0 | 0 |
| 0 | 0 | 0 | 1 | 0 | 0 | 0 | 0 |
| 1 | 0 | 0 | 1 | 1 | 0 | 0 | 0 |
| 1 | 0 | 0 | 1 | 1 | 0 | 0 | 0 |
| 1 | 0 | 0 | 0 | 1 | 1 | 0 | 0 |
| 1 | 0 | 1 | 1 | 1 | 0 | 0 | 0 |
| 1 | 0 | 0 | 1 | 1 | 0 | 0 | 0 |
| 1 | 0 | 0 | 0 | 1 | 1 | 0 | 0 |
| 0 | 0 | 0 | 1 | 1 | 0 | 0 | 0 |
| 1 | 0 | 0 | 1 | 1 | 1 | 0 | 0 |
| 1 | 0 | 0 | 0 | 1 | 0 | 0 | 0 |
| 0 | 0 | 0 | 1 | 1 | 1 | 0 | 0 |
| 0 | 0 | 0 | 1 | 0 | 0 | 0 | 0 |
| 0 | 0 | 0 | 1 | 1 | 0 | 0 | 1 |
| 1 | 1 | 1 | 1 | 1 | 1 | 0 | 1 |
| 0 | 1 | 1 | 1 | 1 | 0 | 1 | 1 |
| 0 | 1 | 1 | 1 | 1 | 0 | 1 | 1 |
| 1 | 0 | 1 | 1 | 1 | 0 | 0 | 0 |
| 1 | 0 | 0 | 1 | 1 | 0 | 0 | 0 |
| 1 | 0 | 1 | 1 | 1 | 1 | 0 | 0 |
| 1 | 0 | 0 | 1 | 0 | 0 | 0 | 1 |
| 0 | 0 | 1 | 1 | 1 | 0 | 0 | 1 |
| 1 | 0 | 1 | 1 | 1 | 0 | 1 | 0 |
| 1 | 0 | 1 | 1 | 1 | 0 | 0 | 0 |
| 1 | 0 | 0 | 1 | 1 | 0 | 1 | 1 |
| 0 | 0 | 0 | 0 | 1 | 0 | 0 | 1 |
| 1 | 0 | 0 | 0 | 1 | 0 | 0 | 0 |
| 0 | 0 | 0 | 1 | 1 | 0 | 0 | 1 |
| 1 | 0 | 0 | 1 | 1 | 0 | 1 | 0 |
| 0 | 0 | 0 | 1 | 1 | 0 | 0 | 0 |
| 0 | 0 | 0 | 1 | 1 | 0 | 1 | 1 |
| 1 | 1 | 0 | 1 | 1 | 0 | 1 | 1 |
| 1 | 0 | 0 | 1 | 1 | 0 | 0 | 1 |
| 0 | 1 | 0 | 1 | 0 | 0 | 0 | 0 |



|   |   |   |   |   |   |   |   |
|---|---|---|---|---|---|---|---|
| 0 | 1 | 0 | 1 | 1 | 0 | 0 | 1 |
| 0 | 1 | 0 | 1 | 1 | 0 | 0 | 0 |
| 1 | 0 | 0 | 1 | 1 | 0 | 0 | 0 |
| 0 | 1 | 0 | 1 | 0 | 0 | 1 | 0 |
| 0 | 0 | 0 | 1 | 1 | 0 | 0 | 1 |
| 0 | 1 | 0 | 1 | 1 | 0 | 1 | 0 |
| 0 | 0 | 0 | 1 | 1 | 0 | 1 | 0 |
| 0 | 1 | 0 | 1 | 0 | 0 | 0 | 1 |
| 0 | 1 | 0 | 0 | 1 | 0 | 1 | 0 |
| 0 | 0 | 0 | 1 | 1 | 0 | 1 | 0 |
| 0 | 1 | 1 | 0 | 1 | 0 | 1 | 0 |
| 0 | 0 | 0 | 1 | 1 | 0 | 0 | 0 |
| 0 | 0 | 0 | 1 | 1 | 0 | 1 | 0 |
| 1 | 0 | 0 | 1 | 0 | 0 | 0 | 0 |
| 0 | 1 | 0 | 1 | 0 | 0 | 0 | 1 |
| 0 | 0 | 0 | 1 | 1 | 0 | 0 | 0 |
| 0 | 0 | 0 | 0 | 1 | 0 | 1 | 0 |
| 1 | 0 | 0 | 1 | 1 | 0 | 0 | 1 |
| 0 | 0 | 0 | 1 | 0 | 0 | 0 | 0 |
| 0 | 0 | 0 | 1 | 1 | 0 | 1 | 0 |
| 1 | 1 | 0 | 1 | 1 | 0 | 1 | 0 |
| 1 | 0 | 1 | 1 | 1 | 0 | 1 | 1 |
| 0 | 0 | 1 | 1 | 1 | 0 | 0 | 0 |
| 1 | 0 | 0 | 1 | 1 | 0 | 1 | 1 |
| 0 | 0 | 0 | 1 | 1 | 0 | 1 | 1 |
| 0 | 1 | 0 | 1 | 0 | 0 | 0 | 0 |
| 1 | 0 | 1 | 1 | 1 | 0 | 0 | 0 |
| 0 | 0 | 0 | 1 | 1 | 0 | 1 | 0 |
| 0 | 1 | 1 | 1 | 1 | 0 | 1 | 1 |
| 1 | 1 | 0 | 1 | 0 | 0 | 1 | 1 |
| 0 | 1 | 0 | 1 | 1 | 0 | 1 | 1 |
| 0 | 1 | 0 | 1 | 1 | 0 | 1 | 1 |
| 0 | 1 | 0 | 1 | 0 | 0 | 1 | 1 |
| 1 | 0 | 0 | 1 | 1 | 0 | 1 | 1 |
| 0 | 1 | 0 | 1 | 1 | 0 | 1 | 0 |
| 1 | 1 | 1 | 1 | 0 | 0 | 1 | 0 |
| 0 | 1 | 0 | 1 | 1 | 0 | 1 | 0 |
| 0 | 1 | 0 | 1 | 0 | 0 | 1 | 0 |
| 0 | 1 | 0 | 1 | 1 | 1 | 1 | 0 |
| 0 | 0 | 0 | 1 | 1 | 0 | 1 | 1 |
| 0 | 1 | 0 | 1 | 1 | 0 | 1 | 0 |
| 0 | 0 | 0 | 1 | 1 | 0 | 1 | 1 |

|   |   |   |   |   |   |   |   |
|---|---|---|---|---|---|---|---|
| 1 | 1 | 0 | 1 | 1 | 0 | 1 | 0 |
| 0 | 0 | 1 | 1 | 1 | 0 | 1 | 0 |
| 0 | 1 | 0 | 1 | 1 | 0 | 1 | 0 |
| 0 | 1 | 0 | 1 | 1 | 0 | 1 | 0 |
| 0 | 0 | 1 | 1 | 1 | 0 | 0 | 0 |
| 0 | 1 | 0 | 1 | 0 | 0 | 1 | 1 |
| 0 | 1 | 0 | 0 | 0 | 0 | 1 | 0 |
| 0 | 0 | 0 | 1 | 1 | 0 | 1 | 0 |
| 0 | 1 | 0 | 1 | 1 | 0 | 0 | 0 |
| 0 | 1 | 0 | 0 | 1 | 0 | 1 | 0 |
| 1 | 0 | 0 | 1 | 0 | 0 | 0 | 0 |
| 0 | 1 | 0 | 1 | 0 | 0 | 1 | 0 |
| 0 | 1 | 0 | 0 | 1 | 0 | 1 | 0 |
| 0 | 0 | 1 | 0 | 1 | 0 | 0 | 0 |
| 0 | 0 | 0 | 1 | 1 | 0 | 1 | 1 |
| 0 | 1 | 0 | 1 | 1 | 0 | 0 | 0 |
| 0 | 1 | 0 | 1 | 1 | 0 | 1 | 0 |
| 1 | 1 | 0 | 1 | 0 | 0 | 0 | 0 |
| 0 | 1 | 0 | 1 | 0 | 0 | 0 | 0 |
| 0 | 1 | 0 | 1 | 0 | 0 | 0 | 0 |
| 1 | 1 | 0 | 1 | 1 | 0 | 0 | 1 |
| 1 | 1 | 0 | 1 | 0 | 0 | 0 | 0 |
| 1 | 0 | 0 | 1 | 1 | 0 | 1 | 0 |
| 0 | 1 | 0 | 1 | 0 | 0 | 1 | 0 |
| 0 | 1 | 0 | 1 | 1 | 0 | 0 | 1 |
| 1 | 0 | 0 | 1 | 1 | 0 | 0 | 0 |
| 0 | 0 | 1 | 1 | 0 | 0 | 0 | 0 |
| 0 | 0 | 0 | 1 | 1 | 0 | 1 | 1 |
| 0 | 0 | 0 | 1 | 1 | 0 | 1 | 1 |
| 1 | 0 | 0 | 1 | 1 | 0 | 1 | 0 |
| 0 | 0 | 0 | 1 | 1 | 0 | 0 | 1 |
| 1 | 0 | 0 | 1 | 1 | 0 | 1 | 0 |
| 1 | 0 | 0 | 1 | 1 | 0 | 1 | 0 |
| 1 | 1 | 1 | 1 | 1 | 0 | 1 | 0 |
| 1 | 0 | 0 | 1 | 1 | 0 | 0 | 0 |
| 0 | 1 | 1 | 1 | 1 | 0 | 0 | 1 |
| 0 | 0 | 0 | 1 | 1 | 0 | 1 | 1 |
| 0 | 0 | 1 | 1 | 1 | 0 | 1 | 1 |
| 0 | 0 | 1 | 1 | 0 | 0 | 0 | 1 |
| 0 | 0 | 0 | 1 | 0 | 0 | 0 | 0 |
| 0 | 0 | 0 | 1 | 0 | 0 | 1 | 0 |
| 0 | 0 | 0 | 1 | 1 | 0 | 1 | 0 |
| 1 | 0 | 0 | 1 | 1 | 0 | 1 | 0 |
| 0 | 0 | 0 | 1 | 1 | 0 | 0 | 1 |

|   |   |   |   |   |   |   |   |
|---|---|---|---|---|---|---|---|
| 0 | 1 | 0 | 1 | 1 | 0 | 1 | 0 |
| 0 | 0 | 1 | 1 | 1 | 0 | 1 | 0 |
| 1 | 0 | 0 | 1 | 1 | 0 | 1 | 0 |
| 0 | 0 | 0 | 1 | 1 | 0 | 1 | 0 |
| 0 | 1 | 0 | 1 | 1 | 0 | 0 | 0 |
| 0 | 0 | 0 | 0 | 1 | 0 | 1 | 0 |
| 0 | 1 | 0 | 1 | 0 | 0 | 0 | 0 |
| 0 | 1 | 0 | 1 | 0 | 0 | 1 | 0 |
| 0 | 0 | 0 | 1 | 1 | 0 | 0 | 0 |
| 1 | 0 | 0 | 1 | 1 | 0 | 0 | 0 |
| 1 | 0 | 0 | 1 | 1 | 0 | 1 | 0 |
| 1 | 0 | 1 | 1 | 1 | 0 | 1 | 0 |
| 0 | 1 | 0 | 1 | 1 | 0 | 0 | 0 |
| 1 | 0 | 0 | 1 | 1 | 0 | 0 | 0 |
| 0 | 1 | 0 | 1 | 1 | 0 | 0 | 0 |
| 1 | 0 | 0 | 0 | 1 | 0 | 1 | 0 |
| 0 | 1 | 0 | 0 | 1 | 0 | 0 | 0 |
| 1 | 0 | 0 | 0 | 1 | 0 | 0 | 0 |
| 0 | 0 | 0 | 1 | 0 | 0 | 1 | 0 |
| 1 | 0 | 0 | 1 | 1 | 0 | 0 | 0 |
| 0 | 1 | 0 | 1 | 1 | 0 | 1 | 0 |
| 1 | 0 | 0 | 1 | 1 | 0 | 0 | 0 |
| 0 | 0 | 0 | 1 | 1 | 0 | 1 | 0 |
| 0 | 0 | 0 | 1 | 1 | 0 | 1 | 1 |
| 1 | 0 | 0 | 1 | 0 | 0 | 1 | 0 |
| 0 | 1 | 1 | 1 | 1 | 0 | 1 | 1 |
| 1 | 1 | 0 | 1 | 1 | 0 | 1 | 0 |
| 0 | 0 | 0 | 1 | 1 | 0 | 1 | 1 |
| 0 | 0 | 1 | 1 | 1 | 0 | 1 | 1 |
| 0 | 0 | 0 | 1 | 1 | 0 | 0 | 0 |
| 1 | 0 | 1 | 1 | 0 | 0 | 0 | 0 |
| 1 | 1 | 0 | 1 | 0 | 0 | 0 | 0 |
| 0 | 0 | 0 | 1 | 1 | 0 | 1 | 0 |
| 1 | 0 | 0 | 1 | 1 | 0 | 0 | 0 |
| 0 | 1 | 0 | 1 | 1 | 0 | 0 | 0 |
| 0 | 1 | 0 | 1 | 0 | 0 | 1 | 0 |
| 1 | 1 | 0 | 1 | 0 | 0 | 1 | 0 |
| 0 | 0 | 0 | 1 | 1 | 0 | 0 | 1 |
| 0 | 0 | 1 | 0 | 1 | 0 | 0 | 0 |
| 1 | 1 | 0 | 1 | 1 | 0 | 1 | 0 |

|   |   |   |   |   |   |   |   |
|---|---|---|---|---|---|---|---|
| 0 | 1 | 0 | 1 | 1 | 0 | 0 | 0 |
| 1 | 0 | 1 | 1 | 1 | 0 | 0 | 0 |
| 0 | 1 | 0 | 1 | 1 | 0 | 1 | 0 |
| 0 | 1 | 0 | 1 | 0 | 0 | 0 | 0 |
| 0 | 1 | 0 | 1 | 0 | 0 | 0 | 1 |
| 0 | 0 | 0 | 1 | 1 | 0 | 1 | 0 |
| 0 | 1 | 0 | 1 | 1 | 0 | 0 | 0 |
| 1 | 0 | 0 | 1 | 0 | 0 | 1 | 0 |
| 0 | 0 | 0 | 1 | 1 | 0 | 0 | 0 |
| 1 | 0 | 0 | 1 | 0 | 0 | 1 | 0 |
| 0 | 0 | 0 | 1 | 0 | 0 | 0 | 0 |
| 0 | 0 | 0 | 1 | 1 | 0 | 0 | 0 |
| 1 | 1 | 0 | 1 | 1 | 0 | 0 | 0 |
| 1 | 1 | 1 | 1 | 1 | 0 | 0 | 0 |





|   |   |   |   |   |   |   |   |   |
|---|---|---|---|---|---|---|---|---|
| 0 | 0 | 0 | 0 | 0 | 0 | 0 | 0 | 0 |
| 1 | 0 | 0 | 1 | 0 | 0 | 0 | 0 | 0 |
| 0 | 0 | 0 | 0 | 0 | 0 | 0 | 0 | 0 |
| 0 | 0 | 0 | 1 | 0 | 0 | 0 | 0 | 0 |
| 1 | 1 | 0 | 0 | 0 | 0 | 0 | 0 | 0 |
| 0 | 0 | 1 | 0 | 0 | 0 | 0 | 0 | 0 |
| 0 | 0 | 0 | 1 | 0 | 0 | 0 | 0 | 0 |
| 0 | 0 | 0 | 1 | 0 | 0 | 0 | 0 | 0 |
| 0 | 0 | 0 | 0 | 0 | 0 | 0 | 0 | 0 |
| 0 | 0 | 0 | 1 | 0 | 0 | 0 | 0 | 0 |
| 1 | 0 | 0 | 0 | 0 | 0 | 0 | 0 | 0 |
| 0 | 0 | 0 | 1 | 0 | 0 | 0 | 0 | 0 |
| 0 | 0 | 0 | 0 | 0 | 0 | 0 | 0 | 0 |
| 0 | 1 | 1 | 0 | 0 | 0 | 0 | 0 | 0 |
| 0 | 0 | 0 | 0 | 0 | 0 | 0 | 0 | 0 |
| 1 | 0 | 0 | 0 | 0 | 0 | 0 | 0 | 0 |
| 1 | 0 | 0 | 1 | 0 | 0 | 0 | 0 | 0 |
| 0 | 0 | 0 | 0 | 0 | 0 | 0 | 0 | 0 |
| 0 | 0 | 0 | 0 | 0 | 0 | 0 | 0 | 0 |
| 0 | 1 | 0 | 0 | 0 | 0 | 0 | 0 | 0 |
| 0 | 1 | 1 | 0 | 0 | 0 | 0 | 0 | 0 |
| 0 | 0 | 0 | 0 | 0 | 0 | 0 | 0 | 0 |
| 0 | 0 | 0 | 1 | 0 | 0 | 0 | 0 | 0 |
| 0 | 0 | 0 | 1 | 0 | 0 | 0 | 0 | 0 |
| 0 | 0 | 0 | 1 | 0 | 0 | 0 | 0 | 0 |
| 0 | 0 | 0 | 1 | 0 | 0 | 0 | 0 | 0 |
| 0 | 0 | 0 | 1 | 0 | 0 | 0 | 0 | 0 |
| 0 | 1 | 0 | 1 | 0 | 0 | 0 | 0 | 0 |
| 0 | 0 | 0 | 1 | 0 | 0 | 0 | 0 | 0 |
| 0 | 1 | 0 | 1 | 0 | 0 | 0 | 0 | 0 |
| 0 | 1 | 1 | 0 | 0 | 0 | 0 | 0 | 0 |
| 0 | 0 | 1 | 1 | 0 | 0 | 0 | 0 | 0 |
| 0 | 0 | 0 | 1 | 0 | 0 | 0 | 0 | 0 |
| 0 | 0 | 0 | 1 | 0 | 0 | 0 | 0 | 0 |
| 0 | 0 | 0 | 1 | 0 | 0 | 0 | 0 | 0 |
| 0 | 0 | 0 | 1 | 0 | 0 | 0 | 0 | 0 |
| 0 | 0 | 0 | 1 | 0 | 0 | 0 | 0 | 0 |
| 0 | 0 | 0 | 1 | 0 | 0 | 0 | 0 | 0 |
| 1 | 0 | 0 | 0 | 0 | 0 | 0 | 0 | 0 |
| 0 | 0 | 0 | 0 | 0 | 0 | 0 | 0 | 0 |
| 0 | 0 | 0 | 0 | 0 | 0 | 0 | 0 | 0 |
| 0 | 0 | 0 | 0 | 0 | 0 | 0 | 0 | 0 |
| 0 | 1 | 1 | 1 | 0 | 0 | 0 | 0 | 0 |
| 0 | 0 | 0 | 0 | 0 | 0 | 0 | 0 | 0 |
| 1 | 0 | 0 | 0 | 0 | 0 | 0 | 0 | 0 |
| 0 | 0 | 0 | 1 | 0 | 0 | 0 | 0 | 0 |
| 0 | 0 | 0 | 1 | 0 | 0 | 0 | 0 | 0 |













|   |   |   |   |   |   |   |   |   |
|---|---|---|---|---|---|---|---|---|
| 0 | 0 | 0 | 1 | 0 | 0 | 0 | 0 | 0 |
| 0 | 1 | 1 | 0 | 1 | 0 | 0 | 0 | 0 |
| 0 | 0 | 0 | 1 | 0 | 0 | 0 | 0 | 0 |
| 1 | 0 | 0 | 1 | 0 | 0 | 0 | 0 | 0 |
| 0 | 0 | 0 | 1 | 0 | 0 | 0 | 0 | 0 |
| 1 | 1 | 1 | 1 | 0 | 0 | 0 | 0 | 0 |
| 0 | 0 | 0 | 1 | 0 | 0 | 0 | 0 | 0 |
| 1 | 1 | 0 | 0 | 0 | 0 | 0 | 0 | 0 |
| 0 | 0 | 0 | 1 | 0 | 0 | 0 | 0 | 0 |
| 0 | 0 | 1 | 1 | 0 | 0 | 0 | 1 | 1 |
| 1 | 1 | 1 | 0 | 0 | 0 | 0 | 0 | 1 |
| 1 | 0 | 0 | 1 | 0 | 0 | 0 | 0 | 0 |
| 1 | 1 | 0 | 0 | 0 | 0 | 0 | 1 | 0 |
| 0 | 0 | 0 | 1 | 0 | 0 | 0 | 0 | 0 |
| 1 | 1 | 1 | 1 | 0 | 0 | 0 | 0 | 0 |
| 0 | 0 | 0 | 1 | 0 | 0 | 0 | 0 | 0 |
| 0 | 0 | 0 | 1 | 0 | 0 | 0 | 0 | 0 |
| 1 | 1 | 0 | 0 | 0 | 0 | 0 | 0 | 0 |
| 0 | 0 | 0 | 0 | 0 | 0 | 0 | 0 | 0 |
| 0 | 0 | 0 | 1 | 0 | 0 | 0 | 0 | 0 |
| 1 | 1 | 0 | 0 | 0 | 0 | 0 | 0 | 0 |
| 0 | 0 | 0 | 0 | 0 | 0 | 0 | 0 | 0 |
| 0 | 0 | 0 | 1 | 0 | 0 | 0 | 0 | 0 |
| 0 | 1 | 0 | 1 | 0 | 0 | 0 | 0 | 0 |
| 1 | 1 | 0 | 1 | 0 | 0 | 0 | 0 | 0 |
| 1 | 0 | 0 | 1 | 0 | 0 | 0 | 0 | 1 |
| 0 | 0 | 0 | 0 | 0 | 0 | 0 | 0 | 0 |
| 0 | 1 | 0 | 0 | 0 | 0 | 0 | 0 | 0 |
| 0 | 0 | 0 | 0 | 0 | 0 | 0 | 0 | 0 |
| 0 | 0 | 0 | 0 | 0 | 0 | 0 | 0 | 0 |
| 0 | 0 | 0 | 0 | 0 | 0 | 0 | 0 | 0 |
| 0 | 0 | 0 | 0 | 0 | 0 | 0 | 1 | 0 |
| 0 | 0 | 0 | 1 | 0 | 0 | 0 | 0 | 0 |
| 0 | 0 | 0 | 0 | 0 | 0 | 0 | 0 | 0 |
| 1 | 0 | 0 | 0 | 0 | 0 | 0 | 0 | 0 |
| 0 | 0 | 0 | 0 | 0 | 0 | 0 | 0 | 0 |
| 0 | 0 | 0 | 0 | 0 | 0 | 0 | 0 | 0 |
| 1 | 0 | 0 | 0 | 0 | 0 | 0 | 0 | 0 |
| 1 | 0 | 0 | 1 | 0 | 0 | 0 | 0 | 1 |
| 0 | 0 | 0 | 1 | 0 | 0 | 0 | 0 | 0 |
| 1 | 0 | 0 | 1 | 0 | 1 | 0 | 0 | 0 |
| 0 | 0 | 0 | 0 | 0 | 0 | 0 | 0 | 0 |
| 1 | 0 | 0 | 0 | 0 | 0 | 0 | 0 | 0 |
| 0 | 0 | 0 | 1 | 0 | 0 | 0 | 0 | 0 |
| 0 | 0 | 0 | 0 | 0 | 0 | 0 | 0 | 0 |
| 0 | 0 | 0 | 0 | 0 | 0 | 0 | 0 | 0 |
| 0 | 0 | 0 | 0 | 0 | 0 | 0 | 0 | 0 |
| 0 | 0 | 0 | 1 | 0 | 0 | 0 | 0 | 0 |
| 0 | 0 | 0 | 0 | 0 | 0 | 0 | 0 | 0 |
| 0 | 0 | 0 | 0 | 0 | 0 | 0 | 0 | 0 |
| 0 | 0 | 0 | 1 | 0 | 0 | 0 | 0 | 0 |
| 0 | 0 | 0 | 0 | 0 | 0 | 0 | 0 | 0 |
| 0 | 0 | 0 | 0 | 0 | 0 | 0 | 0 | 0 |
| 0 | 0 | 0 | 1 | 0 | 0 | 0 | 0 | 0 |



|   |   |   |   |   |   |   |   |   |
|---|---|---|---|---|---|---|---|---|
| 0 | 0 | 0 | 0 | 0 | 0 | 0 | 0 | 0 |
| 0 | 0 | 0 | 0 | 0 | 0 | 0 | 0 | 0 |
| 0 | 0 | 0 | 0 | 0 | 0 | 0 | 0 | 0 |
| 0 | 0 | 0 | 0 | 0 | 0 | 0 | 0 | 0 |
| 0 | 0 | 0 | 0 | 0 | 0 | 0 | 0 | 0 |
| 0 | 0 | 0 | 0 | 0 | 0 | 0 | 1 | 0 |
| 0 | 1 | 1 | 0 | 0 | 0 | 0 | 0 | 0 |
| 0 | 0 | 0 | 1 | 0 | 0 | 0 | 0 | 0 |
| 0 | 0 | 0 | 0 | 0 | 0 | 0 | 0 | 0 |
| 0 | 1 | 0 | 1 | 0 | 0 | 0 | 0 | 0 |
| 0 | 0 | 0 | 1 | 0 | 0 | 0 | 0 | 0 |
| 0 | 0 | 0 | 0 | 0 | 0 | 0 | 0 | 0 |
| 0 | 0 | 0 | 1 | 0 | 0 | 0 | 0 | 0 |
| 0 | 0 | 0 | 1 | 0 | 0 | 0 | 0 | 0 |
| 0 | 1 | 0 | 0 | 0 | 0 | 0 | 0 | 0 |
| 0 | 0 | 0 | 1 | 0 | 0 | 0 | 0 | 0 |
| 0 | 0 | 0 | 0 | 0 | 0 | 0 | 0 | 0 |
| 1 | 1 | 1 | 0 | 0 | 0 | 0 | 0 | 0 |
| 1 | 0 | 0 | 1 | 0 | 0 | 0 | 0 | 1 |
| 1 | 0 | 0 | 1 | 0 | 0 | 0 | 0 | 0 |
| 0 | 0 | 0 | 1 | 0 | 0 | 1 | 0 | 0 |
| 0 | 0 | 0 | 1 | 0 | 0 | 0 | 0 | 0 |
| 0 | 0 | 0 | 1 | 0 | 0 | 0 | 0 | 0 |
| 0 | 0 | 0 | 0 | 0 | 0 | 0 | 0 | 0 |
| 0 | 0 | 0 | 1 | 0 | 0 | 0 | 0 | 0 |
| 0 | 0 | 0 | 1 | 0 | 0 | 0 | 0 | 0 |
| 0 | 0 | 0 | 0 | 0 | 0 | 0 | 1 | 0 |
| 0 | 1 | 1 | 0 | 0 | 0 | 0 | 0 | 0 |
| 1 | 0 | 0 | 1 | 0 | 0 | 0 | 0 | 0 |
| 0 | 0 | 0 | 1 | 0 | 0 | 0 | 0 | 0 |
| 1 | 1 | 0 | 0 | 0 | 0 | 0 | 0 | 0 |
| 0 | 0 | 0 | 1 | 0 | 0 | 0 | 0 | 0 |
| 0 | 0 | 0 | 0 | 0 | 0 | 0 | 0 | 0 |
| 0 | 0 | 0 | 0 | 0 | 0 | 0 | 0 | 0 |
| 0 | 0 | 0 | 0 | 0 | 0 | 0 | 0 | 0 |
| 0 | 0 | 0 | 0 | 0 | 0 | 0 | 0 | 0 |
| 0 | 0 | 0 | 1 | 0 | 0 | 0 | 0 | 0 |
| 0 | 0 | 0 | 1 | 0 | 0 | 0 | 0 | 0 |
| 0 | 0 | 0 | 1 | 0 | 0 | 0 | 0 | 0 |
| 0 | 0 | 0 | 1 | 0 | 0 | 0 | 0 | 0 |
| 0 | 0 | 0 | 1 | 0 | 0 | 0 | 0 | 0 |
| 0 | 0 | 0 | 1 | 1 | 1 | 0 | 0 | 0 |
| 0 | 0 | 0 | 0 | 0 | 0 | 0 | 0 | 0 |
| 0 | 0 | 0 | 0 | 0 | 0 | 0 | 0 | 0 |
| 0 | 0 | 0 | 1 | 0 | 0 | 0 | 0 | 0 |
| 0 | 0 | 0 | 1 | 0 | 0 | 0 | 0 | 0 |
| 0 | 0 | 0 | 1 | 0 | 0 | 0 | 0 | 0 |

|   |   |   |   |   |   |   |   |   |
|---|---|---|---|---|---|---|---|---|
| 0 | 0 | 0 | 0 | 0 | 0 | 0 | 0 | 0 |
| 0 | 0 | 0 | 0 | 0 | 0 | 0 | 0 | 0 |
| 0 | 0 | 0 | 0 | 0 | 0 | 0 | 0 | 0 |
| 0 | 0 | 0 | 0 | 0 | 0 | 0 | 0 | 0 |
| 0 | 0 | 0 | 0 | 0 | 0 | 0 | 0 | 0 |
| 0 | 0 | 0 | 0 | 0 | 0 | 0 | 0 | 0 |
| 0 | 0 | 0 | 0 | 0 | 0 | 0 | 0 | 0 |
| 0 | 0 | 0 | 1 | 0 | 0 | 0 | 1 | 0 |
| 0 | 0 | 0 | 0 | 0 | 0 | 0 | 0 | 0 |
| 0 | 0 | 0 | 0 | 0 | 0 | 0 | 0 | 0 |
| 0 | 0 | 0 | 0 | 0 | 0 | 0 | 0 | 0 |
| 0 | 0 | 0 | 0 | 0 | 0 | 0 | 0 | 0 |
| 1 | 0 | 0 | 0 | 0 | 0 | 0 | 0 | 0 |
| 0 | 0 | 0 | 0 | 0 | 0 | 0 | 0 | 0 |
| 0 | 0 | 0 | 0 | 0 | 0 | 0 | 0 | 0 |
| 0 | 0 | 0 | 0 | 0 | 0 | 0 | 0 | 0 |
| 0 | 0 | 0 | 0 | 0 | 0 | 0 | 0 | 0 |
| 0 | 0 | 0 | 0 | 0 | 0 | 0 | 0 | 0 |
| 0 | 0 | 0 | 1 | 0 | 0 | 0 | 0 | 0 |
| 0 | 0 | 0 | 0 | 0 | 0 | 0 | 0 | 0 |
| 0 | 0 | 0 | 0 | 0 | 0 | 0 | 0 | 0 |
| 0 | 0 | 0 | 0 | 0 | 0 | 0 | 0 | 0 |
| 0 | 0 | 0 | 0 | 0 | 0 | 0 | 0 | 0 |
| 0 | 0 | 0 | 0 | 0 | 0 | 0 | 0 | 0 |
| 0 | 0 | 0 | 0 | 0 | 0 | 0 | 0 | 0 |
| 0 | 0 | 0 | 0 | 0 | 0 | 0 | 1 | 0 |
| 1 | 0 | 1 | 1 | 0 | 0 | 0 | 0 | 0 |
| 0 | 1 | 1 | 0 | 0 | 0 | 0 | 0 | 0 |
| 0 | 1 | 0 | 0 | 0 | 0 | 0 | 0 | 0 |
| 0 | 1 | 0 | 1 | 0 | 0 | 0 | 0 | 0 |
| 1 | 1 | 1 | 0 | 0 | 0 | 0 | 0 | 0 |
| 0 | 0 | 0 | 1 | 0 | 0 | 0 | 1 | 0 |
| 0 | 1 | 1 | 0 | 0 | 0 | 0 | 0 | 0 |
| 0 | 1 | 1 | 0 | 0 | 0 | 0 | 1 | 0 |
| 0 | 1 | 0 | 0 | 0 | 0 | 0 | 0 | 0 |
| 0 | 0 | 0 | 1 | 0 | 0 | 0 | 0 | 0 |
| 1 | 1 | 0 | 0 | 0 | 0 | 0 | 0 | 0 |
| 0 | 1 | 0 | 0 | 0 | 0 | 0 | 0 | 0 |
| 1 | 1 | 1 | 0 | 0 | 0 | 0 | 0 | 1 |
| 1 | 1 | 1 | 1 | 0 | 0 | 0 | 0 | 0 |
| 0 | 0 | 0 | 0 | 0 | 0 | 0 | 0 | 0 |
| 0 | 0 | 1 | 0 | 0 | 0 | 0 | 0 | 0 |
| 0 | 1 | 0 | 0 | 0 | 0 | 0 | 0 | 0 |
| 0 | 1 | 0 | 1 | 0 | 0 | 0 | 1 | 0 |
| 0 | 0 | 0 | 0 | 0 | 0 | 0 | 0 | 0 |
| 0 | 0 | 0 | 0 | 0 | 0 | 0 | 1 | 0 |
| 1 | 0 | 0 | 1 | 0 | 0 | 0 | 0 | 0 |
| 1 | 0 | 0 | 1 | 0 | 0 | 0 | 0 | 0 |
| 0 | 0 | 0 | 1 | 0 | 0 | 0 | 0 | 0 |
| 1 | 1 | 1 | 1 | 0 | 0 | 0 | 0 | 0 |





|   |   |   |   |   |   |   |   |   |
|---|---|---|---|---|---|---|---|---|
| 0 | 0 | 0 | 0 | 0 | 0 | 0 | 0 | 0 |
| 0 | 0 | 1 | 1 | 0 | 0 | 0 | 0 | 0 |
| 0 | 0 | 0 | 0 | 0 | 0 | 0 | 0 | 0 |
| 0 | 0 | 0 | 1 | 0 | 0 | 0 | 1 | 0 |
| 0 | 0 | 0 | 1 | 0 | 0 | 0 | 0 | 0 |
| 0 | 1 | 0 | 1 | 0 | 0 | 0 | 0 | 0 |
| 0 | 0 | 0 | 0 | 0 | 0 | 0 | 0 | 0 |
| 1 | 0 | 0 | 0 | 0 | 0 | 0 | 0 | 0 |
| 0 | 0 | 0 | 0 | 0 | 0 | 0 | 0 | 0 |
| 0 | 0 | 0 | 0 | 0 | 0 | 0 | 0 | 0 |
| 0 | 0 | 0 | 0 | 0 | 0 | 0 | 0 | 0 |
| 0 | 0 | 0 | 0 | 0 | 0 | 0 | 0 | 0 |
| 1 | 0 | 0 | 1 | 0 | 0 | 0 | 0 | 0 |
| 0 | 0 | 0 | 0 | 0 | 0 | 0 | 0 | 0 |
| 0 | 1 | 0 | 0 | 0 | 0 | 0 | 0 | 0 |
| 0 | 0 | 0 | 0 | 0 | 0 | 0 | 0 | 0 |
| 0 | 0 | 0 | 0 | 0 | 0 | 0 | 0 | 0 |
| 0 | 0 | 0 | 0 | 0 | 0 | 0 | 0 | 0 |
| 0 | 0 | 1 | 0 | 0 | 0 | 0 | 0 | 0 |
| 0 | 0 | 0 | 0 | 0 | 0 | 0 | 0 | 0 |
| 1 | 0 | 0 | 0 | 0 | 0 | 0 | 0 | 0 |
| 0 | 0 | 1 | 0 | 0 | 0 | 0 | 0 | 0 |
| 0 | 0 | 0 | 0 | 0 | 0 | 0 | 0 | 0 |
| 0 | 0 | 0 | 0 | 0 | 0 | 0 | 0 | 0 |
| 0 | 0 | 0 | 0 | 0 | 0 | 0 | 0 | 0 |
| 0 | 0 | 0 | 0 | 0 | 0 | 0 | 0 | 0 |
| 0 | 0 | 0 | 0 | 0 | 0 | 0 | 0 | 0 |
| 0 | 0 | 0 | 0 | 0 | 0 | 0 | 0 | 0 |
| 0 | 0 | 0 | 0 | 0 | 0 | 0 | 0 | 0 |
| 0 | 0 | 0 | 0 | 0 | 0 | 0 | 0 | 0 |
| 0 | 0 | 1 | 0 | 0 | 0 | 0 | 0 | 0 |
| 0 | 0 | 0 | 0 | 0 | 0 | 0 | 0 | 0 |
| 0 | 0 | 0 | 0 | 0 | 0 | 0 | 0 | 0 |
| 0 | 0 | 0 | 1 | 0 | 0 | 0 | 0 | 0 |
| 0 | 0 | 0 | 0 | 0 | 0 | 0 | 0 | 0 |
| 0 | 1 | 0 | 0 | 0 | 0 | 0 | 0 | 0 |
| 0 | 0 | 0 | 0 | 0 | 0 | 0 | 0 | 0 |
| 0 | 0 | 0 | 0 | 0 | 0 | 0 | 0 | 0 |
| 0 | 0 | 1 | 0 | 0 | 0 | 0 | 0 | 0 |
| 0 | 0 | 1 | 0 | 0 | 0 | 0 | 0 | 0 |
| 0 | 0 | 0 | 0 | 0 | 0 | 0 | 0 | 0 |
| 1 | 0 | 0 | 1 | 0 | 0 | 0 | 0 | 0 |
| 0 | 0 | 1 | 0 | 0 | 0 | 0 | 0 | 0 |
| 0 | 0 | 0 | 0 | 0 | 0 | 0 | 0 | 0 |
| 1 | 0 | 0 | 1 | 0 | 0 | 0 | 0 | 0 |





|   |   |   |   |   |   |   |   |   |
|---|---|---|---|---|---|---|---|---|
| 0 | 0 | 1 | 0 | 0 | 0 | 0 | 0 | 0 |
| 0 | 0 | 0 | 0 | 0 | 0 | 0 | 1 | 0 |
| 1 | 0 | 0 | 0 | 0 | 0 | 0 | 1 | 0 |
| 0 | 0 | 0 | 1 | 0 | 0 | 0 | 0 | 0 |
| 0 | 0 | 0 | 0 | 0 | 0 | 0 | 0 | 0 |
| 0 | 0 | 0 | 0 | 0 | 0 | 0 | 0 | 0 |
| 0 | 0 | 0 | 0 | 0 | 0 | 0 | 0 | 1 |
| 0 | 0 | 0 | 0 | 0 | 0 | 0 | 0 | 0 |
| 0 | 0 | 1 | 0 | 0 | 0 | 0 | 0 | 0 |
| 1 | 1 | 0 | 0 | 0 | 0 | 0 | 0 | 0 |
| 0 | 0 | 0 | 1 | 0 | 0 | 0 | 0 | 0 |
| 0 | 0 | 0 | 0 | 0 | 0 | 0 | 0 | 0 |
| 0 | 0 | 0 | 1 | 0 | 0 | 0 | 0 | 0 |
| 0 | 0 | 1 | 0 | 0 | 0 | 0 | 0 | 0 |
| 0 | 0 | 0 | 1 | 0 | 0 | 0 | 0 | 0 |
| 0 | 0 | 0 | 0 | 0 | 0 | 0 | 0 | 0 |
| 0 | 0 | 0 | 0 | 0 | 0 | 0 | 0 | 0 |
| 0 | 0 | 0 | 0 | 0 | 0 | 0 | 0 | 0 |
| 0 | 0 | 0 | 0 | 0 | 0 | 0 | 0 | 0 |
| 0 | 0 | 0 | 0 | 0 | 0 | 0 | 0 | 0 |
| 0 | 0 | 0 | 0 | 0 | 0 | 0 | 0 | 0 |
| 0 | 0 | 0 | 0 | 0 | 0 | 0 | 0 | 0 |
| 0 | 0 | 0 | 0 | 0 | 0 | 0 | 0 | 0 |
| 0 | 0 | 0 | 0 | 0 | 0 | 0 | 0 | 0 |
| 0 | 0 | 0 | 0 | 0 | 0 | 0 | 0 | 0 |
| 0 | 0 | 0 | 0 | 0 | 0 | 0 | 0 | 1 |
| 0 | 0 | 0 | 0 | 0 | 0 | 0 | 0 | 0 |
| 0 | 0 | 0 | 0 | 0 | 0 | 0 | 0 | 0 |
| 0 | 0 | 0 | 0 | 0 | 0 | 0 | 0 | 0 |
| 0 | 0 | 0 | 0 | 0 | 0 | 0 | 0 | 0 |
| 0 | 0 | 0 | 1 | 0 | 0 | 0 | 0 | 0 |
| 0 | 0 | 0 | 0 | 0 | 0 | 0 | 0 | 0 |
| 0 | 0 | 0 | 1 | 0 | 0 | 0 | 0 | 0 |
| 0 | 0 | 0 | 0 | 0 | 0 | 0 | 0 | 0 |
| 0 | 0 | 0 | 1 | 0 | 0 | 0 | 0 | 0 |
| 0 | 0 | 0 | 0 | 0 | 0 | 0 | 0 | 0 |
| 0 | 0 | 0 | 1 | 0 | 0 | 0 | 0 | 0 |
| 0 | 0 | 0 | 0 | 0 | 0 | 0 | 0 | 0 |
| 0 | 0 | 0 | 1 | 0 | 0 | 0 | 0 | 0 |
| 0 | 0 | 0 | 0 | 0 | 0 | 0 | 0 | 0 |
| 0 | 0 | 0 | 1 | 0 | 0 | 0 | 0 | 0 |
| 0 | 0 | 0 | 0 | 0 | 0 | 0 | 0 | 0 |
| 0 | 0 | 0 | 1 | 0 | 0 | 0 | 0 | 0 |
| 0 | 0 | 0 | 0 | 0 | 0 | 0 | 0 | 0 |
| 0 | 0 | 0 | 0 | 0 | 0 | 0 | 0 | 0 |
| 0 | 0 | 0 | 0 | 0 | 0 | 0 | 0 | 0 |
| 0 | 0 | 0 | 0 | 0 | 0 | 0 | 0 | 0 |
| 0 | 0 | 1 | 1 | 0 | 0 | 0 | 1 | 0 |
| 0 | 0 | 0 | 1 | 0 | 0 | 0 | 0 | 0 |





|   |   |   |   |   |   |   |   |   |
|---|---|---|---|---|---|---|---|---|
| 0 | 0 | 0 | 1 | 0 | 0 | 0 | 1 | 0 |
| 0 | 0 | 0 | 1 | 0 | 0 | 0 | 0 | 0 |
| 0 | 0 | 0 | 1 | 0 | 0 | 0 | 0 | 0 |
| 0 | 0 | 0 | 1 | 0 | 0 | 0 | 1 | 0 |
| 1 | 0 | 0 | 1 | 0 | 0 | 0 | 0 | 0 |
| 0 | 0 | 0 | 1 | 0 | 0 | 0 | 1 | 0 |
| 0 | 0 | 0 | 1 | 0 | 0 | 0 | 0 | 0 |
| 0 | 1 | 0 | 1 | 0 | 0 | 0 | 0 | 0 |
| 0 | 0 | 0 | 0 | 0 | 0 | 0 | 0 | 0 |
| 0 | 0 | 0 | 0 | 0 | 0 | 0 | 0 | 0 |
| 0 | 0 | 0 | 0 | 0 | 0 | 0 | 0 | 0 |
| 1 | 0 | 0 | 0 | 0 | 0 | 0 | 0 | 0 |
| 0 | 0 | 0 | 1 | 0 | 0 | 0 | 1 | 0 |
| 1 | 0 | 0 | 0 | 0 | 0 | 0 | 0 | 0 |
| 0 | 0 | 0 | 1 | 0 | 0 | 0 | 0 | 0 |
| 0 | 0 | 0 | 0 | 0 | 0 | 0 | 0 | 0 |
| 0 | 0 | 0 | 1 | 0 | 0 | 0 | 0 | 0 |
| 0 | 0 | 0 | 0 | 0 | 0 | 0 | 0 | 0 |
| 1 | 1 | 0 | 0 | 0 | 0 | 0 | 1 | 0 |
| 0 | 0 | 0 | 0 | 0 | 0 | 0 | 0 | 0 |
| 0 | 0 | 0 | 1 | 0 | 0 | 0 | 1 | 0 |
| 0 | 0 | 0 | 1 | 0 | 0 | 0 | 0 | 0 |
| 0 | 0 | 0 | 1 | 0 | 0 | 0 | 0 | 0 |
| 0 | 0 | 0 | 1 | 0 | 0 | 0 | 1 | 0 |
| 0 | 0 | 0 | 1 | 0 | 0 | 0 | 0 | 0 |
| 0 | 0 | 0 | 0 | 0 | 0 | 0 | 0 | 0 |
| 0 | 0 | 0 | 1 | 0 | 0 | 0 | 0 | 0 |
| 0 | 1 | 0 | 0 | 0 | 0 | 0 | 0 | 0 |
| 0 | 0 | 0 | 1 | 0 | 0 | 0 | 0 | 0 |
| 1 | 0 | 1 | 1 | 0 | 0 | 0 | 0 | 0 |
| 1 | 0 | 1 | 1 | 0 | 0 | 0 | 0 | 0 |
| 0 | 0 | 0 | 1 | 0 | 0 | 0 | 0 | 0 |
| 0 | 0 | 0 | 0 | 0 | 0 | 0 | 0 | 0 |
| 0 | 0 | 0 | 1 | 0 | 0 | 0 | 0 | 0 |
| 0 | 0 | 1 | 1 | 0 | 0 | 0 | 0 | 0 |
| 0 | 0 | 0 | 0 | 0 | 0 | 0 | 0 | 0 |
| 0 | 0 | 0 | 1 | 0 | 0 | 0 | 0 | 0 |
| 0 | 1 | 1 | 1 | 0 | 0 | 0 | 1 | 0 |
| 0 | 0 | 0 | 1 | 0 | 0 | 0 | 0 | 0 |
| 0 | 1 | 1 | 0 | 0 | 0 | 0 | 0 | 0 |
| 0 | 0 | 0 | 1 | 0 | 0 | 0 | 0 | 0 |
| 1 | 0 | 0 | 1 | 0 | 0 | 0 | 0 | 0 |
| 0 | 0 | 0 | 0 | 0 | 0 | 0 | 0 | 0 |
| 0 | 1 | 0 | 1 | 0 | 0 | 0 | 0 | 0 |
| 0 | 0 | 0 | 1 | 0 | 0 | 0 | 0 | 0 |
| 0 | 0 | 0 | 1 | 0 | 0 | 0 | 0 | 0 |
| 0 | 0 | 0 | 0 | 0 | 0 | 0 | 0 | 0 |
| 0 | 0 | 0 | 1 | 0 | 0 | 0 | 0 | 0 |

|   |   |   |   |   |   |   |   |   |
|---|---|---|---|---|---|---|---|---|
| 0 | 0 | 0 | 1 | 0 | 0 | 0 | 0 | 0 |
| 0 | 0 | 0 | 1 | 0 | 0 | 0 | 0 | 0 |
| 0 | 0 | 0 | 1 | 0 | 0 | 0 | 0 | 0 |
| 1 | 0 | 0 | 1 | 0 | 0 | 0 | 0 | 0 |
| 0 | 0 | 0 | 1 | 0 | 0 | 0 | 0 | 0 |
| 0 | 0 | 0 | 1 | 0 | 0 | 0 | 0 | 0 |
| 0 | 0 | 0 | 0 | 0 | 0 | 0 | 0 | 0 |
| 0 | 0 | 0 | 1 | 0 | 0 | 0 | 1 | 0 |
| 1 | 0 | 0 | 0 | 0 | 0 | 0 | 0 | 0 |
| 0 | 0 | 0 | 0 | 0 | 0 | 0 | 0 | 0 |
| 0 | 0 | 0 | 1 | 0 | 0 | 0 | 0 | 0 |
| 0 | 0 | 0 | 1 | 0 | 0 | 0 | 0 | 0 |
| 0 | 0 | 0 | 0 | 0 | 0 | 0 | 1 | 0 |
| 0 | 0 | 0 | 0 | 0 | 0 | 0 | 0 | 0 |
| 0 | 0 | 0 | 0 | 0 | 0 | 0 | 1 | 0 |
| 0 | 0 | 0 | 1 | 0 | 0 | 0 | 0 | 0 |
| 0 | 0 | 0 | 0 | 0 | 0 | 0 | 0 | 0 |
| 0 | 0 | 0 | 0 | 0 | 0 | 0 | 0 | 0 |
| 0 | 0 | 0 | 0 | 0 | 0 | 0 | 0 | 0 |
| 0 | 0 | 0 | 0 | 0 | 0 | 0 | 0 | 0 |
| 0 | 0 | 0 | 1 | 0 | 0 | 0 | 0 | 0 |
| 0 | 0 | 0 | 1 | 0 | 0 | 0 | 0 | 0 |
| 0 | 1 | 0 | 1 | 0 | 0 | 0 | 0 | 0 |
| 1 | 0 | 0 | 1 | 0 | 0 | 0 | 0 | 0 |
| 1 | 0 | 0 | 0 | 0 | 0 | 0 | 0 | 0 |
| 0 | 0 | 0 | 1 | 0 | 0 | 0 | 0 | 0 |
| 0 | 0 | 0 | 1 | 0 | 0 | 0 | 0 | 0 |
| 1 | 0 | 0 | 0 | 0 | 0 | 0 | 0 | 0 |
| 1 | 0 | 1 | 1 | 0 | 0 | 0 | 1 | 0 |
| 0 | 1 | 0 | 0 | 0 | 0 | 0 | 0 | 0 |
| 0 | 0 | 1 | 0 | 0 | 0 | 0 | 0 | 0 |
| 0 | 0 | 0 | 1 | 0 | 0 | 0 | 0 | 0 |
| 0 | 0 | 0 | 1 | 0 | 0 | 0 | 0 | 0 |
| 1 | 0 | 1 | 1 | 0 | 0 | 0 | 0 | 0 |
| 1 | 0 | 0 | 0 | 0 | 0 | 0 | 0 | 0 |
| 0 | 1 | 0 | 0 | 0 | 0 | 0 | 0 | 0 |
| 0 | 0 | 0 | 0 | 0 | 0 | 0 | 0 | 0 |
| 0 | 0 | 0 | 1 | 0 | 0 | 0 | 0 | 0 |
| 0 | 0 | 0 | 1 | 0 | 0 | 0 | 0 | 0 |
| 0 | 0 | 0 | 1 | 0 | 0 | 0 | 0 | 0 |
| 0 | 1 | 1 | 0 | 0 | 0 | 0 | 0 | 0 |
| 0 | 0 | 0 | 1 | 0 | 0 | 0 | 0 | 0 |
| 0 | 0 | 0 | 1 | 0 | 0 | 0 | 0 | 0 |
| 0 | 0 | 0 | 1 | 0 | 0 | 0 | 0 | 1 |
| 0 | 0 | 0 | 1 | 0 | 0 | 0 | 0 | 0 |
| 0 | 0 | 0 | 1 | 0 | 0 | 0 | 0 | 0 |
| 1 | 0 | 0 | 0 | 0 | 0 | 0 | 0 | 0 |
| 0 | 0 | 0 | 0 | 0 | 0 | 0 | 0 | 0 |
| 0 | 0 | 0 | 1 | 0 | 0 | 0 | 0 | 0 |

|   |   |   |   |   |   |   |   |   |
|---|---|---|---|---|---|---|---|---|
| 0 | 0 | 0 | 0 | 0 | 0 | 0 | 0 | 0 |
| 0 | 0 | 0 | 1 | 0 | 0 | 0 | 0 | 0 |
| 0 | 0 | 0 | 1 | 0 | 0 | 0 | 0 | 0 |
| 0 | 0 | 0 | 1 | 0 | 0 | 0 | 1 | 0 |
| 0 | 0 | 0 | 1 | 0 | 0 | 0 | 0 | 0 |
| 0 | 0 | 0 | 1 | 0 | 0 | 0 | 0 | 0 |
| 0 | 0 | 0 | 1 | 0 | 0 | 0 | 1 | 0 |
| 0 | 0 | 0 | 1 | 0 | 0 | 0 | 0 | 0 |
| 1 | 0 | 0 | 0 | 0 | 0 | 0 | 0 | 0 |
| 0 | 0 | 0 | 0 | 0 | 0 | 0 | 0 | 0 |
| 0 | 0 | 0 | 0 | 0 | 0 | 0 | 0 | 0 |
| 0 | 0 | 0 | 1 | 0 | 0 | 0 | 0 | 0 |
| 0 | 0 | 0 | 0 | 0 | 0 | 0 | 0 | 0 |
| 0 | 1 | 1 | 0 | 0 | 0 | 0 | 0 | 0 |

| <b>WED</b> | <b>ABI</b> | <b>ARDS</b> | <b>ARF</b> | <b>MODS</b> | <b>BI</b> | <b>ISS</b> | <b>Diabetes</b> | <b>Hypertension</b> |
|------------|------------|-------------|------------|-------------|-----------|------------|-----------------|---------------------|
| 0          | 0          | 0           | 0          | 0           | 0         | 3          | 0               | 0                   |
| 0          | 0          | 0           | 0          | 0           | 0         | 3          | 0               | 0                   |
| 0          | 0          | 0           | 0          | 0           | 0         | 3          | 0               | 0                   |
| 0          | 0          | 0           | 0          | 0           | 0         | 2          | 0               | 0                   |
| 0          | 0          | 0           | 0          | 0           | 0         | 2          | 0               | 0                   |
| 0          | 0          | 0           | 0          | 0           | 0         | 4          | 0               | 0                   |
| 0          | 0          | 0           | 0          | 0           | 1         | 1          | 0               | 0                   |
| 0          | 0          | 0           | 0          | 0           | 0         | 2          | 0               | 1                   |
| 0          | 0          | 0           | 0          | 0           | 0         | 4          | 0               | 0                   |
| 0          | 0          | 0           | 0          | 0           | 0         | 3          | 0               | 0                   |
| 0          | 0          | 0           | 0          | 0           | 0         | 2          | 1               | 0                   |
| 0          | 0          | 0           | 0          | 0           | 0         | 2          | 0               | 0                   |
| 0          | 0          | 0           | 0          | 0           | 0         | 2          | 0               | 0                   |
| 0          | 0          | 0           | 0          | 0           | 0         | 2          | 0               | 0                   |
| 0          | 0          | 0           | 0          | 0           | 0         | 1          | 0               | 0                   |
| 0          | 0          | 0           | 0          | 0           | 0         | 3          | 0               | 0                   |
| 0          | 0          | 0           | 0          | 0           | 0         | 2          | 0               | 0                   |
| 0          | 0          | 0           | 0          | 0           | 0         | 4          | 0               | 0                   |
| 0          | 0          | 0           | 0          | 0           | 0         | 2          | 0               | 0                   |
| 0          | 0          | 0           | 0          | 0           | 0         | 4          | 1               | 0                   |
| 0          | 0          | 0           | 0          | 0           | 0         | 2          | 0               | 0                   |
| 0          | 0          | 0           | 0          | 0           | 0         | 3          | 0               | 0                   |
| 0          | 0          | 0           | 0          | 0           | 0         | 3          | 0               | 0                   |
| 0          | 0          | 0           | 0          | 0           | 0         | 3          | 0               | 0                   |
| 0          | 0          | 0           | 0          | 0           | 0         | 3          | 0               | 1                   |
| 0          | 0          | 0           | 0          | 0           | 0         | 3          | 0               | 0                   |
| 0          | 0          | 0           | 0          | 0           | 0         | 3          | 0               | 0                   |
| 0          | 0          | 0           | 0          | 0           | 0         | 1          | 0               | 0                   |
| 0          | 0          | 0           | 0          | 0           | 0         | 2          | 0               | 0                   |
| 0          | 0          | 0           | 1          | 0           | 1         | 2          | 0               | 1                   |
| 0          | 0          | 0           | 0          | 0           | 0         | 3          | 0               | 0                   |
| 0          | 0          | 0           | 0          | 0           | 1         | 3          | 1               | 0                   |
| 0          | 0          | 0           | 0          | 0           | 0         | 4          | 0               | 0                   |
| 0          | 0          | 0           | 0          | 0           | 0         | 4          | 0               | 0                   |
| 0          | 0          | 0           | 0          | 0           | 0         | 2          | 0               | 0                   |
| 0          | 0          | 0           | 0          | 0           | 0         | 3          | 0               | 1                   |
| 0          | 0          | 0           | 0          | 0           | 1         | 2          | 0               | 0                   |
| 0          | 0          | 0           | 0          | 0           | 0         | 4          | 0               | 0                   |
| 0          | 0          | 0           | 0          | 0           | 0         | 1          | 0               | 0                   |
| 0          | 0          | 0           | 0          | 0           | 0         | 3          | 0               | 0                   |
| 0          | 0          | 0           | 0          | 0           | 1         | 4          | 1               | 1                   |
| 0          | 0          | 0           | 0          | 0           | 0         | 3          | 0               | 0                   |
| 0          | 0          | 0           | 0          | 0           | 0         | 2          | 0               | 0                   |
| 0          | 0          | 0           | 0          | 0           | 0         | 4          | 0               | 0                   |
| 0          | 0          | 0           | 0          | 0           | 0         | 2          | 0               | 0                   |
| 0          | 0          | 0           | 0          | 0           | 0         | 3          | 0               | 0                   |
| 0          | 0          | 0           | 0          | 0           | 0         | 3          | 0               | 0                   |

|   |   |   |   |   |   |   |   |   |
|---|---|---|---|---|---|---|---|---|
| 0 | 0 | 0 | 0 | 0 | 0 | 2 | 0 | 1 |
| 0 | 0 | 0 | 0 | 0 | 0 | 4 | 0 | 0 |
| 0 | 0 | 0 | 0 | 0 | 0 | 3 | 0 | 0 |
| 0 | 0 | 0 | 0 | 0 | 0 | 2 | 0 | 0 |
| 0 | 0 | 0 | 0 | 0 | 0 | 4 | 0 | 0 |
| 0 | 0 | 0 | 0 | 0 | 0 | 4 | 0 | 0 |
| 0 | 0 | 0 | 0 | 0 | 0 | 4 | 0 | 0 |
| 0 | 0 | 0 | 0 | 0 | 1 | 4 | 0 | 0 |
| 0 | 0 | 0 | 0 | 0 | 0 | 1 | 0 | 0 |
| 0 | 0 | 0 | 0 | 0 | 0 | 1 | 0 | 0 |
| 0 | 0 | 0 | 0 | 0 | 0 | 3 | 0 | 0 |
| 0 | 0 | 0 | 0 | 0 | 0 | 2 | 0 | 0 |
| 0 | 0 | 0 | 0 | 0 | 0 | 3 | 0 | 1 |
| 0 | 0 | 0 | 0 | 0 | 0 | 4 | 0 | 0 |
| 0 | 0 | 0 | 0 | 0 | 0 | 2 | 0 | 0 |
| 0 | 0 | 0 | 0 | 0 | 0 | 3 | 0 | 0 |
| 0 | 0 | 0 | 0 | 0 | 1 | 4 | 0 | 0 |
| 0 | 0 | 0 | 0 | 0 | 0 | 1 | 1 | 0 |
| 0 | 0 | 0 | 0 | 0 | 0 | 3 | 0 | 1 |
| 0 | 0 | 0 | 0 | 0 | 0 | 3 | 0 | 0 |
| 0 | 0 | 0 | 0 | 0 | 0 | 4 | 0 | 0 |
| 0 | 0 | 0 | 0 | 0 | 0 | 4 | 0 | 0 |
| 0 | 0 | 0 | 0 | 0 | 0 | 4 | 0 | 0 |
| 0 | 0 | 0 | 0 | 0 | 0 | 4 | 0 | 0 |
| 0 | 0 | 0 | 0 | 0 | 0 | 3 | 0 | 0 |
| 0 | 0 | 0 | 0 | 0 | 0 | 3 | 0 | 0 |
| 0 | 0 | 0 | 0 | 0 | 0 | 3 | 0 | 0 |
| 0 | 0 | 0 | 0 | 0 | 0 | 3 | 0 | 0 |
| 0 | 0 | 0 | 0 | 0 | 0 | 4 | 0 | 0 |
| 0 | 0 | 0 | 0 | 0 | 0 | 3 | 0 | 0 |
| 0 | 0 | 0 | 0 | 0 | 0 | 4 | 1 | 1 |
| 0 | 0 | 0 | 0 | 0 | 0 | 3 | 0 | 0 |
| 0 | 0 | 0 | 0 | 0 | 0 | 2 | 0 | 0 |
| 0 | 0 | 0 | 0 | 0 | 0 | 2 | 0 | 0 |
| 0 | 0 | 0 | 0 | 0 | 1 | 3 | 0 | 0 |
| 0 | 0 | 0 | 0 | 0 | 0 | 2 | 0 | 0 |
| 0 | 0 | 0 | 0 | 0 | 0 | 3 | 0 | 0 |
| 0 | 0 | 0 | 0 | 0 | 0 | 4 | 0 | 0 |
| 0 | 0 | 0 | 0 | 0 | 0 | 1 | 0 | 0 |
| 0 | 0 | 0 | 0 | 0 | 1 | 2 | 0 | 0 |
| 0 | 0 | 0 | 0 | 0 | 0 | 4 | 0 | 1 |
| 0 | 0 | 0 | 0 | 0 | 0 | 2 | 0 | 0 |
| 0 | 0 | 0 | 0 | 0 | 0 | 2 | 0 | 0 |
| 0 | 0 | 0 | 0 | 0 | 0 | 2 | 0 | 0 |
| 0 | 0 | 0 | 0 | 0 | 1 | 4 | 0 | 0 |
| 0 | 0 | 0 | 0 | 0 | 0 | 3 | 0 | 0 |
| 0 | 0 | 0 | 0 | 1 | 0 | 3 | 1 | 0 |
| 0 | 0 | 0 | 0 | 0 | 0 | 3 | 0 | 0 |
| 0 | 0 | 0 | 0 | 0 | 0 | 2 | 0 | 0 |









|   |   |   |   |   |   |   |   |   |
|---|---|---|---|---|---|---|---|---|
| 0 | 0 | 0 | 0 | 0 | 0 | 2 | 0 | 1 |
| 0 | 0 | 0 | 0 | 0 | 0 | 3 | 0 | 0 |
| 0 | 0 | 0 | 0 | 0 | 0 | 2 | 0 | 0 |
| 0 | 0 | 0 | 0 | 0 | 0 | 2 | 0 | 0 |
| 0 | 0 | 0 | 0 | 0 | 0 | 4 | 0 | 0 |
| 0 | 0 | 0 | 0 | 0 | 0 | 3 | 0 | 0 |
| 0 | 0 | 0 | 0 | 0 | 0 | 2 | 0 | 1 |
| 0 | 0 | 0 | 0 | 0 | 0 | 2 | 1 | 1 |
| 0 | 0 | 0 | 0 | 0 | 0 | 3 | 0 | 0 |
| 0 | 0 | 0 | 0 | 0 | 0 | 1 | 0 | 0 |
| 0 | 0 | 0 | 0 | 0 | 0 | 1 | 1 | 1 |
| 0 | 0 | 0 | 0 | 0 | 0 | 3 | 0 | 0 |
| 0 | 0 | 0 | 0 | 0 | 0 | 2 | 0 | 0 |
| 0 | 0 | 0 | 0 | 0 | 0 | 4 | 0 | 0 |
| 0 | 0 | 1 | 0 | 0 | 1 | 3 | 0 | 1 |
| 0 | 0 | 0 | 0 | 0 | 0 | 2 | 0 | 0 |
| 0 | 0 | 0 | 0 | 0 | 0 | 2 | 0 | 0 |
| 0 | 0 | 0 | 0 | 0 | 0 | 1 | 1 | 1 |
| 0 | 0 | 0 | 0 | 0 | 0 | 1 | 0 | 0 |
| 0 | 0 | 0 | 0 | 0 | 0 | 1 | 0 | 0 |
| 0 | 0 | 0 | 0 | 0 | 0 | 2 | 0 | 0 |
| 0 | 0 | 0 | 0 | 0 | 1 | 4 | 0 | 0 |
| 0 | 0 | 0 | 0 | 0 | 0 | 1 | 0 | 0 |
| 0 | 0 | 0 | 0 | 0 | 0 | 2 | 1 | 1 |
| 0 | 0 | 0 | 0 | 0 | 0 | 1 | 0 | 0 |
| 0 | 0 | 0 | 1 | 0 | 1 | 3 | 0 | 0 |
| 0 | 0 | 0 | 0 | 0 | 0 | 1 | 0 | 0 |
| 0 | 0 | 0 | 0 | 0 | 0 | 4 | 0 | 0 |
| 0 | 0 | 0 | 0 | 0 | 0 | 4 | 0 | 0 |
| 0 | 0 | 0 | 0 | 1 | 1 | 4 | 0 | 0 |
| 0 | 0 | 0 | 0 | 0 | 1 | 4 | 1 | 1 |
| 0 | 0 | 0 | 0 | 0 | 0 | 2 | 0 | 0 |
| 0 | 0 | 0 | 0 | 0 | 1 | 3 | 0 | 0 |
| 0 | 0 | 0 | 0 | 0 | 0 | 2 | 0 | 0 |
| 0 | 0 | 0 | 0 | 0 | 0 | 1 | 0 | 0 |
| 0 | 0 | 0 | 0 | 0 | 0 | 2 | 0 | 0 |
| 0 | 0 | 0 | 0 | 0 | 0 | 2 | 0 | 0 |
| 0 | 0 | 0 | 0 | 0 | 0 | 3 | 0 | 1 |
| 0 | 0 | 0 | 0 | 0 | 0 | 3 | 1 | 1 |
| 0 | 0 | 0 | 0 | 0 | 0 | 1 | 0 | 0 |
| 0 | 0 | 0 | 0 | 0 | 0 | 2 | 0 | 0 |
| 0 | 0 | 0 | 0 | 0 | 0 | 3 | 0 | 0 |
| 0 | 0 | 0 | 0 | 0 | 0 | 2 | 0 | 0 |
| 0 | 0 | 0 | 0 | 0 | 0 | 3 | 0 | 0 |
| 0 | 0 | 0 | 0 | 0 | 0 | 2 | 0 | 0 |
| 0 | 0 | 0 | 0 | 0 | 0 | 3 | 0 | 0 |
| 0 | 0 | 0 | 0 | 0 | 0 | 3 | 0 | 0 |
| 0 | 0 | 0 | 0 | 0 | 0 | 3 | 0 | 0 |
| 0 | 0 | 0 | 0 | 0 | 0 | 3 | 0 | 0 |









|   |   |   |   |   |   |   |   |   |
|---|---|---|---|---|---|---|---|---|
| 0 | 0 | 0 | 0 | 0 | 0 | 2 | 1 | 1 |
| 0 | 0 | 0 | 0 | 0 | 0 | 1 | 0 | 0 |
| 0 | 0 | 0 | 0 | 0 | 0 | 2 | 0 | 0 |
| 0 | 0 | 0 | 0 | 0 | 0 | 1 | 0 | 0 |
| 0 | 0 | 0 | 0 | 0 | 0 | 2 | 0 | 0 |
| 0 | 0 | 0 | 0 | 0 | 0 | 2 | 1 | 1 |
| 0 | 0 | 0 | 0 | 0 | 0 | 2 | 0 | 0 |
| 0 | 0 | 0 | 0 | 0 | 1 | 2 | 0 | 0 |
| 0 | 0 | 0 | 0 | 0 | 0 | 2 | 0 | 0 |
| 0 | 0 | 0 | 0 | 0 | 0 | 2 | 0 | 0 |
| 0 | 0 | 0 | 0 | 0 | 0 | 2 | 0 | 0 |
| 0 | 0 | 0 | 0 | 0 | 0 | 1 | 0 | 0 |
| 0 | 0 | 0 | 0 | 0 | 0 | 2 | 0 | 1 |
| 0 | 0 | 0 | 0 | 0 | 0 | 2 | 0 | 0 |
| 0 | 0 | 0 | 0 | 0 | 1 | 2 | 0 | 0 |
| 0 | 0 | 0 | 0 | 0 | 0 | 1 | 1 | 0 |
| 0 | 0 | 0 | 0 | 0 | 0 | 1 | 0 | 0 |
| 0 | 0 | 0 | 0 | 0 | 0 | 2 | 0 | 0 |
| 0 | 0 | 0 | 0 | 0 | 0 | 2 | 0 | 0 |
| 0 | 0 | 0 | 0 | 0 | 0 | 1 | 0 | 0 |
| 0 | 0 | 0 | 0 | 0 | 0 | 3 | 0 | 0 |
| 0 | 0 | 0 | 0 | 0 | 0 | 3 | 0 | 0 |
| 0 | 0 | 0 | 0 | 0 | 0 | 4 | 0 | 1 |
| 0 | 0 | 0 | 0 | 0 | 1 | 4 | 0 | 0 |
| 0 | 0 | 0 | 0 | 1 | 1 | 4 | 0 | 0 |
| 0 | 0 | 0 | 0 | 0 | 1 | 4 | 0 | 0 |
| 1 | 0 | 0 | 0 | 0 | 1 | 4 | 0 | 0 |
| 0 | 0 | 0 | 0 | 0 | 1 | 4 | 0 | 0 |
| 1 | 1 | 0 | 0 | 1 | 1 | 4 | 0 | 1 |
| 0 | 0 | 0 | 0 | 0 | 1 | 4 | 0 | 0 |
| 0 | 0 | 0 | 1 | 0 | 1 | 4 | 0 | 0 |
| 0 | 0 | 0 | 0 | 0 | 0 | 4 | 0 | 0 |
| 1 | 0 | 0 | 0 | 0 | 0 | 4 | 0 | 0 |
| 0 | 0 | 0 | 0 | 0 | 0 | 3 | 1 | 1 |
| 0 | 0 | 0 | 0 | 0 | 0 | 4 | 0 | 0 |
| 0 | 0 | 0 | 1 | 1 | 1 | 4 | 0 | 0 |
| 1 | 1 | 0 | 0 | 1 | 1 | 4 | 0 | 0 |
| 0 | 0 | 0 | 0 | 0 | 0 | 4 | 0 | 0 |
| 0 | 0 | 0 | 0 | 0 | 0 | 3 | 0 | 0 |
| 1 | 1 | 1 | 0 | 1 | 1 | 3 | 1 | 0 |
| 0 | 0 | 0 | 0 | 0 | 1 | 4 | 0 | 0 |
| 0 | 0 | 0 | 0 | 0 | 0 | 4 | 0 | 0 |
| 0 | 0 | 0 | 0 | 0 | 0 | 3 | 0 | 0 |
| 0 | 0 | 0 | 0 | 0 | 0 | 4 | 0 | 0 |
| 1 | 0 | 0 | 0 | 0 | 1 | 4 | 0 | 0 |
| 0 | 0 | 0 | 0 | 0 | 0 | 3 | 0 | 0 |
| 0 | 0 | 0 | 0 | 0 | 1 | 4 | 0 | 0 |
| 1 | 0 | 0 | 0 | 0 | 1 | 4 | 0 | 0 |









|   |   |   |   |   |   |   |   |   |
|---|---|---|---|---|---|---|---|---|
| 0 | 0 | 1 | 0 | 0 | 0 | 2 | 0 | 0 |
| 0 | 0 | 0 | 0 | 0 | 0 | 3 | 0 | 0 |
| 0 | 0 | 0 | 0 | 0 | 0 | 3 | 0 | 0 |
| 0 | 0 | 0 | 0 | 0 | 0 | 3 | 0 | 0 |
| 0 | 0 | 0 | 0 | 0 | 0 | 4 | 1 | 1 |
| 0 | 0 | 0 | 0 | 0 | 0 | 3 | 0 | 0 |
| 0 | 0 | 0 | 0 | 0 | 0 | 4 | 0 | 0 |
| 0 | 0 | 0 | 0 | 0 | 0 | 3 | 0 | 0 |
| 0 | 0 | 0 | 0 | 0 | 0 | 3 | 0 | 0 |
| 0 | 0 | 0 | 0 | 0 | 0 | 3 | 0 | 0 |
| 0 | 0 | 0 | 0 | 0 | 0 | 3 | 0 | 0 |
| 0 | 0 | 0 | 0 | 0 | 0 | 3 | 0 | 0 |
| 0 | 0 | 0 | 0 | 0 | 0 | 3 | 0 | 0 |
| 0 | 0 | 0 | 0 | 0 | 0 | 3 | 0 | 0 |
| 0 | 0 | 0 | 0 | 0 | 0 | 3 | 0 | 0 |
| 0 | 0 | 0 | 0 | 0 | 0 | 2 | 0 | 0 |
| 0 | 0 | 0 | 0 | 0 | 0 | 4 | 0 | 0 |
| 0 | 0 | 0 | 0 | 0 | 0 | 3 | 0 | 0 |
| 0 | 0 | 0 | 0 | 0 | 0 | 2 | 0 | 0 |
| 0 | 0 | 0 | 0 | 0 | 0 | 3 | 0 | 0 |
| 0 | 0 | 0 | 0 | 0 | 0 | 4 | 0 | 0 |
| 0 | 0 | 0 | 0 | 0 | 0 | 3 | 0 | 0 |
| 0 | 0 | 0 | 0 | 0 | 0 | 2 | 0 | 0 |
| 0 | 0 | 0 | 0 | 0 | 0 | 3 | 0 | 0 |
| 0 | 0 | 0 | 0 | 0 | 0 | 3 | 1 | 1 |
| 0 | 0 | 0 | 0 | 0 | 0 | 1 | 0 | 0 |
| 0 | 0 | 0 | 0 | 0 | 0 | 3 | 0 | 0 |
| 0 | 0 | 0 | 0 | 0 | 0 | 2 | 0 | 0 |
| 0 | 0 | 0 | 0 | 0 | 0 | 4 | 0 | 0 |
| 0 | 0 | 0 | 0 | 0 | 0 | 2 | 0 | 0 |
| 0 | 0 | 0 | 0 | 0 | 0 | 4 | 0 | 0 |
| 0 | 0 | 0 | 0 | 0 | 0 | 2 | 0 | 0 |
| 0 | 0 | 0 | 0 | 0 | 0 | 4 | 0 | 0 |
| 0 | 0 | 0 | 0 | 0 | 0 | 2 | 0 | 0 |
| 0 | 0 | 0 | 0 | 0 | 0 | 4 | 0 | 0 |
| 0 | 0 | 0 | 0 | 0 | 0 | 4 | 0 | 0 |
| 0 | 0 | 0 | 0 | 0 | 0 | 2 | 0 | 0 |
| 0 | 0 | 0 | 0 | 0 | 0 | 2 | 0 | 0 |
| 0 | 0 | 0 | 0 | 0 | 0 | 1 | 0 | 0 |
| 0 | 0 | 0 | 0 | 0 | 0 | 2 | 0 | 0 |
| 0 | 0 | 0 | 0 | 0 | 0 | 1 | 0 | 1 |
| 0 | 0 | 0 | 0 | 0 | 0 | 2 | 0 | 0 |
| 0 | 0 | 0 | 0 | 0 | 0 | 2 | 0 | 0 |







|   |   |   |   |   |   |   |   |   |
|---|---|---|---|---|---|---|---|---|
| 1 | 0 | 0 | 0 | 0 | 1 | 4 | 0 | 0 |
| 0 | 0 | 0 | 0 | 0 | 0 | 4 | 0 | 0 |
| 0 | 0 | 0 | 0 | 0 | 0 | 2 | 0 | 0 |
| 0 | 0 | 0 | 0 | 0 | 0 | 4 | 0 | 0 |
| 1 | 0 | 0 | 0 | 0 | 1 | 2 | 0 | 0 |
| 0 | 0 | 0 | 0 | 0 | 0 | 4 | 0 | 0 |
| 0 | 0 | 0 | 0 | 0 | 0 | 2 | 0 | 1 |
| 0 | 0 | 0 | 0 | 0 | 1 | 4 | 0 | 0 |
| 0 | 0 | 0 | 0 | 0 | 0 | 2 | 0 | 0 |
| 0 | 0 | 0 | 0 | 0 | 0 | 3 | 0 | 0 |
| 0 | 0 | 0 | 0 | 0 | 0 | 1 | 0 | 0 |
| 0 | 0 | 0 | 0 | 0 | 0 | 4 | 0 | 0 |
| 0 | 0 | 0 | 0 | 0 | 0 | 3 | 0 | 1 |
| 0 | 0 | 0 | 0 | 0 | 0 | 4 | 0 | 0 |
| 0 | 0 | 0 | 0 | 0 | 0 | 3 | 0 | 0 |
| 0 | 0 | 0 | 0 | 0 | 0 | 2 | 0 | 0 |
| 0 | 0 | 0 | 0 | 0 | 0 | 2 | 0 | 0 |
| 0 | 0 | 0 | 0 | 0 | 0 | 2 | 0 | 0 |
| 0 | 0 | 0 | 0 | 0 | 0 | 4 | 0 | 0 |
| 0 | 0 | 0 | 0 | 0 | 0 | 2 | 0 | 0 |
| 0 | 0 | 0 | 0 | 0 | 0 | 4 | 0 | 0 |
| 0 | 0 | 0 | 0 | 0 | 0 | 2 | 0 | 0 |
| 0 | 0 | 0 | 0 | 0 | 0 | 4 | 0 | 0 |
| 0 | 0 | 0 | 0 | 0 | 0 | 2 | 0 | 0 |
| 0 | 0 | 0 | 0 | 0 | 0 | 2 | 0 | 0 |
| 0 | 0 | 0 | 0 | 0 | 0 | 3 | 0 | 0 |
| 0 | 0 | 0 | 0 | 0 | 0 | 2 | 0 | 0 |
| 0 | 0 | 0 | 0 | 0 | 1 | 4 | 0 | 0 |
| 0 | 0 | 0 | 0 | 0 | 0 | 2 | 0 | 0 |
| 0 | 0 | 0 | 0 | 0 | 0 | 4 | 0 | 0 |
| 0 | 0 | 0 | 0 | 0 | 0 | 1 | 0 | 0 |
| 0 | 0 | 0 | 0 | 0 | 0 | 2 | 0 | 1 |
| 0 | 0 | 0 | 0 | 0 | 1 | 3 | 0 | 0 |
| 0 | 0 | 0 | 0 | 0 | 0 | 4 | 0 | 0 |
| 0 | 0 | 0 | 0 | 0 | 1 | 3 | 1 | 1 |
| 0 | 0 | 0 | 0 | 0 | 0 | 3 | 0 | 0 |
| 0 | 0 | 0 | 0 | 0 | 1 | 3 | 0 | 0 |
| 0 | 0 | 0 | 0 | 0 | 0 | 3 | 0 | 0 |
| 0 | 0 | 0 | 0 | 0 | 0 | 3 | 0 | 0 |
| 0 | 0 | 0 | 0 | 0 | 0 | 4 | 0 | 0 |
| 0 | 0 | 0 | 0 | 0 | 0 | 3 | 0 | 0 |
| 0 | 0 | 0 | 0 | 0 | 1 | 4 | 0 | 0 |
| 0 | 0 | 0 | 0 | 0 | 0 | 3 | 0 | 0 |
| 0 | 0 | 0 | 0 | 0 | 1 | 3 | 0 | 0 |
| 0 | 0 | 0 | 0 | 0 | 0 | 3 | 0 | 0 |
| 0 | 0 | 0 | 0 | 0 | 1 | 3 | 0 | 1 |
| 0 | 0 | 0 | 0 | 0 | 0 | 2 | 0 | 0 |
| 0 | 0 | 0 | 0 | 0 | 0 | 2 | 0 | 0 |
| 0 | 0 | 0 | 0 | 0 | 0 | 3 | 0 | 0 |
| 0 | 0 | 0 | 0 | 0 | 1 | 3 | 0 | 0 |





|   |   |   |   |   |   |   |   |   |
|---|---|---|---|---|---|---|---|---|
| 0 | 0 | 0 | 0 | 0 | 0 | 2 | 0 | 0 |
| 0 | 0 | 0 | 0 | 0 | 0 | 1 | 0 | 0 |
| 0 | 0 | 0 | 0 | 0 | 0 | 4 | 0 | 0 |
| 0 | 0 | 0 | 0 | 0 | 0 | 3 | 0 | 0 |
| 0 | 0 | 0 | 0 | 0 | 0 | 3 | 0 | 0 |
| 0 | 0 | 0 | 0 | 0 | 0 | 2 | 0 | 0 |
| 0 | 0 | 0 | 0 | 0 | 0 | 4 | 0 | 0 |
| 0 | 0 | 0 | 0 | 0 | 0 | 2 | 0 | 0 |
| 0 | 0 | 0 | 0 | 0 | 0 | 2 | 0 | 0 |
| 0 | 0 | 0 | 0 | 0 | 0 | 1 | 0 | 0 |
| 0 | 0 | 0 | 0 | 0 | 0 | 1 | 0 | 1 |
| 0 | 0 | 0 | 0 | 0 | 0 | 1 | 0 | 0 |
| 0 | 0 | 0 | 0 | 0 | 0 | 2 | 0 | 0 |
| 0 | 0 | 0 | 0 | 1 | 0 | 4 | 0 | 0 |



































0  
0  
0  
0  
0  
0  
0  
0  
0  
0  
0  
0  
0  
0  
0  
0  
0  
0  
0  
0  
0  
0  
1  
0  
0  
0  
1  
0  
0  
0  
1  
0  
0  
0  
0  
0  
0  
1  
0  
0  
0  
0  
0  
0  
0  
0  
1  
1  
0  
0









0  
0  
1  
0  
0  
0  
0  
0  
0  
0  
0  
0  
0  
0  
0
